# Supplementary material for: Transforming growth factor beta 1 induces methylation changes in lung fibroblasts
Source: PLoS One. 2019 Oct 11;14(10):e0223512. doi: 10.1371/journal.pone.0223512 (PMC6788707; doi:10.1371/journal.pone.0223512)
Supplement: S6 Table — (XLSX) [file pone.0223512.s007.xlsx]

## Sheet: Sheet1
# S6 Table - Microarray - IPF TGF-beta 5 days vs IPF Control
PROBEID	ENTREZID	SYMBOL	GENENAME	logFC	AveExpr	t	P.Value	adj.P.Val	B
11722728_a_at	1959	EGR2	early growth response 2	5.98883	7.94614	45.5808	6.6568e-20	1.26722e-16	35.6479
11755736_a_at	50507	NOX4	NADPH oxidase 4	5.91012	8.59395	57.8518	9.77064e-22	1.05935e-17	39.4022
11741143_x_at	50507	NOX4	NADPH oxidase 4	5.56544	8.82388	41.6921	3.21657e-19	3.70242e-16	34.1821
11735587_a_at	3756	KCNH1	potassium voltage-gated channel subfamily H member 1	5.39883	7.55324	42.6256	2.17583e-19	2.83402e-16	34.5486
11731680_a_at	50507	NOX4	NADPH oxidase 4	5.31526	9.42834	44.3798	1.06715e-19	1.65058e-16	35.212
11750957_s_at	50507	NOX4	NADPH oxidase 4	5.31365	7.23027	38.1993	1.50483e-18	1.14587e-15	32.7186
11740475_x_at	50507	NOX4	NADPH oxidase 4	5.2511	9.42143	53.7771	3.56588e-21	1.87058e-17	38.2811
11755252_a_at	347902	AMIGO2	adhesion molecule with Ig like domain 2	4.80456	9.37443	51.1433	8.67904e-21	3.06835e-17	37.4945
11731246_s_at	56256	SERTAD4	SERTA domain containing 4	4.80334	6.90224	38.331	1.41627e-18	1.13061e-15	32.7766
11740476_a_at	50507	NOX4	NADPH oxidase 4	4.51636	7.02433	51.1783	8.57459e-21	3.06835e-17	37.5053
11737334_a_at	347902	AMIGO2	adhesion molecule with Ig like domain 2	4.46906	8.52555	29.972	1.06484e-16	3.37847e-14	28.5649
11755841_a_at	55083	KIF26B	kinesin family member 26B	4.45514	6.74374	35.8022	4.70947e-18	2.74229e-15	31.621
11716771_s_at	150094	SIK1	salt inducible kinase 1	4.44441	8.98644	39.4864	8.39123e-19	7.8363e-16	33.2756
11716771_s_at	102724428	LOC102724428	serine/threonine-protein kinase SIK1	4.44441	8.98644	39.4864	8.39123e-19	7.8363e-16	33.2756
11734363_at	392255	GDF6	growth differentiation factor 6	4.4419	9.03577	53.9068	3.41689e-21	1.87058e-17	38.3185
11755414_a_at	10216	PRG4	proteoglycan 4	4.42552	8.07939	45.3439	7.29931e-20	1.33807e-16	35.563
11736247_x_at	347902	AMIGO2	adhesion molecule with Ig like domain 2	4.40549	11.1538	57.5556	1.07016e-21	1.05935e-17	39.3244
11736246_a_at	347902	AMIGO2	adhesion molecule with Ig like domain 2	4.37467	8.46231	26.8253	7.38074e-16	1.54792e-13	26.6338
11726396_x_at	3730	ANOS1	anosmin 1	4.37102	5.85653	26.8054	7.47652e-16	1.56139e-13	26.6209
11758166_s_at	3730	ANOS1	anosmin 1	4.34995	6.913	34.5024	9.02253e-18	4.51081e-15	30.9903
11736281_a_at	6581	SLC22A3	solute carrier family 22 member 3	4.23238	4.34904	23.2553	8.79445e-15	1.17962e-12	24.1334
11726527_s_at	9848	MFAP3L	microfibrillar associated protein 3 like	4.22506	7.1671	35.1055	6.65366e-18	3.50594e-15	31.2862
11731445_at	27063	ANKRD1	ankyrin repeat domain 1	4.19074	5.23802	16.7354	2.41648e-12	1.25239e-10	18.383
11735946_at	131368	ZPLD1	zona pellucida like domain containing 1	4.12144	6.10487	31.798	3.78025e-17	1.46175e-14	29.588
11716149_a_at	56937	PMEPA1	prostate transmembrane protein, androgen induced 1	4.10408	9.47709	45.6408	6.50396e-20	1.26722e-16	35.6692
11747890_a_at	1503	CTPS1	CTP synthase 1	4.04713	7.27659	46.4199	4.82161e-20	1.1152e-16	35.9441
11758064_s_at	8325	FZD8	frizzled class receptor 8	4.02516	9.38442	27.153	5.97345e-16	1.31403e-13	26.8459
11716150_a_at	56937	PMEPA1	prostate transmembrane protein, androgen induced 1	3.96461	7.86361	40.9464	4.42294e-19	4.75899e-16	33.8821
11744233_at	8325	FZD8	frizzled class receptor 8	3.93204	8.97784	44.6168	9.71306e-20	1.5508e-16	35.2991
11715793_a_at	72	ACTG2	actin, gamma 2, smooth muscle, enteric	3.92024	8.22199	22.6236	1.41493e-14	1.69159e-12	23.6505
11716151_a_at	56937	PMEPA1	prostate transmembrane protein, androgen induced 1	3.88553	9.39377	53.3746	4.07356e-21	1.87058e-17	38.1642
11731114_a_at	6445	SGCG	sarcoglycan gamma	3.86659	7.3203	26.1836	1.1248e-15	2.12102e-13	26.2108
11735218_at	1300	COL10A1	collagen type X alpha 1 chain	3.81103	6.69099	27.084	6.24422e-16	1.36149e-13	26.8015
11739768_a_at	5791	PTPRE	protein tyrosine phosphatase, receptor type E	3.77894	6.75897	40.3696	5.6808e-19	5.85773e-16	33.6456
11748016_a_at	72	ACTG2	actin, gamma 2, smooth muscle, enteric	3.77181	9.71425	26.9622	6.75461e-16	1.44024e-13	26.7227
11743908_a_at	1503	CTPS1	CTP synthase 1	3.76531	10.3775	52.57	5.33143e-21	2.19899e-17	37.927
11743907_a_at	1503	CTPS1	CTP synthase 1	3.76036	8.7726	46.7158	4.30919e-20	1.06642e-16	36.047
11715794_x_at	72	ACTG2	actin, gamma 2, smooth muscle, enteric	3.74638	9.43085	41.1178	4.10865e-19	4.51906e-16	33.9516
11734417_a_at	256691	MAMDC2	MAM domain containing 2	3.74555	8.83938	37.7102	1.88832e-18	1.35453e-15	32.5012
11727690_at	3589	IL11	interleukin 11	3.74294	8.41916	50.0919	1.25373e-20	3.87833e-17	37.1656
11735867_a_at	389336	C5orf46	chromosome 5 open reading frame 46	3.7302	6.82021	22.7951	1.24203e-14	1.53685e-12	23.7829
11750141_a_at	1503	CTPS1	CTP synthase 1	3.63305	9.46392	44.8317	8.92248e-20	1.47206e-16	35.3776
11754941_x_at	3875	KRT18	keratin 18	3.52544	7.13149	26.3921	9.79874e-16	1.93223e-13	26.3494
11725983_at	8553	BHLHE40	basic helix-loop-helix family member e40	3.49201	8.42423	41.2514	3.88016e-19	4.36473e-16	34.0056
11743948_at	654	BMP6	bone morphogenetic protein 6	3.47138	7.29932	27.344	5.28667e-16	1.18938e-13	26.9682
11724944_at	64084	CLSTN2	calsyntenin 2	3.42633	5.99562	27.6559	4.33842e-16	1.00812e-13	27.166
11728520_a_at	196051	PLPP4	phospholipid phosphatase 4	3.42342	7.61247	46.2212	5.20165e-20	1.11937e-16	35.8745
11755046_a_at	8877	SPHK1	sphingosine kinase 1	3.42304	8.4699	20.3382	8.82635e-14	7.69245e-12	21.7834
11723174_a_at	84624	FNDC1	fibronectin type III domain containing 1	3.34711	7.97482	28.7923	2.14837e-16	5.72434e-14	27.8674
11758869_at	59	ACTA2	actin, alpha 2, smooth muscle, aorta	3.27456	5.85104	16.5281	2.97923e-12	1.49854e-10	18.1671
11731197_a_at	79899	PRR5L	proline rich 5 like	3.23275	6.82453	42.0785	2.73315e-19	3.22089e-16	34.335
11726024_at	1906	EDN1	endothelin 1	3.21394	7.25499	24.4412	3.71846e-15	6.0003e-13	25.0053
11719898_s_at	1839	HBEGF	heparin binding EGF like growth factor	3.19165	9.08406	25.3819	1.93107e-15	3.45048e-13	25.6668
11739553_a_at	8522	GAS7	growth arrest specific 7	3.14457	6.7394	34.2729	1.01454e-17	4.92299e-15	30.8761
11722200_s_at	8038	ADAM12	ADAM metallopeptidase domain 12	3.10269	10.024	46.3473	4.95694e-20	1.1152e-16	35.9187
11756007_a_at	64399	HHIP	hedgehog interacting protein	3.08912	4.58868	29.2133	1.66716e-16	4.7152e-14	28.1198
11727273_a_at	357	SHROOM2	shroom family member 2	3.08875	5.54051	28.1383	3.2086e-16	7.82313e-14	27.4675
11726023_a_at	1906	EDN1	endothelin 1	3.072	8.07161	36.8857	2.78689e-18	1.81496e-15	32.1273
11722327_at	79605	PGBD5	piggyBac transposable element derived 5	3.05354	6.29192	13.337	1.03715e-10	3.10134e-09	14.4949
11739972_at	9891	NUAK1	NUAK family kinase 1	3.03052	8.88126	38.1552	1.53578e-18	1.15172e-15	32.6992
11727127_at	7306	TYRP1	tyrosinase related protein 1	3.01838	5.03025	18.5773	4.13704e-13	2.80882e-11	20.1997
11726333_s_at	51176	LEF1	lymphoid enhancer binding factor 1	2.97632	5.60773	22.7231	1.31174e-14	1.5878e-12	23.7274
11736086_a_at	64399	HHIP	hedgehog interacting protein	2.97413	4.05464	29.5903	1.33241e-16	3.99684e-14	28.3425
11724587_a_at	6857	SYT1	synaptotagmin 1	2.96066	7.26591	35.1474	6.51552e-18	3.50528e-15	31.3066
11746928_a_at	8507	ENC1	ectodermal-neural cortex 1	2.9274	8.03718	19.6237	1.62677e-13	1.30076e-11	21.1574
11757905_x_at	3875	KRT18	keratin 18	2.90809	7.30095	24.0867	4.78955e-15	7.31663e-13	24.7493
11719949_a_at	54908	SPDL1	spindle apparatus coiled-coil protein 1	2.898	9.4618	42.2735	2.519e-19	3.11694e-16	34.4115
11753500_x_at	9456	HOMER1	homer scaffolding protein 1	2.89516	7.01312	34.5418	8.84371e-18	4.51081e-15	31.0097
11725386_a_at	9456	HOMER1	homer scaffolding protein 1	2.87386	6.84505	21.189	4.3707e-14	4.29002e-12	22.5016
11721031_a_at	6450	SH3BGR	SH3 domain binding glutamate rich protein	2.8565	8.702	34.0741	1.1237e-17	5.24692e-15	30.7765
11739973_s_at	9891	NUAK1	NUAK family kinase 1	2.84472	9.77227	37.0224	2.61121e-18	1.74651e-15	32.19
11743548_a_at	63027	SLC22A23	solute carrier family 22 member 23	2.83201	6.86517	24.9053	2.68357e-15	4.5178e-13	25.3348
11725517_x_at	9619	ABCG1	ATP binding cassette subfamily G member 1	2.82971	6.68109	31.6191	4.17316e-17	1.57672e-14	29.4907
11722598_s_at	57007	ACKR3	atypical chemokine receptor 3	2.82093	6.24484	23.9956	5.11452e-15	7.6916e-13	24.6828
11743636_at	7130	TNFAIP6	TNF alpha induced protein 6	2.79918	10.4958	43.0858	1.79995e-19	2.54539e-16	34.7258
11745836_x_at	8291	DYSF	dysferlin	2.78997	7.24888	17.6644	9.71868e-13	5.76079e-11	19.3215
11724586_a_at	6857	SYT1	synaptotagmin 1	2.77486	6.24063	32.4379	2.66556e-17	1.06397e-14	29.9315
11731263_a_at	22891	ZNF365	zinc finger protein 365	2.76872	7.66232	32.529	2.53771e-17	1.02117e-14	29.9797
11725429_at	27074	LAMP3	lysosomal associated membrane protein 3	2.76201	5.00095	28.6135	2.39532e-16	6.23982e-14	27.759
11735219_at	1300	COL10A1	collagen type X alpha 1 chain	2.72643	6.19822	16.1412	4.43157e-12	2.07316e-10	17.7573
11744737_a_at	219790	RTKN2	rhotekin 2	2.72321	6.89413	26.2644	1.06615e-15	2.06938e-13	26.2646
11734418_s_at	256691	MAMDC2	MAM domain containing 2	2.71799	11.2126	18.1467	6.15968e-13	3.92372e-11	19.7906
11725387_x_at	9456	HOMER1	homer scaffolding protein 1	2.71302	6.90161	24.1767	4.49008e-15	7.01061e-13	24.8146
11737315_at	83849	SYT15	synaptotagmin 15	2.69923	4.77417	16.843	2.16957e-12	1.14481e-10	18.4942
11737315_at	102724488	LOC102724488	synaptotagmin-15	2.69923	4.77417	16.843	2.16957e-12	1.14481e-10	18.4942
11729574_at	8507	ENC1	ectodermal-neural cortex 1	2.69847	10.7213	33.2719	1.70743e-17	7.23898e-15	30.368
11757570_s_at	222171	PRR15	proline rich 15	2.69578	3.97705	13.8233	5.77867e-11	1.89164e-09	15.101
11755981_a_at	1839	HBEGF	heparin binding EGF like growth factor	2.69331	5.88868	12.3877	3.42333e-10	8.70697e-09	13.2564
11756903_a_at	55733	HHAT	hedgehog acyltransferase	2.69107	6.99248	27.4973	4.79585e-16	1.10467e-13	27.0658
11757865_a_at	4616	GADD45B	growth arrest and DNA damage inducible beta	2.67921	9.52221	38.7329	1.1785e-18	9.72162e-16	32.9522
11722199_at	8038	ADAM12	ADAM metallopeptidase domain 12	2.67135	10.2714	42.0863	2.72431e-19	3.22089e-16	34.338
11725516_s_at	9619	ABCG1	ATP binding cassette subfamily G member 1	2.67066	6.26039	17.5173	1.1194e-12	6.48011e-11	19.176
11725515_a_at	9619	ABCG1	ATP binding cassette subfamily G member 1	2.6687	6.68888	30.3665	8.47084e-17	2.77659e-14	28.7916
11724585_a_at	6857	SYT1	synaptotagmin 1	2.66452	6.73125	29.442	1.45475e-16	4.23547e-14	28.2552
11718790_at	55502	HES6	hes family bHLH transcription factor 6	2.66315	6.35962	22.2508	1.88437e-14	2.17405e-12	23.359
11735385_s_at	51339	DACT1	dishevelled binding antagonist of beta catenin 1	2.63395	9.79142	39.6789	7.70167e-19	7.47439e-16	33.3571
11728110_at	23426	GRIP1	glutamate receptor interacting protein 1	2.62808	3.86829	20.6398	6.85848e-14	6.20586e-12	22.0414
11728390_at	10100	TSPAN2	tetraspanin 2	2.62213	8.42513	24.1662	4.52388e-15	7.0191e-13	24.807
11736280_at	6581	SLC22A3	solute carrier family 22 member 3	2.62095	4.04531	16.1634	4.33069e-12	2.03753e-10	17.7811
11725388_a_at	9456	HOMER1	homer scaffolding protein 1	2.61687	6.11327	19.7627	1.44201e-13	1.17388e-11	21.2809
11717516_s_at	80303	EFHD1	EF-hand domain family member D1	2.61085	5.78353	14.2281	3.59814e-11	1.26186e-09	15.5917
11725087_at	55915	LANCL2	LanC like 2	2.5948	6.64892	25.7524	1.50127e-15	2.75205e-13	25.9204
11733707_x_at	1301	COL11A1	collagen type XI alpha 1 chain	2.59319	7.46556	26.7518	7.74159e-16	1.59942e-13	26.586
11758842_at	7057	THBS1	thrombospondin 1	2.58523	9.27557	35.9498	4.38058e-18	2.64411e-15	31.691
11727069_at	219699	UNC5B	unc-5 netrin receptor B	2.585	7.33232	21.5924	3.16043e-14	3.34958e-12	22.8323
11750935_a_at	654	BMP6	bone morphogenetic protein 6	2.57253	6.13127	19.0504	2.69722e-13	1.97192e-11	20.6389
11717272_at	1289	COL5A1	collagen type V alpha 1 chain	2.56923	11.4226	31.3646	4.80804e-17	1.76277e-14	29.3511
11754862_a_at	5919	RARRES2	retinoic acid receptor responder 2	2.56083	9.4552	30.8811	6.31185e-17	2.18465e-14	29.0825
11725364_x_at	8522	GAS7	growth arrest specific 7	2.55989	6.74877	22.0875	2.13947e-14	2.41531e-12	23.2298
11732993_a_at	5999	RGS4	regulator of G-protein signaling 4	2.54022	8.92676	28.4012	2.72791e-16	6.8191e-14	27.6294
11723644_a_at	5350	PLN	phospholamban	2.53948	7.34634	24.4275	3.75488e-15	6.03402e-13	24.9955
11735570_a_at	8470	SORBS2	sorbin and SH3 domain containing 2	2.53576	4.02055	16.3816	3.45918e-12	1.69517e-10	18.013
11741678_a_at	5270	SERPINE2	serpin family E member 2	2.53031	9.76978	34.3501	9.75192e-18	4.77892e-15	30.9146
11751904_x_at	1301	COL11A1	collagen type XI alpha 1 chain	2.52023	7.60572	38.2686	1.45754e-18	1.1451e-15	32.7492
11725766_x_at	1301	COL11A1	collagen type XI alpha 1 chain	2.51421	7.44233	22.0818	2.14894e-14	2.41731e-12	23.2253
11744165_a_at	51400	PPME1	protein phosphatase methylesterase 1	2.50604	8.378	26.2184	1.09911e-15	2.10041e-13	26.234
11733706_s_at	1301	COL11A1	collagen type XI alpha 1 chain	2.50399	7.74588	18.6873	3.74195e-13	2.57591e-11	20.3028
11735386_a_at	51339	DACT1	dishevelled binding antagonist of beta catenin 1	2.5001	7.30698	32.785	2.2116e-17	9.12194e-15	30.1146
11720489_a_at	70	ACTC1	actin, alpha, cardiac muscle 1	2.49596	7.57217	17.314	1.3633e-12	7.70279e-11	18.973
11717560_at	6578	SLCO2A1	solute carrier organic anion transporter family member 2A1	2.49571	5.48015	16.0325	4.96174e-12	2.29369e-10	17.6406
11725765_a_at	1301	COL11A1	collagen type XI alpha 1 chain	2.4931	7.0118	21.3219	3.92534e-14	4.01415e-12	22.6112
11730961_a_at	7168	TPM1	tropomyosin 1 (alpha)	2.4776	8.70869	26.0735	1.21039e-15	2.25219e-13	26.137
11761440_a_at	9645	MICAL2	microtubule associated monooxygenase, calponin and LIM domain containing 2	2.47138	8.47812	24.0533	4.90619e-15	7.42605e-13	24.7249
11736813_at	80380	PDCD1LG2	programmed cell death 1 ligand 2	2.46992	7.91292	31.5357	4.371e-17	1.62664e-14	29.445
11731196_a_at	79899	PRR5L	proline rich 5 like	2.46927	7.44689	19.3676	2.03563e-13	1.56693e-11	20.9276
11732994_a_at	5999	RGS4	regulator of G-protein signaling 4	2.46095	7.44439	22.2303	1.91463e-14	2.19872e-12	23.3428
11723645_at	5350	PLN	phospholamban	2.4555	7.25933	24.0619	4.87573e-15	7.40259e-13	24.7312
11755762_a_at	23670	TMEM2	transmembrane protein 2	2.44809	8.79337	40.2766	5.91668e-19	5.97645e-16	33.6071
11717124_at	9148	NEURL1	neuralized E3 ubiquitin protein ligase 1	2.44751	6.96886	16.2465	3.97444e-12	1.90431e-10	17.8697
11717124_at	9644	SH3PXD2A	SH3 and PX domains 2A	2.44751	6.96886	16.2465	3.97444e-12	1.90431e-10	17.8697
11759549_a_at	9645	MICAL2	microtubule associated monooxygenase, calponin and LIM domain containing 2	2.44743	10.6654	26.2088	1.10615e-15	2.10409e-13	26.2276
11759693_at	219790	RTKN2	rhotekin 2	2.44286	5.05352	20.226	9.70244e-14	8.39549e-12	21.6866
11726130_a_at	5318	PKP2	plakophilin 2	2.43062	5.13577	22.8758	1.16855e-14	1.46054e-12	23.8449
11729099_a_at	3556	IL1RAP	interleukin 1 receptor accessory protein	2.43059	8.29423	26.5351	8.91914e-16	1.79452e-13	26.4438
11730207_at	116984	ARAP2	ArfGAP with RhoGAP domain, ankyrin repeat and PH domain 2	2.42924	3.19555	16.764	2.34809e-12	1.22207e-10	18.4126
11757721_s_at	64651	CSRNP1	cysteine and serine rich nuclear protein 1	2.42741	8.56145	28.925	1.98267e-16	5.39188e-14	27.9474
11716130_a_at	10272	FSTL3	follistatin like 3	2.42646	5.31496	13.092	1.40188e-10	4.0482e-09	14.1825
11733229_a_at	5787	PTPRB	protein tyrosine phosphatase, receptor type B	2.42625	3.23816	19.4316	1.92425e-13	1.49749e-11	20.9853
11726492_a_at	9619	ABCG1	ATP binding cassette subfamily G member 1	2.41615	5.20333	28.3735	2.77478e-16	6.90138e-14	27.6124
11729818_s_at	3479	IGF1	insulin like growth factor 1	2.40559	7.95233	27.2805	5.50538e-16	1.22192e-13	26.9276
11728828_at	2150	F2RL1	F2R like trypsin receptor 1	2.40083	6.15005	15.6257	7.62086e-12	3.28567e-10	17.1973
11740370_a_at	10125	RASGRP1	RAS guanyl releasing protein 1	2.3919	4.95546	22.7415	1.29354e-14	1.57694e-12	23.7416
11728304_at	79953	SYNDIG1	synapse differentiation inducing 1	2.38869	5.90444	20.8246	5.88657e-14	5.46634e-12	22.1975
11719003_x_at	56172	ANKH	ANKH inorganic pyrophosphate transport regulator	2.3881	5.13165	17.3432	1.32507e-12	7.53844e-11	19.0023
11723559_a_at	56935	SMCO4	single-pass membrane protein with coiled-coil domains 4	2.37327	6.82082	29.1292	1.75331e-16	4.84805e-14	28.0697
11752173_a_at	23670	TMEM2	transmembrane protein 2	2.37104	7.11277	22.7731	1.26293e-14	1.55108e-12	23.766
11759525_at	4616	GADD45B	growth arrest and DNA damage inducible beta	2.3667	10.9336	26.4789	9.25423e-16	1.83951e-13	26.4068
11716132_a_at	10272	FSTL3	follistatin like 3	2.3619	10.2637	23.3501	8.19767e-15	1.11163e-12	24.2047
11718605_a_at	11341	SCRG1	stimulator of chondrogenesis 1	2.36112	7.42045	19.1166	2.5425e-13	1.87822e-11	20.6995
11728389_at	10100	TSPAN2	tetraspanin 2	2.35762	7.68009	20.7415	6.30409e-14	5.76749e-12	22.1275
11735134_a_at	7093	TLL2	tolloid like 2	2.3536	4.17517	21.0159	5.03179e-14	4.78939e-12	22.3578
11718399_s_at	7052	TGM2	transglutaminase 2	2.35232	10.199	31.0091	5.87086e-17	2.09049e-14	29.154
11724131_at	2674	GFRA1	GDNF family receptor alpha 1	2.35232	7.21656	26.2042	1.10954e-15	2.10409e-13	26.2245
11739976_a_at	22801	ITGA11	integrin subunit alpha 11	2.34926	8.35977	18.6631	3.82527e-13	2.62596e-11	20.2802
11745102_a_at	50507	NOX4	NADPH oxidase 4	2.3465	7.34393	29.6051	1.32079e-16	3.98612e-14	28.3512
11757502_x_at	11341	SCRG1	stimulator of chondrogenesis 1	2.34608	7.32652	16.6861	2.53927e-12	1.30782e-10	18.3319
11734811_a_at	1959	EGR2	early growth response 2	2.34074	5.23331	17.9493	7.41379e-13	4.58682e-11	19.6
11726131_a_at	5318	PKP2	plakophilin 2	2.34024	5.16129	13.0676	1.44501e-10	4.1582e-09	14.151
11760186_at	59	ACTA2	actin, alpha 2, smooth muscle, aorta	2.34022	7.10408	17.9506	7.40446e-13	4.58678e-11	19.6013
11754812_a_at	4862	NPAS2	neuronal PAS domain protein 2	2.33586	7.43396	18.8138	3.3366e-13	2.34915e-11	20.4206
11731431_at	57575	PCDH10	protocadherin 10	2.32179	5.95489	12.583	2.66184e-10	7.00412e-09	13.5174
11728388_at	10100	TSPAN2	tetraspanin 2	2.31263	8.34997	22.6302	1.40784e-14	1.6872e-12	23.6556
11744799_a_at	7518	XRCC4	X-ray repair cross complementing 4	2.3043	7.64296	21.0424	4.92384e-14	4.69567e-12	22.3799
11757557_s_at	23705	CADM1	cell adhesion molecule 1	2.30064	8.62637	23.7192	6.25e-15	8.96648e-13	24.4797
11723561_x_at	56935	SMCO4	single-pass membrane protein with coiled-coil domains 4	2.29972	8.73076	27.8122	3.93218e-16	9.22384e-14	27.2643
11755242_a_at	6498	SKIL	SKI like proto-oncogene	2.28339	6.17035	17.2946	1.38936e-12	7.81435e-11	18.9535
11732415_s_at	7074	TIAM1	T-cell lymphoma invasion and metastasis 1	2.274	5.09942	15.2139	1.18861e-11	4.838e-10	16.7379
11740507_a_at	23092	ARHGAP26	Rho GTPase activating protein 26	2.27289	4.38187	11.8658	6.81302e-10	1.58018e-08	12.5422
11725086_s_at	55915	LANCL2	LanC like 2	2.26327	9.42294	25.3965	1.91188e-15	3.44103e-13	25.6768
11723560_at	56935	SMCO4	single-pass membrane protein with coiled-coil domains 4	2.26046	8.2036	27.3217	5.36264e-16	1.19719e-13	26.9539
11754473_a_at	23705	CADM1	cell adhesion molecule 1	2.26036	7.41159	12.4659	3.09408e-10	7.99277e-09	13.3613
11743506_a_at	23092	ARHGAP26	Rho GTPase activating protein 26	2.25247	4.83764	14.9538	1.58239e-11	6.18645e-10	16.442
11741910_s_at	63876	PKNOX2	PBX/knotted 1 homeobox 2	2.24722	5.21594	14.8011	1.87556e-11	7.14085e-10	16.2661
11750735_a_at	1311	COMP	cartilage oligomeric matrix protein	2.24643	9.06659	16.396	3.40856e-12	1.677e-10	18.0282
11736283_s_at	4824	NKX3-1	NK3 homeobox 1	2.24484	7.24248	22.4608	1.60264e-14	1.86641e-12	23.5238
11728806_a_at	23705	CADM1	cell adhesion molecule 1	2.24272	9.27485	29.3702	1.51817e-16	4.36871e-14	28.2129
11727063_a_at	7371	UCK2	uridine-cytidine kinase 2	2.23894	9.87303	35.3377	5.92539e-18	3.29525e-15	31.3986
11741153_a_at	4688	NCF2	neutrophil cytosolic factor 2	2.23603	4.92262	16.4859	3.10979e-12	1.55631e-10	18.1228
11741625_a_at	63027	SLC22A23	solute carrier family 22 member 23	2.22696	7.22107	22.2702	1.85625e-14	2.14661e-12	23.3743
11725547_a_at	4978	OPCML	opioid binding protein/cell adhesion molecule like	2.22425	5.43097	23.2424	8.87969e-15	1.18464e-12	24.1236
11754706_a_at	64399	HHIP	hedgehog interacting protein	2.21688	5.59046	18.1205	6.3124e-13	3.9953e-11	19.7654
11734829_a_at	10216	PRG4	proteoglycan 4	2.21563	5.62798	13.9033	5.25733e-11	1.74639e-09	15.199
11728331_a_at	79047	KCTD15	potassium channel tetramerization domain containing 15	2.20974	7.25074	17.6849	9.53014e-13	5.6694e-11	19.3416
11722352_s_at	59	ACTA2	actin, alpha 2, smooth muscle, aorta	2.20848	12.6437	32.6366	2.3948e-17	9.71561e-15	30.0366
11727221_at	64131	XYLT1	xylosyltransferase 1	2.2077	11.1441	23.7988	5.89793e-15	8.56064e-13	24.5385
11725853_a_at	7518	XRCC4	X-ray repair cross complementing 4	2.20599	8.1287	15.7672	6.55726e-12	2.91339e-10	17.3526
11741375_a_at	23705	CADM1	cell adhesion molecule 1	2.20203	6.36388	16.4442	3.24505e-12	1.60614e-10	18.0789
11728564_at	219790	RTKN2	rhotekin 2	2.19953	5.74128	17.159	1.58651e-12	8.73461e-11	18.8168
11729817_a_at	3479	IGF1	insulin like growth factor 1	2.18764	8.11608	23.5906	6.86647e-15	9.655e-13	24.3844
11724383_at	84620	ST6GAL2	ST6 beta-galactoside alpha-2,6-sialyltransferase 2	2.18543	3.8587	15.9105	5.63772e-12	2.5647e-10	17.5087
11741553_a_at	6498	SKIL	SKI like proto-oncogene	2.18231	8.35427	12.6107	2.56898e-10	6.81414e-09	13.5543
11725482_a_at	4148	MATN3	matrilin 3	2.17681	7.29676	23.8685	5.60689e-15	8.21045e-13	24.5897
11740041_at	57194	ATP10A	ATPase phospholipid transporting 10A (putative)	2.17477	8.19846	21.5969	3.1492e-14	3.34484e-12	22.8359
11727447_a_at	81849	ST6GALNAC5	ST6 N-acetylgalactosaminide alpha-2,6-sialyltransferase 5	2.1745	6.34429	18.9065	3.06888e-13	2.19818e-11	20.5064
11757960_s_at	116984	ARAP2	ArfGAP with RhoGAP domain, ankyrin repeat and PH domain 2	2.17126	4.52222	19.1023	2.57508e-13	1.89418e-11	20.6865
11741535_a_at	23670	TMEM2	transmembrane protein 2	2.15688	9.50567	36.9767	2.66861e-18	1.76111e-15	32.169
11755757_a_at	23336	SYNM	synemin	2.15559	8.14051	31.6506	4.10096e-17	1.56136e-14	29.5079
11740508_s_at	23092	ARHGAP26	Rho GTPase activating protein 26	2.15078	6.26403	15.1544	1.26861e-11	5.10073e-10	16.6705
11741323_a_at	7518	XRCC4	X-ray repair cross complementing 4	2.14847	8.52635	21.216	4.27612e-14	4.24142e-12	22.5239
11758546_x_at	7421	VDR	vitamin D (1,25- dihydroxyvitamin D3) receptor	2.14403	9.30069	29.1364	1.74571e-16	4.84805e-14	28.074
11759497_at	50515	CHST11	carbohydrate sulfotransferase 11	2.13251	6.7442	21.176	4.41684e-14	4.32038e-12	22.4909
11734311_s_at	1264	CNN1	calponin 1	2.13093	10.3218	23.6126	6.75644e-15	9.52735e-13	24.4008
11724989_a_at	8218	CLTCL1	clathrin heavy chain like 1	2.12924	6.63869	17.1265	1.63797e-12	8.98797e-11	18.7839
11727117_at	4879	NPPB	natriuretic peptide B	2.12508	6.34873	18.9319	2.99946e-13	2.15157e-11	20.5299
11755284_s_at	27075	TSPAN13	tetraspanin 13	2.12196	9.09688	19.1236	2.52659e-13	1.86926e-11	20.706
11729621_at	1183	CLCN4	chloride voltage-gated channel 4	2.12095	5.62276	19.6253	1.62455e-13	1.30076e-11	21.1588
11734310_a_at	1264	CNN1	calponin 1	2.1136	9.04388	20.1966	9.94711e-14	8.59218e-12	21.6611
11742712_a_at	7058	THBS2	thrombospondin 2	2.10937	10.384	23.0571	1.01961e-14	1.31421e-12	23.9833
11734404_s_at	132430	PABPC4L	poly(A) binding protein cytoplasmic 4 like	2.1067	7.57427	26.9547	6.78726e-16	1.44024e-13	26.7179
11756773_a_at	84978	FRMD5	FERM domain containing 5	2.10309	5.25438	14.7266	2.03874e-11	7.66772e-10	16.1798
11717154_a_at	5328	PLAU	plasminogen activator, urokinase	2.10267	8.18725	22.4708	1.59046e-14	1.86099e-12	23.5315
11727181_a_at	6498	SKIL	SKI like proto-oncogene	2.10219	7.60196	12.1087	4.93115e-10	1.19758e-08	12.8777
11758536_s_at	79047	KCTD15	potassium channel tetramerization domain containing 15	2.1007	7.48177	18.5428	4.26971e-13	2.87914e-11	20.1673
11742478_a_at	3084	NRG1	neuregulin 1	2.10045	4.7826	7.93984	2.92218e-07	3.23849e-06	6.25221
11764160_at	100507420	LINC01605	long intergenic non-protein coding RNA 1605	2.09967	5.16864	17.8279	8.31608e-13	5.05343e-11	19.4819
11720030_a_at	7857	SCG2	secretogranin II	2.09906	7.3809	17.7901	8.62059e-13	5.20972e-11	19.4449
11733954_at	55356	SLC22A15	solute carrier family 22 member 15	2.09369	4.6406	11.499	1.12132e-09	2.45682e-08	12.025
11733955_at	55356	SLC22A15	solute carrier family 22 member 15	2.09222	7.23608	21.1362	4.56174e-14	4.40983e-12	22.4579
11720367_a_at	23670	TMEM2	transmembrane protein 2	2.09202	9.43632	33.9277	1.21199e-17	5.48828e-15	30.7027
11738028_a_at	284217	LAMA1	laminin subunit alpha 1	2.08699	6.48544	28.0057	3.48436e-16	8.33133e-14	27.3851
11736812_at	80380	PDCD1LG2	programmed cell death 1 ligand 2	2.07738	5.89004	25.9033	1.35636e-15	2.49564e-13	26.0225
11758968_at	219699	UNC5B	unc-5 netrin receptor B	2.07631	8.86726	21.3889	3.71937e-14	3.82724e-12	22.6662
11718908_s_at	9435	CHST2	carbohydrate sulfotransferase 2	2.07535	7.50341	16.4834	3.11772e-12	1.55743e-10	18.1202
11718909_x_at	9435	CHST2	carbohydrate sulfotransferase 2	2.07511	8.04895	23.1506	9.50775e-15	1.24494e-12	24.0543
11754483_a_at	221749	PXDC1	PX domain containing 1	2.07429	10.151	25.3412	1.98569e-15	3.53531e-13	25.6386
11741536_x_at	23670	TMEM2	transmembrane protein 2	2.07326	9.50459	30.5652	7.55673e-17	2.52716e-14	28.9046
11724990_s_at	8218	CLTCL1	clathrin heavy chain like 1	2.07227	8.13151	25.6378	1.62227e-15	2.952e-13	25.8423
11739781_a_at	7052	TGM2	transglutaminase 2	2.06971	7.0943	12.3591	3.55264e-10	8.99428e-09	13.2179
11728234_a_at	9076	CLDN1	claudin 1	2.06835	6.1979	21.6488	3.02187e-14	3.23739e-12	22.878
11729250_at	8707	B3GALT2	beta-1,3-galactosyltransferase 2	2.06535	6.77969	16.7089	2.48178e-12	1.28087e-10	18.3555
11721993_at	6533	SLC6A6	solute carrier family 6 member 6	2.06297	9.39869	27.009	6.55349e-16	1.40418e-13	26.753
11756810_a_at	4237	MFAP2	microfibrillar associated protein 2	2.06071	10.1563	30.5447	7.64604e-17	2.53987e-14	28.8929
11754774_s_at	4862	NPAS2	neuronal PAS domain protein 2	2.05419	7.44588	12.5796	2.6733e-10	7.02308e-09	13.513
11743576_at	1363	CPE	carboxypeptidase E	2.04827	8.5992	29.4309	1.46433e-16	4.23841e-14	28.2487
11759496_at	50515	CHST11	carbohydrate sulfotransferase 11	2.04214	5.9043	13.139	1.32255e-10	3.83928e-09	14.2429
11715437_at	7078	TIMP3	TIMP metallopeptidase inhibitor 3	2.04035	10.8934	21.2076	4.30522e-14	4.26017e-12	22.517
11745020_a_at	51330	TNFRSF12A	TNF receptor superfamily member 12A	2.03764	10.2807	21.447	3.5499e-14	3.67599e-12	22.7138
11746433_a_at	9076	CLDN1	claudin 1	2.03474	3.96399	12.1193	4.86288e-10	1.18439e-08	12.8921
11747736_s_at	1264	CNN1	calponin 1	2.03053	7.9399	19.9883	1.18776e-13	9.9967e-12	21.4796
11728920_a_at	10125	RASGRP1	RAS guanyl releasing protein 1	2.03003	5.37368	15.6985	7.0528e-12	3.09397e-10	17.2774
11731475_a_at	6424	SFRP4	secreted frizzled related protein 4	2.02637	6.64078	14.4077	2.92656e-11	1.05269e-09	15.8056
11717657_a_at	2146	EZH2	enhancer of zeste 2 polycomb repressive complex 2 subunit	2.0195	7.21035	15.0557	1.41384e-11	5.60271e-10	16.5584
11727448_x_at	81849	ST6GALNAC5	ST6 N-acetylgalactosaminide alpha-2,6-sialyltransferase 5	2.01228	6.12664	17.0944	1.69062e-12	9.20543e-11	18.7513
11748647_a_at	5801	PTPRR	protein tyrosine phosphatase, receptor type R	2.00439	3.53856	16.3364	3.62341e-12	1.75499e-10	17.9651
11717126_at	9644	SH3PXD2A	SH3 and PX domains 2A	2.00355	8.08086	16.0651	4.79632e-12	2.22279e-10	17.6756
11743577_s_at	1363	CPE	carboxypeptidase E	2.00346	8.03592	15.5512	8.25289e-12	3.52743e-10	17.115
11737749_a_at	6446	SGK1	serum/glucocorticoid regulated kinase 1	1.99953	9.4018	25.0239	2.47114e-15	4.23214e-13	25.4181
11716131_s_at	10272	FSTL3	follistatin like 3	1.99907	7.57622	18.8172	3.32635e-13	2.34861e-11	20.4237
11723605_a_at	91523	PCED1B	PC-esterase domain containing 1B	1.99781	6.1766	16.5571	2.89283e-12	1.46401e-10	18.1974
11738808_a_at	114884	OSBPL10	oxysterol binding protein like 10	1.99577	7.57605	27.4379	4.98021e-16	1.13592e-13	27.028
11731126_at	727936	GXYLT2	glucoside xylosyltransferase 2	1.99394	9.26415	23.9909	5.1318e-15	7.6916e-13	24.6794
11719811_a_at	57761	TRIB3	tribbles pseudokinase 3	1.98501	10.2201	22.9565	1.09964e-14	1.39915e-12	23.9066
11744289_a_at	23210	JMJD6	arginine demethylase and lysine hydroxylase	1.98431	7.97658	18.9524	2.94486e-13	2.12782e-11	20.5488
11732315_a_at	6444	SGCD	sarcoglycan delta	1.9828	8.73421	22.9969	1.06677e-14	1.36433e-12	23.9374
11716665_s_at	9518	GDF15	growth differentiation factor 15	1.98171	8.68317	22.9115	1.13749e-14	1.43258e-12	23.8722
11743350_a_at	84419	C15orf48	chromosome 15 open reading frame 48	1.98093	6.60206	19.4546	1.88569e-13	1.47211e-11	21.006
11725085_a_at	55915	LANCL2	LanC like 2	1.97509	9.25478	28.427	2.68508e-16	6.74609e-14	27.6452
11756098_a_at	94122	SYTL5	synaptotagmin like 5	1.97437	4.60126	12.6066	2.58254e-10	6.83911e-09	13.5488
11723149_a_at	10560	SLC19A2	solute carrier family 19 member 2	1.97421	8.12931	17.2601	1.4369e-12	8.00895e-11	18.9188
11744616_a_at	10560	SLC19A2	solute carrier family 19 member 2	1.97421	8.12931	17.2601	1.4369e-12	8.00895e-11	18.9188
11717274_s_at	1289	COL5A1	collagen type V alpha 1 chain	1.96833	10.4922	24.2816	4.16542e-15	6.62917e-13	24.8905
11736262_at	83729	INHBE	inhibin beta E subunit	1.96803	7.12538	17.5092	1.12822e-12	6.5235e-11	19.1679
11726615_a_at	1000	CDH2	cadherin 2	1.96541	10.394	22.0158	2.26264e-14	2.51628e-12	23.1728
11740799_x_at	114299	PALM2	paralemmin 2	1.96136	5.18879	17.7236	9.18422e-13	5.49001e-11	19.3797
11733045_at	6542	SLC7A2	solute carrier family 7 member 2	1.95983	4.67444	13.5062	8.44438e-11	2.6303e-09	14.7079
11751172_a_at	57761	TRIB3	tribbles pseudokinase 3	1.95686	7.21867	18.0518	6.73216e-13	4.2225e-11	19.6992
11731569_at	5074	PAWR	pro-apoptotic WT1 regulator	1.95585	9.31771	21.147	4.52203e-14	4.38e-12	22.4668
11724197_at	6781	STC1	stanniocalcin 1	1.94337	7.00267	17.4179	1.23228e-12	7.06742e-11	19.077
11745090_a_at	84898	PLXDC2	plexin domain containing 2	1.94205	9.93464	33.8431	1.26632e-17	5.60449e-15	30.66
11727554_s_at	5570	PKIB	cAMP-dependent protein kinase inhibitor beta	1.94188	4.79473	16.1063	4.59512e-12	2.13554e-10	17.7199
11725173_at	4330	MN1	MN1 proto-oncogene, transcriptional regulator	1.94038	7.78366	21.216	4.27608e-14	4.24142e-12	22.5239
11727947_at	1953	MEGF6	multiple EGF like domains 6	1.93965	9.7569	23.6748	6.45584e-15	9.20841e-13	24.4469
11729924_at	200424	TET3	tet methylcytosine dioxygenase 3	1.93791	7.63565	16.4319	3.28573e-12	1.62465e-10	18.066
11728787_a_at	5801	PTPRR	protein tyrosine phosphatase, receptor type R	1.93692	3.85082	18.5152	4.37913e-13	2.93692e-11	20.1413
11726614_at	1000	CDH2	cadherin 2	1.93552	11.5608	29.9433	1.08281e-16	3.41361e-14	28.5483
11725417_a_at	54947	LPCAT2	lysophosphatidylcholine acyltransferase 2	1.92871	8.49729	22.776	1.26018e-14	1.55108e-12	23.7682
11719827_a_at	25797	QPCT	glutaminyl-peptide cyclotransferase	1.92776	7.51644	21.6551	3.00666e-14	3.22808e-12	22.8832
11739501_a_at	1832	DSP	desmoplakin	1.92628	8.35623	21.7124	2.87314e-14	3.11173e-12	22.9295
11720448_at	6662	SOX9	SRY-box 9	1.9229	8.13896	19.5542	1.72834e-13	1.36548e-11	21.0953
11717196_a_at	4232	MEST	mesoderm specific transcript	1.92278	8.29899	22.066	2.17565e-14	2.43775e-12	23.2127
11724446_a_at	5144	PDE4D	phosphodiesterase 4D	1.92197	7.08331	17.7431	9.01479e-13	5.41489e-11	19.3988
11723143_at	259232	NALCN	sodium leak channel, non-selective	1.91116	7.72981	26.1072	1.18351e-15	2.21049e-13	26.1596
11756238_s_at	6513	SLC2A1	solute carrier family 2 member 1	1.90881	9.37601	28.9033	2.00874e-16	5.43294e-14	27.9344
11731650_a_at	50863	NTM	neurotrimin	1.90558	8.07151	22.2177	1.93343e-14	2.21517e-12	23.3329
11733044_at	6542	SLC7A2	solute carrier family 7 member 2	1.905	5.90589	9.09562	4.093e-08	5.76666e-07	8.2902
11743306_at	85462	FHDC1	FH2 domain containing 1	1.89857	5.10254	17.7068	9.33274e-13	5.56535e-11	19.3632
11717273_at	1289	COL5A1	collagen type V alpha 1 chain	1.89706	10.5338	22.4034	1.67499e-14	1.9461e-12	23.4789
11726041_x_at	9262	STK17B	serine/threonine kinase 17b	1.89597	8.25972	21.3188	3.93515e-14	4.01589e-12	22.6087
11729062_a_at	5154	PDGFA	platelet derived growth factor subunit A	1.89541	7.6019	25.2213	2.15621e-15	3.78445e-13	25.5556
11738053_x_at	5329	PLAUR	plasminogen activator, urokinase receptor	1.89534	9.12834	26.0434	1.23494e-15	2.28927e-13	26.1169
11757765_s_at	6444	SGCD	sarcoglycan delta	1.89512	9.46417	18.1269	6.27471e-13	3.97653e-11	19.7716
11727513_at	23508	TTC9	tetratricopeptide repeat domain 9	1.89327	5.63941	16.0454	4.89562e-12	2.26668e-10	17.6545
11733464_at	7498	XDH	xanthine dehydrogenase	1.893	5.13984	16.3689	3.50468e-12	1.71238e-10	17.9995
11732317_a_at	6444	SGCD	sarcoglycan delta	1.89182	8.97033	17.8504	8.14048e-13	4.9681e-11	19.5038
11728805_a_at	23705	CADM1	cell adhesion molecule 1	1.89095	8.89748	20.809	5.96285e-14	5.51647e-12	22.1844
11715743_x_at	55920	RCC2	regulator of chromosome condensation 2	1.88913	10.2455	27.4306	5.00325e-16	1.13594e-13	27.0234
11734723_at	10085	EDIL3	EGF like repeats and discoidin domains 3	1.88673	7.0895	12.5635	2.72904e-10	7.13922e-09	13.4916
11726572_a_at	8482	SEMA7A	semaphorin 7A (John Milton Hagen blood group)	1.88506	8.50184	11.9135	6.39183e-10	1.49765e-08	12.6084
11743667_at	1296	COL8A2	collagen type VIII alpha 2 chain	1.88426	7.37667	15.8077	6.28209e-12	2.81387e-10	17.3969
11720447_s_at	6662	SOX9	SRY-box 9	1.88305	6.71501	18.9338	2.99438e-13	2.15104e-11	20.5316
11737140_x_at	347273	CAVIN4	caveolae associated protein 4	1.88141	6.16883	17.9827	7.18384e-13	4.4725e-11	19.6324
11728232_a_at	9076	CLDN1	claudin 1	1.88081	6.84814	11.3821	1.3177e-09	2.83194e-08	11.8574
11718013_at	8660	IRS2	insulin receptor substrate 2	1.87974	8.7273	11.6757	8.80723e-10	1.98866e-08	12.2757
11725514_a_at	4092	SMAD7	SMAD family member 7	1.87862	8.67951	26.7363	7.82027e-16	1.60608e-13	26.5758
11731896_a_at	7292	TNFSF4	TNF superfamily member 4	1.87842	8.85047	21.4443	3.55753e-14	3.67599e-12	22.7116
11730424_at	164284	APCDD1L	APC down-regulated 1 like	1.87524	9.29255	19.4666	1.86603e-13	1.45907e-11	21.0168
11756961_a_at	10525	HYOU1	hypoxia up-regulated 1	1.87315	9.24021	19.272	2.21474e-13	1.67869e-11	20.8411
11731649_x_at	50863	NTM	neurotrimin	1.87272	8.74373	17.8826	7.89597e-13	4.83339e-11	19.5352
11716663_a_at	9518	GDF15	growth differentiation factor 15	1.87253	9.70994	22.0131	2.26742e-14	2.51628e-12	23.1707
11737316_a_at	83849	SYT15	synaptotagmin 15	1.87098	6.58814	14.0473	4.43962e-11	1.51858e-09	15.3741
11737316_a_at	102724488	LOC102724488	synaptotagmin-15	1.87098	6.58814	14.0473	4.43962e-11	1.51858e-09	15.3741
11721421_s_at	23108	RAP1GAP2	RAP1 GTPase activating protein 2	1.8658	6.22619	18.188	5.92675e-13	3.81337e-11	19.8303
11757982_s_at	55605	KIF21A	kinesin family member 21A	1.86243	8.0452	21.467	3.49336e-14	3.64776e-12	22.7302
11752572_a_at	6513	SLC2A1	solute carrier family 2 member 1	1.86206	7.99253	26.5703	8.71562e-16	1.76073e-13	26.467
11743839_a_at	10402	ST3GAL6	ST3 beta-galactoside alpha-2,3-sialyltransferase 6	1.86172	4.79804	13.3373	1.03674e-10	3.10134e-09	14.4953
11725545_a_at	4978	OPCML	opioid binding protein/cell adhesion molecule like	1.86151	6.14842	14.6227	2.29189e-11	8.47974e-10	16.0587
11719004_at	56172	ANKH	ANKH inorganic pyrophosphate transport regulator	1.86104	10.1225	24.2565	4.24079e-15	6.706e-13	24.8724
11726498_at	3976	LIF	LIF, interleukin 6 family cytokine	1.85864	7.66838	13.3191	1.05997e-10	3.15853e-09	14.4723
11724612_a_at	8445	DYRK2	dual specificity tyrosine phosphorylation regulated kinase 2	1.85275	9.03578	26.7754	7.62381e-16	1.58546e-13	26.6013
11724196_s_at	6781	STC1	stanniocalcin 1	1.84875	8.46324	12.2035	4.35255e-10	1.07823e-08	13.0072
11738453_at	345651	ACTBL2	actin, beta like 2	1.84862	4.02561	12.9899	1.59153e-10	4.51937e-09	14.0509
11736163_a_at	1030	CDKN2B	cyclin dependent kinase inhibitor 2B	1.84849	9.21677	15.8361	6.09686e-12	2.73833e-10	17.4278
11730740_a_at	8572	PDLIM4	PDZ and LIM domain 4	1.84632	7.09002	18.9463	2.96082e-13	2.13552e-11	20.5432
11717886_a_at	5328	PLAU	plasminogen activator, urokinase	1.84384	10.3429	19.7859	1.41341e-13	1.1544e-11	21.3015
11719828_x_at	25797	QPCT	glutaminyl-peptide cyclotransferase	1.84069	6.80236	16.7579	2.36261e-12	1.22833e-10	18.4063
11737583_s_at	6444	SGCD	sarcoglycan delta	1.83431	10.4209	28.3232	2.86212e-16	7.04779e-14	27.5815
11735383_s_at	753	LDLRAD4	low density lipoprotein receptor class A domain containing 4	1.83073	3.90465	11.3585	1.36154e-09	2.9135e-08	11.8234
11749671_a_at	4862	NPAS2	neuronal PAS domain protein 2	1.82473	5.57175	16.4773	3.13738e-12	1.56222e-10	18.1137
11715742_s_at	55920	RCC2	regulator of chromosome condensation 2	1.82379	11.0346	29.1014	1.78278e-16	4.90214e-14	28.0531
11723148_a_at	10560	SLC19A2	solute carrier family 19 member 2	1.82371	6.09797	15.3544	1.02018e-11	4.22191e-10	16.8959
11746991_a_at	481	ATP1B1	ATPase Na+/K+ transporting subunit beta 1	1.82262	7.82866	7.27834	9.72829e-07	9.29899e-06	5.0076
11724818_a_at	30011	SH3KBP1	SH3 domain containing kinase binding protein 1	1.82158	6.90279	20.5512	7.38349e-14	6.57277e-12	21.966
11753073_a_at	7292	TNFSF4	TNF superfamily member 4	1.81963	6.65722	15.5388	8.36314e-12	3.56983e-10	17.1013
11738065_a_at	57575	PCDH10	protocadherin 10	1.81826	7.13431	17.523	1.1133e-12	6.4523e-11	19.1816
11738844_a_at	50863	NTM	neurotrimin	1.81447	8.0996	15.9785	5.24978e-12	2.40368e-10	17.5823
11751294_a_at	81849	ST6GALNAC5	ST6 N-acetylgalactosaminide alpha-2,6-sialyltransferase 5	1.81425	6.13411	21.4456	3.55404e-14	3.67599e-12	22.7126
11723354_s_at	55636	CHD7	chromodomain helicase DNA binding protein 7	1.80757	5.72994	16.7365	2.41386e-12	1.25235e-10	18.3841
11748439_a_at	50863	NTM	neurotrimin	1.80232	8.33237	16.271	3.87513e-12	1.86213e-10	17.8958
11741679_x_at	5270	SERPINE2	serpin family E member 2	1.7943	10.558	7.98118	2.7158e-07	3.03679e-06	6.32808
11723687_a_at	55603	FAM46A	family with sequence similarity 46 member A	1.7908	9.02486	26.2663	1.0648e-15	2.06938e-13	26.2659
11755968_a_at	3084	NRG1	neuregulin 1	1.79044	4.9025	20.6643	6.72081e-14	6.11482e-12	22.0621
11736303_a_at	84981	MIR22HG	MIR22 host gene	1.7849	6.39718	21.2533	4.14873e-14	4.19921e-12	22.5548
11755975_x_at	5570	PKIB	cAMP-dependent protein kinase inhibitor beta	1.78215	5.14628	14.8478	1.78015e-11	6.85183e-10	16.3201
11755223_a_at	80853	KDM7A	lysine demethylase 7A	1.78067	7.09091	14.978	1.54049e-11	6.03692e-10	16.4697
11758216_s_at	6662	SOX9	SRY-box 9	1.77553	10.0062	28.1171	3.25106e-16	7.8878e-14	27.4543
11746705_a_at	6004	RGS16	regulator of G-protein signaling 16	1.77417	3.84084	15.4532	9.16947e-12	3.84939e-10	17.0062
11753962_a_at	6747	SSR3	signal sequence receptor subunit 3	1.77017	7.49014	5.71673	2.10178e-05	0.000138445	1.84212
11731432_at	57575	PCDH10	protocadherin 10	1.76997	8.61576	28.0231	3.4468e-16	8.28152e-14	27.396
11727128_at	7306	TYRP1	tyrosinase related protein 1	1.7636	4.72889	13.2067	1.21662e-10	3.56311e-09	14.3294
11716664_x_at	9518	GDF15	growth differentiation factor 15	1.75923	10.0742	22.1096	2.10288e-14	2.38174e-12	23.2474
11730029_a_at	144455	E2F7	E2F transcription factor 7	1.75888	9.71583	22.232	1.91206e-14	2.19872e-12	23.3442
11732316_a_at	6444	SGCD	sarcoglycan delta	1.75827	8.53687	22.4847	1.57359e-14	1.84999e-12	23.5424
11743197_at	7099	TLR4	toll like receptor 4	1.75702	5.8209	17.3706	1.29019e-12	7.37388e-11	19.0297
11758097_x_at	4148	MATN3	matrilin 3	1.75527	4.87286	13.4788	8.72888e-11	2.69685e-09	14.6736
11739255_x_at	157638	FAM84B	family with sequence similarity 84 member B	1.75339	6.38688	9.05446	4.37733e-08	6.11504e-07	8.22051
11731897_a_at	5744	PTHLH	parathyroid hormone like hormone	1.75048	6.86708	14.412	2.91202e-11	1.04898e-09	15.8108
11746168_a_at	357	SHROOM2	shroom family member 2	1.74883	4.17177	17.1138	1.65858e-12	9.08092e-11	18.771
11720351_a_at	2119	ETV5	ETS variant 5	1.74615	8.24717	18.3666	5.02129e-13	3.30052e-11	20.0007
11719198_s_at	894	CCND2	cyclin D2	1.74313	8.65032	24.7842	2.92023e-15	4.87556e-13	25.2495
11737582_a_at	6444	SGCD	sarcoglycan delta	1.74024	9.13859	13.5673	7.8447e-11	2.46523e-09	14.7843
11715683_a_at	3855	KRT7	keratin 7	1.73927	10.0557	20.487	7.79038e-14	6.88956e-12	21.9111
11743841_at	257068	PLCXD2	phosphatidylinositol specific phospholipase C X domain containing 2	1.73445	5.78337	19.9865	1.18963e-13	9.9967e-12	21.478
11727553_a_at	5570	PKIB	cAMP-dependent protein kinase inhibitor beta	1.73273	4.68783	11.5365	1.06504e-09	2.35331e-08	12.0784
11733698_s_at	6446	SGK1	serum/glucocorticoid regulated kinase 1	1.72803	11.3907	24.5636	3.41008e-15	5.58881e-13	25.0928
11720353_s_at	2119	ETV5	ETS variant 5	1.728	10.1788	21.6607	2.99344e-14	3.22088e-12	22.8876
11721134_at	9945	GFPT2	glutamine-fructose-6-phosphate transaminase 2	1.72443	8.60773	21.8741	2.5288e-14	2.77524e-12	23.0595
11720558_a_at	2669	GEM	GTP binding protein overexpressed in skeletal muscle	1.72432	8.95307	15.8053	6.29803e-12	2.81671e-10	17.3943
11731776_at	6356	CCL11	C-C motif chemokine ligand 11	1.72258	5.01351	12.9824	1.60654e-10	4.55417e-09	14.0411
11724613_a_at	8445	DYRK2	dual specificity tyrosine phosphorylation regulated kinase 2	1.71722	7.4797	12.7679	2.10356e-10	5.74589e-09	13.7616
11729063_a_at	5154	PDGFA	platelet derived growth factor subunit A	1.71583	7.37331	16.3024	3.75192e-12	1.81172e-10	17.9291
11719230_at	5097	PCDH1	protocadherin 1	1.71569	4.60732	13.4055	9.54068e-11	2.89703e-09	14.5814
11721133_at	9945	GFPT2	glutamine-fructose-6-phosphate transaminase 2	1.71268	7.61015	22.7005	1.33454e-14	1.61105e-12	23.7099
11743879_at	55534	MAML3	mastermind like transcriptional coactivator 3	1.71076	7.46727	17.3345	1.33632e-12	7.57629e-11	18.9936
11716556_a_at	7145	TNS1	tensin 1	1.70971	8.93348	23.8222	5.79865e-15	8.46619e-13	24.5557
11716048_at	10221	TRIB1	tribbles pseudokinase 1	1.70892	9.27337	21.2434	4.18225e-14	4.21414e-12	22.5466
11727817_at	84959	UBASH3B	ubiquitin associated and SH3 domain containing B	1.70614	7.67652	18.5758	4.14289e-13	2.80894e-11	20.1983
11715440_a_at	1490	CTGF	connective tissue growth factor	1.70433	12.1736	24.3042	4.09904e-15	6.54459e-13	24.9068
11715280_s_at	3872	KRT17	keratin 17	1.70423	6.41221	11.9452	6.12689e-10	1.44336e-08	12.6523
11749912_x_at	3486	IGFBP3	insulin like growth factor binding protein 3	1.70347	12.2989	20.0973	1.08224e-13	9.26736e-12	21.5748
11737750_s_at	6446	SGK1	serum/glucocorticoid regulated kinase 1	1.70253	11.6113	23.7449	6.13389e-15	8.83485e-13	24.4987
11741572_a_at	5999	RGS4	regulator of G-protein signaling 4	1.70202	7.80054	16.3909	3.42633e-12	1.68407e-10	18.0228
11725738_at	115123	MARCH3	membrane associated ring-CH-type finger 3	1.70161	6.73983	16.4506	3.2238e-12	1.59882e-10	18.0857
11751859_a_at	80380	PDCD1LG2	programmed cell death 1 ligand 2	1.70105	5.46354	15.6082	7.76448e-12	3.34467e-10	17.178
11757513_at	64332	NFKBIZ	NFKB inhibitor zeta	1.69764	10.0569	20.7323	6.35244e-14	5.801e-12	22.1197
11740404_a_at	55568	GALNT10	polypeptide N-acetylgalactosaminyltransferase 10	1.69698	8.67612	23.1551	9.4757e-15	1.24403e-12	24.0577
11740513_a_at	5144	PDE4D	phosphodiesterase 4D	1.69327	6.4893	15.5157	8.57368e-12	3.6394e-10	17.0756
11726040_at	9262	STK17B	serine/threonine kinase 17b	1.68863	6.215	16.8781	2.09491e-12	1.11253e-10	18.5303
11718012_at	8660	IRS2	insulin receptor substrate 2	1.6886	9.7225	20.602	7.07759e-14	6.33464e-12	22.0092
11743191_a_at	50863	NTM	neurotrimin	1.68372	10.5161	22.6489	1.38793e-14	1.66736e-12	23.67
11755106_a_at	27295	PDLIM3	PDZ and LIM domain 3	1.68203	6.6001	13.6519	7.08767e-11	2.26179e-09	14.8895
11754119_a_at	5328	PLAU	plasminogen activator, urokinase	1.68106	5.80896	17.1095	1.6657e-12	9.09977e-11	18.7666
11720064_a_at	152007	GLIPR2	GLI pathogenesis related 2	1.68099	9.8727	26.0233	1.25159e-15	2.31147e-13	26.1034
11718326_at	55841	WWC3	WWC family member 3	1.68027	8.75738	20.6071	7.0478e-14	6.3194e-12	22.0135
11716630_a_at	51129	ANGPTL4	angiopoietin like 4	1.68024	8.26404	9.08281	4.17937e-08	5.87163e-07	8.26853
11730614_a_at	6509	SLC1A4	solute carrier family 1 member 4	1.6785	7.8615	20.6223	6.95921e-14	6.26265e-12	22.0265
11759015_at	92521	SPECC1	sperm antigen with calponin homology and coiled-coil domains 1	1.67823	6.3209	18.2887	5.39698e-13	3.51941e-11	19.9265
11754696_x_at	55839	CENPN	centromere protein N	1.67776	8.36775	23.7435	6.14039e-15	8.83485e-13	24.4977
11717349_a_at	5947	RBP1	retinol binding protein 1	1.67628	8.31039	18.1538	6.11905e-13	3.9079e-11	19.7974
11724337_s_at	4897	NRCAM	neuronal cell adhesion molecule	1.67595	6.80276	16.7139	2.46922e-12	1.27706e-10	18.3608
11749730_a_at	5742	PTGS1	prostaglandin-endoperoxide synthase 1	1.67511	7.08815	18.6546	3.85502e-13	2.64271e-11	20.2722
11726508_a_at	1030	CDKN2B	cyclin dependent kinase inhibitor 2B	1.67425	10.0421	13.4213	9.35915e-11	2.85417e-09	14.6013
11758889_a_at	55603	FAM46A	family with sequence similarity 46 member A	1.67379	9.76277	27.1139	6.12564e-16	1.34154e-13	26.8207
11717125_at	9644	SH3PXD2A	SH3 and PX domains 2A	1.6732	12.786	26.8986	7.03813e-16	1.48235e-13	26.6815
11738845_x_at	50863	NTM	neurotrimin	1.67286	7.90313	14.6979	2.1056e-11	7.87731e-10	16.1464
11729664_s_at	23012	STK38L	serine/threonine kinase 38 like	1.67236	7.01477	17.0086	1.84017e-12	9.93233e-11	18.6639
11719164_a_at	1184	CLCN5	chloride voltage-gated channel 5	1.67138	6.28855	10.7465	3.24193e-09	6.24842e-08	10.9226
11719728_s_at	140885	SIRPA	signal regulatory protein alpha	1.6711	10.784	21.07	4.81446e-14	4.60912e-12	22.4029
11722412_s_at	6541	SLC7A1	solute carrier family 7 member 1	1.66915	7.9013	10.5043	4.61686e-09	8.54888e-08	10.5555
11721917_a_at	353322	ANKRD37	ankyrin repeat domain 37	1.66837	8.03125	23.8833	5.54706e-15	8.14693e-13	24.6006
11731648_a_at	50863	NTM	neurotrimin	1.66817	8.70319	16.6214	2.71052e-12	1.38164e-10	18.2646
11729419_a_at	489	ATP2A3	ATPase sarcoplasmic/endoplasmic reticulum Ca2+ transporting 3	1.66724	6.50784	14.0585	4.38208e-11	1.50306e-09	15.3876
11744072_at	25878	MXRA5	matrix remodeling associated 5	1.66696	6.82032	12.5189	2.88987e-10	7.53209e-09	13.4321
11763226_x_at	3576	CXCL8	C-X-C motif chemokine ligand 8	1.66582	6.77952	7.11728	1.31545e-06	1.21245e-05	4.69576
11743477_at	10165	SLC25A13	solute carrier family 25 member 13	1.66345	7.97889	19.1379	2.49473e-13	1.85401e-11	20.719
11734817_at	323	APBB2	amyloid beta precursor protein binding family B member 2	1.66325	6.95969	16.0666	4.78845e-12	2.22122e-10	17.6773
11715931_s_at	6446	SGK1	serum/glucocorticoid regulated kinase 1	1.66141	11.4614	20.772	6.14751e-14	5.64511e-12	22.1532
11741304_a_at	3084	NRG1	neuregulin 1	1.65766	5.90673	18.5577	4.21197e-13	2.85187e-11	20.1813
11727815_at	84959	UBASH3B	ubiquitin associated and SH3 domain containing B	1.6573	5.82039	19.8553	1.33132e-13	1.10006e-11	21.3627
11728417_at	55531	ELMOD1	ELMO domain containing 1	1.65657	4.95163	12.8108	1.99257e-10	5.47293e-09	13.8178
11728417_at	643923	LOC643923	uncharacterized LOC643923	1.65657	4.95163	12.8108	1.99257e-10	5.47293e-09	13.8178
11739857_at	57451	TENM2	teneurin transmembrane protein 2	1.65524	5.81235	8.87624	5.86854e-08	7.89947e-07	7.91634
11754134_a_at	27295	PDLIM3	PDZ and LIM domain 3	1.65088	6.4616	16.4061	3.37348e-12	1.66471e-10	18.0389
11728776_s_at	7421	VDR	vitamin D (1,25- dihydroxyvitamin D3) receptor	1.6502	9.60558	14.5814	2.40145e-11	8.81749e-10	16.0103
11725714_a_at	6208	RPS14	ribosomal protein S14	1.64925	9.07249	14.1673	3.86042e-11	1.34085e-09	15.5189
11725250_a_at	138639	PTPDC1	protein tyrosine phosphatase domain containing 1	1.64688	7.03921	23.1148	9.76581e-15	1.26866e-12	24.0271
11755648_a_at	9645	MICAL2	microtubule associated monooxygenase, calponin and LIM domain containing 2	1.64684	12.168	27.0224	6.49724e-16	1.39818e-13	26.7617
11745767_a_at	4313	MMP2	matrix metallopeptidase 2	1.64559	9.05349	15.7185	6.90448e-12	3.03497e-10	17.2993
11725716_a_at	55605	KIF21A	kinesin family member 21A	1.64523	6.34957	12.921	1.73482e-10	4.85661e-09	13.9615
11746689_a_at	55603	FAM46A	family with sequence similarity 46 member A	1.64451	8.91317	17.6592	9.76772e-13	5.78294e-11	19.3163
11746856_a_at	5054	SERPINE1	serpin family E member 1	1.63884	11.1549	20.9363	5.37008e-14	5.05308e-12	22.2913
11754442_x_at	2006	ELN	elastin	1.63875	10.3089	12.9577	1.65683e-10	4.66733e-09	14.0092
11732319_a_at	2825	GPR1	G protein-coupled receptor 1	1.63852	8.31923	20.9311	5.39321e-14	5.06522e-12	22.2869
11724132_at	2674	GFRA1	GDNF family receptor alpha 1	1.63617	5.99061	11.7813	7.63378e-10	1.75085e-08	12.4241
11763353_at	NA	NA	NA	1.63613	8.04027	21.9767	2.3329e-14	2.58316e-12	23.1417
11728047_a_at	117177	RAB3IP	RAB3A interacting protein	1.63497	6.68546	15.9643	5.32854e-12	2.43524e-10	17.567
11734967_a_at	387357	THEMIS	thymocyte selection associated	1.63278	3.37522	11.3117	1.45294e-09	3.08642e-08	11.756
11747349_s_at	29968	PSAT1	phosphoserine aminotransferase 1	1.6314	10.5116	18.6116	4.00928e-13	2.72956e-11	20.2319
11735571_a_at	8470	SORBS2	sorbin and SH3 domain containing 2	1.62953	3.85328	11.4714	1.16469e-09	2.54173e-08	11.9856
11748905_a_at	115908	CTHRC1	collagen triple helix repeat containing 1	1.62555	10.4327	18.6203	3.9775e-13	2.71165e-11	20.2401
11734822_at	323	APBB2	amyloid beta precursor protein binding family B member 2	1.62489	6.97169	13.1649	1.28102e-10	3.73185e-09	14.2759
11728413_at	5271	SERPINB8	serpin family B member 8	1.62416	7.53519	22.5309	1.51886e-14	1.79418e-12	23.5784
11759198_at	51209	RAB9B	RAB9B, member RAS oncogene family	1.62371	6.69825	21.1581	4.48145e-14	4.35997e-12	22.476
11726271_a_at	481	ATP1B1	ATPase Na+/K+ transporting subunit beta 1	1.61932	8.14796	11.4564	1.1891e-09	2.58588e-08	11.964
11755788_a_at	55605	KIF21A	kinesin family member 21A	1.61554	6.10379	11.3352	1.40627e-09	3.00015e-08	11.7899
11733967_at	7432	VIP	vasoactive intestinal peptide	1.61487	3.59588	14.5474	2.4959e-11	9.12368e-10	15.9704
11732995_a_at	5999	RGS4	regulator of G-protein signaling 4	1.60572	5.24804	13.9227	5.13842e-11	1.71033e-09	15.2227
11720063_a_at	152007	GLIPR2	GLI pathogenesis related 2	1.60071	8.981	16.9802	1.89272e-12	1.01687e-10	18.6349
11727814_at	84959	UBASH3B	ubiquitin associated and SH3 domain containing B	1.59625	8.0059	23.8942	5.50332e-15	8.10675e-13	24.6086
11723685_a_at	55603	FAM46A	family with sequence similarity 46 member A	1.59588	8.24473	17.7938	8.58992e-13	5.19753e-11	19.4485
11735788_a_at	3755	KCNG1	potassium voltage-gated channel modifier subfamily G member 1	1.59582	5.54802	13.3567	1.01247e-10	3.04449e-09	14.5198
11716385_at	7040	TGFB1	transforming growth factor beta 1	1.5887	7.81963	15.5572	8.20042e-12	3.51107e-10	17.1216
11724447_a_at	5144	PDE4D	phosphodiesterase 4D	1.58399	5.24742	12.4112	3.32063e-10	8.50256e-09	13.288
11728956_at	65249	ZSWIM4	zinc finger SWIM-type containing 4	1.58293	5.10457	12.1072	4.94105e-10	1.1994e-08	12.8756
11739971_at	9891	NUAK1	NUAK family kinase 1	1.58229	6.07681	11.8029	7.41416e-10	1.70601e-08	12.4544
11748624_a_at	10525	HYOU1	hypoxia up-regulated 1	1.58086	6.79354	14.2463	3.52326e-11	1.24116e-09	15.6135
11723686_s_at	55603	FAM46A	family with sequence similarity 46 member A	1.58043	9.99463	23.9725	5.20034e-15	7.75274e-13	24.666
11727274_a_at	357	SHROOM2	shroom family member 2	1.57908	4.74894	15.7202	6.89198e-12	3.03497e-10	17.3012
11725419_a_at	54947	LPCAT2	lysophosphatidylcholine acyltransferase 2	1.57818	8.76653	17.6879	9.50241e-13	5.65971e-11	19.3446
11723439_at	27286	SRPX2	sushi repeat containing protein, X-linked 2	1.57691	9.6419	23.5262	7.19876e-15	1.00367e-12	24.3365
11727597_at	11240	PADI2	peptidyl arginine deiminase 2	1.57639	5.94036	10.0188	9.55566e-09	1.6175e-07	9.80023
11758619_s_at	3976	LIF	LIF, interleukin 6 family cytokine	1.57546	9.67504	18.7831	3.43051e-13	2.40283e-11	20.3921
11745803_x_at	7168	TPM1	tropomyosin 1 (alpha)	1.57511	12.9399	24.44	3.72178e-15	6.0003e-13	25.0044
11730195_at	23541	SEC14L2	SEC14 like lipid binding 2	1.57401	5.13218	12.4147	3.30547e-10	8.46813e-09	13.2927
11741479_a_at	29968	PSAT1	phosphoserine aminotransferase 1	1.57212	10.1806	15.4161	9.54366e-12	3.99293e-10	16.9648
11715435_s_at	7078	TIMP3	TIMP metallopeptidase inhibitor 3	1.57163	12.8061	21.3015	3.99052e-14	4.05567e-12	22.5944
11755020_a_at	283537	SLC46A3	solute carrier family 46 member 3	1.57136	8.04685	19.8687	1.31614e-13	1.09116e-11	21.3745
11761349_x_at	7168	TPM1	tropomyosin 1 (alpha)	1.57082	12.6517	24.7816	2.92563e-15	4.87556e-13	25.2476
11722918_a_at	3790	KCNS3	potassium voltage-gated channel modifier subfamily S member 3	1.56831	6.24268	16.9338	1.98202e-12	1.0594e-10	18.5874
11744230_s_at	65997	RASL11B	RAS like family 11 member B	1.56785	5.98259	10.9509	2.41653e-09	4.80733e-08	11.2278
11756800_a_at	9620	CELSR1	cadherin EGF LAG seven-pass G-type receptor 1	1.56541	7.44003	11.5018	1.11702e-09	2.44957e-08	12.0289
11722758_at	4883	NPR3	natriuretic peptide receptor 3	1.56452	10.2523	24.5328	3.48499e-15	5.674e-13	25.0709
11728834_x_at	132720	C4orf32	chromosome 4 open reading frame 32	1.5625	7.20438	22.2906	1.82721e-14	2.11798e-12	23.3904
11730251_x_at	84708	LNX1	ligand of numb-protein X 1	1.56213	4.27335	12.3633	3.53312e-10	8.95401e-09	13.2236
11723028_a_at	4232	MEST	mesoderm specific transcript	1.56104	7.47256	17.0992	1.68273e-12	9.17363e-11	18.7561
11743201_a_at	3479	IGF1	insulin like growth factor 1	1.55924	7.3643	13.9817	4.79443e-11	1.62201e-09	15.2945
11740245_a_at	5744	PTHLH	parathyroid hormone like hormone	1.5584	5.77438	8.37864	1.35831e-07	1.65224e-06	7.04604
11759197_at	51209	RAB9B	RAB9B, member RAS oncogene family	1.55717	6.80774	12.7461	2.16238e-10	5.88383e-09	13.733
11725931_at	3309	HSPA5	heat shock protein family A (Hsp70) member 5	1.5553	8.02348	20.338	8.82778e-14	7.69245e-12	21.7833
11742309_x_at	7168	TPM1	tropomyosin 1 (alpha)	1.55502	10.3361	17.099	1.68293e-12	9.17363e-11	18.756
11728491_s_at	163782	KANK4	KN motif and ankyrin repeat domains 4	1.55414	6.36269	9.88474	1.17324e-08	1.93323e-07	9.58716
11726042_a_at	9262	STK17B	serine/threonine kinase 17b	1.55286	5.96796	19.0355	2.73332e-13	1.99242e-11	20.6253
11725082_a_at	794	CALB2	calbindin 2	1.55149	6.45175	13.0529	1.47156e-10	4.21985e-09	14.1322
11758911_at	8445	DYRK2	dual specificity tyrosine phosphorylation regulated kinase 2	1.54525	6.79874	20.8474	5.77679e-14	5.37448e-12	22.2168
11747917_a_at	22801	ITGA11	integrin subunit alpha 11	1.54396	6.16569	15.1733	1.24252e-11	5.02027e-10	16.692
11757507_s_at	1832	DSP	desmoplakin	1.54322	9.49798	24.1395	4.61141e-15	7.11034e-13	24.7876
11722413_a_at	6541	SLC7A1	solute carrier family 7 member 1	1.54165	9.83865	21.2411	4.19017e-14	4.21414e-12	22.5446
11743507_a_at	23092	ARHGAP26	Rho GTPase activating protein 26	1.54034	5.6281	15.1973	1.21033e-11	4.91668e-10	16.7192
11743856_a_at	115908	CTHRC1	collagen triple helix repeat containing 1	1.54029	11.7352	26.521	9.00185e-16	1.79656e-13	26.4346
11759907_at	9358	ITGBL1	integrin subunit beta like 1	1.54026	10.8206	17.7341	9.09256e-13	5.44179e-11	19.39
11756511_a_at	6578	SLCO2A1	solute carrier organic anion transporter family member 2A1	1.53926	5.57383	13.5087	8.41983e-11	2.62596e-09	14.711
11726218_a_at	639	PRDM1	PR/SET domain 1	1.53552	7.26482	20.3429	8.79138e-14	7.6878e-12	21.7875
11755100_a_at	1307	COL16A1	collagen type XVI alpha 1 chain	1.53314	9.95081	19.688	1.53845e-13	1.24015e-11	21.2146
11718527_at	9242	MSC	musculin	1.52911	6.54003	17.2382	1.46798e-12	8.16379e-11	18.8968
11757312_x_at	5054	SERPINE1	serpin family E member 1	1.52888	12.5904	23.4611	7.55231e-15	1.03834e-12	24.2879
11743895_a_at	55758	RCOR3	REST corepressor 3	1.52797	4.6987	9.44216	2.34372e-08	3.52591e-07	8.86882
11739734_a_at	80315	CPEB4	cytoplasmic polyadenylation element binding protein 4	1.52764	7.21434	14.9465	1.59518e-11	6.23153e-10	16.4336
11725934_x_at	3309	HSPA5	heat shock protein family A (Hsp70) member 5	1.52668	10.1425	11.1904	1.72158e-09	3.57872e-08	11.5798
11719162_a_at	84706	GPT2	glutamic--pyruvic transaminase 2	1.52275	9.2245	19.882	1.30107e-13	1.08048e-11	21.3863
11753943_x_at	9645	MICAL2	microtubule associated monooxygenase, calponin and LIM domain containing 2	1.5225	6.59554	23.5599	7.02257e-15	9.84652e-13	24.3616
11720352_at	2119	ETV5	ETS variant 5	1.52229	8.70286	13.488	8.63227e-11	2.67368e-09	14.6851
11722411_a_at	6541	SLC7A1	solute carrier family 7 member 1	1.52202	6.97129	14.8305	1.81495e-11	6.94749e-10	16.3001
11740326_x_at	8470	SORBS2	sorbin and SH3 domain containing 2	1.52188	4.47545	10.8041	2.9832e-09	5.7926e-08	11.009
11725932_a_at	3309	HSPA5	heat shock protein family A (Hsp70) member 5	1.51795	10.4851	12.9585	1.65517e-10	4.6653e-09	14.0102
11739506_a_at	164832	LONRF2	LON peptidase N-terminal domain and ring finger 2	1.51618	3.29445	14.7675	1.94745e-11	7.38048e-10	16.2272
11756056_a_at	6513	SLC2A1	solute carrier family 2 member 1	1.51312	7.67258	12.0935	5.03126e-10	1.21768e-08	12.8568
11718656_at	6566	SLC16A1	solute carrier family 16 member 1	1.51129	9.91862	21.0081	5.06385e-14	4.81066e-12	22.3513
11718201_at	23462	HEY1	hes related family bHLH transcription factor with YRPW motif 1	1.51065	5.52153	18.4249	4.75828e-13	3.14854e-11	20.056
11764124_s_at	NA	NA	NA	1.50735	6.08516	13.5468	8.04074e-11	2.52043e-09	14.7587
11751415_a_at	1831	TSC22D3	TSC22 domain family member 3	1.50646	8.91802	19.5908	1.67403e-13	1.33209e-11	21.1281
11727045_at	149111	CNIH3	cornichon family AMPA receptor auxiliary protein 3	1.50559	6.18524	12.8332	1.93703e-10	5.35233e-09	13.8471
11746180_a_at	1604	CD55	CD55 molecule (Cromer blood group)	1.50558	9.17374	19.7325	1.48023e-13	1.19712e-11	21.2541
11725764_a_at	1301	COL11A1	collagen type XI alpha 1 chain	1.50423	4.40705	6.93258	1.86736e-06	1.64604e-05	4.33388
11758360_s_at	22808	MRAS	muscle RAS oncogene homolog	1.50408	9.83901	16.4664	3.17242e-12	1.5765e-10	18.1023
11746683_a_at	4883	NPR3	natriuretic peptide receptor 3	1.50302	6.91579	12.276	3.95862e-10	9.91056e-09	13.1056
11718327_a_at	55841	WWC3	WWC family member 3	1.50209	8.9445	18.5186	4.36561e-13	2.93183e-11	20.1445
11746931_a_at	3624	INHBA	inhibin beta A subunit	1.50108	11.1923	17.0698	1.73211e-12	9.37976e-11	18.7263
11746395_x_at	4897	NRCAM	neuronal cell adhesion molecule	1.50013	3.64347	9.63352	1.73296e-08	2.70066e-07	9.18221
11722210_a_at	5742	PTGS1	prostaglandin-endoperoxide synthase 1	1.49996	6.76111	17.9446	7.44676e-13	4.60147e-11	19.5955
11727152_s_at	144165	PRICKLE1	prickle planar cell polarity protein 1	1.49982	9.81409	16.5927	2.79042e-12	1.41946e-10	18.2346
11735572_x_at	8470	SORBS2	sorbin and SH3 domain containing 2	1.49346	5.3661	15.1318	1.30036e-11	5.20721e-10	16.645
11728885_x_at	53346	TM6SF1	transmembrane 6 superfamily member 1	1.48845	7.95317	18.725	3.6161e-13	2.50291e-11	20.338
11756358_a_at	1263	PLK3	polo like kinase 3	1.48714	7.89573	17.7635	8.84137e-13	5.33663e-11	19.4188
11725933_at	3309	HSPA5	heat shock protein family A (Hsp70) member 5	1.48708	9.44918	11.1714	1.76819e-09	3.65719e-08	11.5521
11742287_a_at	79094	CHAC1	ChaC glutathione specific gamma-glutamylcyclotransferase 1	1.48691	6.35874	14.6493	2.22416e-11	8.26462e-10	16.0897
11741377_a_at	4313	MMP2	matrix metallopeptidase 2	1.48645	11.3523	24.9854	2.53807e-15	4.32213e-13	25.3911
11743250_a_at	4313	MMP2	matrix metallopeptidase 2	1.48635	10.6197	17.617	1.0171e-12	5.97879e-11	19.2746
11731090_s_at	57685	CACHD1	cache domain containing 1	1.48621	8.50357	13.0963	1.39435e-10	4.0288e-09	14.188
11743062_a_at	5329	PLAUR	plasminogen activator, urokinase receptor	1.48464	9.29527	21.3492	3.84016e-14	3.94334e-12	22.6336
11721919_x_at	23400	ATP13A2	ATPase 13A2	1.48312	8.48962	12.2594	4.04574e-10	1.0098e-08	13.0831
11744315_at	157285	PRAG1	PEAK1 related kinase activating pseudokinase 1	1.48287	8.35278	16.1738	4.2844e-12	2.02151e-10	17.7921
11744915_a_at	257194	NEGR1	neuronal growth regulator 1	1.48051	8.83396	13.0203	1.5324e-10	4.37657e-09	14.0901
11746020_a_at	80745	THUMPD2	THUMP domain containing 2	1.47843	8.2257	19.3174	2.12761e-13	1.6251e-11	20.8823
11743617_at	3673	ITGA2	integrin subunit alpha 2	1.47764	9.7648	16.3426	3.60035e-12	1.74877e-10	17.9717
11734819_s_at	323	APBB2	amyloid beta precursor protein binding family B member 2	1.47328	9.03787	18.6415	3.90159e-13	2.66725e-11	20.2599
11726272_a_at	481	ATP1B1	ATPase Na+/K+ transporting subunit beta 1	1.47314	10.9121	24.0899	4.77846e-15	7.31663e-13	24.7516
11742278_a_at	1491	CTH	cystathionine gamma-lyase	1.46376	7.4585	15.2508	1.14177e-11	4.66656e-10	16.7795
11758013_s_at	56892	C8orf4	chromosome 8 open reading frame 4	1.46349	5.52094	9.55413	1.9632e-08	3.01484e-07	9.05272
11748986_a_at	4092	SMAD7	SMAD family member 7	1.46301	5.47452	9.87471	1.19148e-08	1.95522e-07	9.57114
11759722_at	7518	XRCC4	X-ray repair cross complementing 4	1.45999	5.76944	12.4906	2.99717e-10	7.76268e-09	13.3943
11758481_s_at	117177	RAB3IP	RAB3A interacting protein	1.45942	5.00608	9.73499	1.4791e-08	2.35094e-07	9.34665
11716557_a_at	7145	TNS1	tensin 1	1.45751	7.46265	16.1603	4.34478e-12	2.03989e-10	17.7777
11737571_at	642658	SCX	scleraxis bHLH transcription factor	1.45729	7.62789	12.2763	3.9571e-10	9.91056e-09	13.106
11738414_a_at	7422	VEGFA	vascular endothelial growth factor A	1.45625	6.66214	12.641	2.4715e-10	6.60155e-09	13.5944
11730049_at	377677	CA13	carbonic anhydrase 13	1.45612	5.90756	12.119	4.86486e-10	1.18439e-08	12.8917
11747737_x_at	1264	CNN1	calponin 1	1.45228	9.47011	15.1867	1.22452e-11	4.95563e-10	16.7071
11721230_a_at	222389	BEND7	BEN domain containing 7	1.45125	7.54464	18.7844	3.42636e-13	2.40283e-11	20.3933
11727287_at	375444	C5orf34	chromosome 5 open reading frame 34	1.45068	6.88136	15.3819	9.90244e-12	4.11175e-10	16.9267
11750860_a_at	8418	CMAHP	cytidine monophospho-N-acetylneuraminic acid hydroxylase, pseudogene	1.44653	6.70379	9.60879	1.80148e-08	2.7925e-07	9.14195
11733042_at	6542	SLC7A2	solute carrier family 7 member 2	1.44431	4.30249	9.82632	1.28384e-08	2.08066e-07	9.49363
11719227_x_at	3783	KCNN4	potassium calcium-activated channel subfamily N member 4	1.44394	6.53477	19.0296	2.74781e-13	2.00004e-11	20.6198
11752487_a_at	83891	SNX25	sorting nexin 25	1.44333	7.69526	21.1201	4.62209e-14	4.44214e-12	22.4445
11757941_s_at	7058	THBS2	thrombospondin 2	1.44322	11.8401	14.6298	2.27353e-11	8.42278e-10	16.067
11732000_a_at	50940	PDE11A	phosphodiesterase 11A	1.4418	3.99673	14.6983	2.10471e-11	7.87731e-10	16.1468
11760999_a_at	64283	ARHGEF28	Rho guanine nucleotide exchange factor 28	1.44073	5.80302	14.3381	3.16957e-11	1.1288e-09	15.723
11759345_at	57381	RHOJ	ras homolog family member J	1.43902	8.11166	17.1124	1.66095e-12	9.08381e-11	18.7695
11727170_at	7227	TRPS1	transcriptional repressor GATA binding 1	1.43828	8.52901	17.1305	1.63166e-12	8.96326e-11	18.7878
11747134_a_at	7227	TRPS1	transcriptional repressor GATA binding 1	1.43821	6.2637	12.6811	2.34849e-10	6.31981e-09	13.6473
11725513_a_at	4092	SMAD7	SMAD family member 7	1.43733	4.81852	11.2135	1.66676e-09	3.48086e-08	11.6134
11732241_s_at	84189	SLITRK6	SLIT and NTRK like family member 6	1.4357	4.76233	6.71448	2.84114e-06	2.37805e-05	3.90075
11727816_at	84959	UBASH3B	ubiquitin associated and SH3 domain containing B	1.43442	9.30329	19.3447	2.077e-13	1.58889e-11	20.9069
11727164_at	92	ACVR2A	activin A receptor type 2A	1.43381	7.88452	18.4373	4.70438e-13	3.12123e-11	20.0677
11758550_x_at	203197	TMEM268	transmembrane protein 268	1.43355	6.46301	17.6207	1.01345e-12	5.97477e-11	19.2783
11734821_at	323	APBB2	amyloid beta precursor protein binding family B member 2	1.43332	9.58822	15.7557	6.63739e-12	2.94107e-10	17.3401
11748034_a_at	8418	CMAHP	cytidine monophospho-N-acetylneuraminic acid hydroxylase, pseudogene	1.43296	5.29729	11.7868	7.57727e-10	1.74031e-08	12.4318
11726754_at	203197	TMEM268	transmembrane protein 268	1.43141	5.16416	10.5461	4.3417e-09	8.09387e-08	10.6193
11749527_a_at	10631	POSTN	periostin	1.43102	7.2017	12.6057	2.5855e-10	6.84327e-09	13.5476
11751484_x_at	633	BGN	biglycan	1.42989	7.17287	10.1682	7.61914e-09	1.32462e-07	10.0354
11716728_s_at	7168	TPM1	tropomyosin 1 (alpha)	1.42944	13.1193	20.6672	6.70451e-14	6.11123e-12	22.0646
11724971_a_at	2321	FLT1	fms related tyrosine kinase 1	1.42878	4.10508	11.452	1.19621e-09	2.59677e-08	11.9578
11758982_at	81849	ST6GALNAC5	ST6 N-acetylgalactosaminide alpha-2,6-sialyltransferase 5	1.42877	6.08368	13.1457	1.31165e-10	3.80986e-09	14.2514
11719249_at	4084	MXD1	MAX dimerization protein 1	1.42815	7.97038	14.0374	4.49136e-11	1.53416e-09	15.3621
11744572_a_at	688	KLF5	Kruppel like factor 5	1.42738	4.3484	15.9895	5.18995e-12	2.3829e-10	17.5942
11721245_s_at	633	BGN	biglycan	1.42684	10.8422	12.9866	1.59814e-10	4.53295e-09	14.0466
11744168_at	1805	DPT	dermatopontin	1.42612	6.91041	14.9435	1.60054e-11	6.24753e-10	16.4302
11721566_s_at	9920	KBTBD11	kelch repeat and BTB domain containing 11	1.42539	4.94321	9.58506	1.8699e-08	2.88771e-07	9.10326
11728884_a_at	53346	TM6SF1	transmembrane 6 superfamily member 1	1.4246	7.83056	13.4858	8.65533e-11	2.67915e-09	14.6824
11744229_a_at	65997	RASL11B	RAS like family 11 member B	1.42435	5.41152	10.1781	7.50532e-09	1.30709e-07	10.051
11726311_at	2743	GLRB	glycine receptor beta	1.42107	6.17684	11.2442	1.59655e-09	3.35404e-08	11.6581
11718490_s_at	2171	FABP5	fatty acid binding protein 5	1.42078	7.5022	14.8085	1.86001e-11	7.09254e-10	16.2747
11719959_at	8879	SGPL1	sphingosine-1-phosphate lyase 1	1.42043	8.60365	24.0438	4.93977e-15	7.45408e-13	24.718
11752779_x_at	633	BGN	biglycan	1.42032	7.38451	10.3791	5.55618e-09	1.00628e-07	10.3632
11718631_at	29950	SERTAD1	SERTA domain containing 1	1.42002	8.83951	19.6897	1.53613e-13	1.24015e-11	21.2162
11727172_at	7227	TRPS1	transcriptional repressor GATA binding 1	1.41986	8.19676	11.7265	8.22101e-10	1.87299e-08	12.3472
11746113_a_at	23345	SYNE1	spectrin repeat containing nuclear envelope protein 1	1.41986	8.73309	19.1956	2.36983e-13	1.77451e-11	20.7717
11754026_a_at	3576	CXCL8	C-X-C motif chemokine ligand 8	1.4186	6.734	7.90238	3.12325e-07	3.43828e-06	6.18329
11715436_at	7078	TIMP3	TIMP metallopeptidase inhibitor 3	1.41847	11.6423	19.0651	2.66193e-13	1.95006e-11	20.6524
11724611_a_at	8445	DYRK2	dual specificity tyrosine phosphorylation regulated kinase 2	1.4166	8.44294	22.7362	1.2988e-14	1.57946e-12	23.7375
11732240_a_at	84189	SLITRK6	SLIT and NTRK like family member 6	1.4159	7.72873	13.0217	1.52974e-10	4.37149e-09	14.092
11747055_a_at	2674	GFRA1	GDNF family receptor alpha 1	1.41583	6.64522	12.238	4.16053e-10	1.03636e-08	13.054
11749240_a_at	65983	GRAMD3	GRAM domain containing 3	1.4143	6.00157	9.79611	1.34524e-08	2.1674e-07	9.44513
11721208_at	126917	IFFO2	intermediate filament family orphan 2	1.41354	6.72487	18.115	6.34512e-13	4.01088e-11	19.7601
11721705_at	1294	COL7A1	collagen type VII alpha 1 chain	1.41332	9.77418	17.4543	1.18963e-12	6.84661e-11	19.1133
11722209_a_at	5742	PTGS1	prostaglandin-endoperoxide synthase 1	1.41251	9.77591	16.2182	4.09218e-12	1.94752e-10	17.8395
11729619_at	1183	CLCN4	chloride voltage-gated channel 4	1.41168	4.87014	11.4421	1.2127e-09	2.62681e-08	11.9436
11754659_x_at	7163	TPD52	tumor protein D52	1.41137	3.82411	9.85011	1.23753e-08	2.01883e-07	9.53178
11743063_x_at	5329	PLAUR	plasminogen activator, urokinase receptor	1.40926	9.13633	21.126	4.59995e-14	4.42947e-12	22.4494
11752492_a_at	92	ACVR2A	activin A receptor type 2A	1.40913	6.09455	11.6269	9.41184e-10	2.10882e-08	12.2068
11757538_a_at	2805	GOT1	glutamic-oxaloacetic transaminase 1	1.40732	8.6121	17.2975	1.38541e-12	7.80992e-11	18.9564
11754357_a_at	2317	FLNB	filamin B	1.40385	9.99881	19.1359	2.49911e-13	1.85447e-11	20.7172
11733428_a_at	636	BICD1	BICD cargo adaptor 1	1.40133	7.64851	19.404	1.97149e-13	1.52467e-11	20.9604
11745103_x_at	50507	NOX4	NADPH oxidase 4	1.39726	7.08178	18.1046	6.4072e-13	4.04495e-11	19.7501
11729995_a_at	2662	GDF10	growth differentiation factor 10	1.39591	5.49255	11.1813	1.74383e-09	3.61284e-08	11.5665
11751004_x_at	23677	SH3BP4	SH3 domain binding protein 4	1.39487	5.91764	12.5765	2.68408e-10	7.04394e-09	13.5088
11721333_a_at	5352	PLOD2	procollagen-lysine,2-oxoglutarate 5-dioxygenase 2	1.39321	11.9411	18.0506	6.73963e-13	4.2225e-11	19.6981
11747999_a_at	51174	TUBD1	tubulin delta 1	1.39166	5.62621	12.945	1.68335e-10	4.72769e-09	13.9927
11721960_a_at	401548	SNX30	sorting nexin family member 30	1.39012	8.69788	16.3116	3.71688e-12	1.79655e-10	17.9388
11743828_s_at	753	LDLRAD4	low density lipoprotein receptor class A domain containing 4	1.3901	4.95131	13.0847	1.41465e-10	4.08031e-09	14.1731
11751903_s_at	1301	COL11A1	collagen type XI alpha 1 chain	1.38958	7.67138	14.2697	3.42933e-11	1.2098e-09	15.6415
11737041_a_at	90102	PHLDB2	pleckstrin homology like domain family B member 2	1.38861	8.89386	17.8951	7.80311e-13	4.78581e-11	19.5474
11748793_a_at	440	ASNS	asparagine synthetase (glutamine-hydrolyzing)	1.3865	11.451	19.044	2.71259e-13	1.98023e-11	20.6331
11724273_a_at	5796	PTPRK	protein tyrosine phosphatase, receptor type K	1.38548	7.73704	18.1318	6.24595e-13	3.96338e-11	19.7763
11740656_a_at	8091	HMGA2	high mobility group AT-hook 2	1.38466	7.86773	9.09353	4.10694e-08	5.78302e-07	8.28667
11718400_a_at	4860	PNP	purine nucleoside phosphorylase	1.38443	8.23143	14.1752	3.82544e-11	1.32963e-09	15.5283
11758967_s_at	7980	TFPI2	tissue factor pathway inhibitor 2	1.38237	5.92543	7.52247	6.19887e-07	6.27301e-06	5.4737
11739061_at	8140	SLC7A5	solute carrier family 7 member 5	1.38136	9.69171	16.7952	2.2759e-12	1.18824e-10	18.4448
11717721_s_at	6480	ST6GAL1	ST6 beta-galactoside alpha-2,6-sialyltransferase 1	1.38048	5.96811	11.5153	1.09642e-09	2.41011e-08	12.0483
11727973_a_at	55839	CENPN	centromere protein N	1.3804	6.09322	16.2414	3.99522e-12	1.91241e-10	17.8643
11746635_a_at	51176	LEF1	lymphoid enhancer binding factor 1	1.37666	3.92084	8.83002	6.33617e-08	8.44624e-07	7.83681
11758222_s_at	6574	SLC20A1	solute carrier family 20 member 1	1.376	11.3114	22.0133	2.26709e-14	2.51628e-12	23.1708
11740895_a_at	84981	MIR22HG	MIR22 host gene	1.37539	10.3401	19.9598	1.21708e-13	1.01756e-11	21.4546
11725180_a_at	860	RUNX2	runt related transcription factor 2	1.37229	7.90646	11.7208	8.28472e-10	1.88617e-08	12.3392
11750473_a_at	81029	WNT5B	Wnt family member 5B	1.37046	8.50869	19.2077	2.34456e-13	1.75911e-11	20.7827
11736570_a_at	23516	SLC39A14	solute carrier family 39 member 14	1.36888	10.9669	20.7517	6.2513e-14	5.72978e-12	22.1361
11748490_a_at	58499	ZNF462	zinc finger protein 462	1.36699	7.37985	14.5279	2.55167e-11	9.29324e-10	15.9475
11739767_a_at	5791	PTPRE	protein tyrosine phosphatase, receptor type E	1.36582	5.19325	12.4211	3.27827e-10	8.42023e-09	13.3013
11742308_s_at	7168	TPM1	tropomyosin 1 (alpha)	1.3653	9.42274	15.1292	1.30412e-11	5.21807e-10	16.642
11748073_a_at	753	LDLRAD4	low density lipoprotein receptor class A domain containing 4	1.36514	4.30941	12.3611	3.54332e-10	8.97527e-09	13.2206
11744248_a_at	57689	LRRC4C	leucine rich repeat containing 4C	1.36264	4.31421	14.8899	1.69876e-11	6.59453e-10	16.3685
11716558_at	7145	TNS1	tensin 1	1.36079	7.69462	11.6619	8.97435e-10	2.02178e-08	12.2562
11750355_a_at	100533483	DNAAF4-CCPG1	DNAAF4-CCPG1 readthrough (NMD candidate)	1.3586	8.53402	11.3672	1.3452e-09	2.88353e-08	11.836
11750355_a_at	9236	CCPG1	cell cycle progression 1	1.3586	8.53402	11.3672	1.3452e-09	2.88353e-08	11.836
11732699_a_at	5570	PKIB	cAMP-dependent protein kinase inhibitor beta	1.35826	3.37516	12.5936	2.62576e-10	6.93501e-09	13.5316
11718160_at	51621	KLF13	Kruppel like factor 13	1.35784	8.9979	20.3641	8.63595e-14	7.56525e-12	21.8057
11764081_at	254228	FAM26E	family with sequence similarity 26 member E	1.35755	5.04383	13.9769	4.82122e-11	1.62996e-09	15.2887
11743896_at	55758	RCOR3	REST corepressor 3	1.35753	7.52921	15.2054	1.19977e-11	4.87944e-10	16.7282
11761255_at	3755	KCNG1	potassium voltage-gated channel modifier subfamily G member 1	1.35524	4.52844	10.4964	4.67147e-09	8.62418e-08	10.5433
11728558_a_at	11077	HSF2BP	heat shock transcription factor 2 binding protein	1.35509	6.1016	14.8247	1.82667e-11	6.98696e-10	16.2934
11728558_a_at	105379490	LOC105379490	uncharacterized LOC105379490	1.35509	6.1016	14.8247	1.82667e-11	6.98696e-10	16.2934
11716551_s_at	3280	HES1	hes family bHLH transcription factor 1	1.35193	5.24716	11.043	2.1196e-09	4.28552e-08	11.3639
11759097_a_at	80139	ZNF703	zinc finger protein 703	1.35136	8.25303	15.8693	5.88717e-12	2.6562e-10	17.464
11739951_a_at	54438	GFOD1	glucose-fructose oxidoreductase domain containing 1	1.35041	7.11494	17.9351	7.51376e-13	4.6313e-11	19.5862
11726425_a_at	55800	SCN3B	sodium voltage-gated channel beta subunit 3	1.34927	4.44103	13.9596	4.92012e-11	1.65436e-09	15.2677
11759908_at	9358	ITGBL1	integrin subunit beta like 1	1.34797	10.2412	14.4268	2.86327e-11	1.03217e-09	15.8283
11764077_s_at	10085	EDIL3	EGF like repeats and discoidin domains 3	1.3477	10.9275	9.67531	1.6233e-08	2.54902e-07	9.25007
11742191_a_at	861	RUNX1	runt related transcription factor 1	1.3474	10.311	19.9524	1.22479e-13	1.02228e-11	21.4481
11742191_a_at	100506403	LOC100506403	uncharacterized LOC100506403	1.3474	10.311	19.9524	1.22479e-13	1.02228e-11	21.4481
11750279_a_at	6781	STC1	stanniocalcin 1	1.34717	6.92419	11.0375	2.13628e-09	4.31396e-08	11.3557
11730346_x_at	54517	PUS7	pseudouridylate synthase 7 (putative)	1.34685	8.2057	18.7457	3.5488e-13	2.4635e-11	20.3572
11718571_at	51559	NT5DC3	5'-nucleotidase domain containing 3	1.34527	8.6762	17.3018	1.37965e-12	7.78632e-11	18.9607
11724070_a_at	55274	PHF10	PHD finger protein 10	1.34514	8.17347	14.1245	4.05761e-11	1.40441e-09	15.4673
11759413_s_at	1009	CDH11	cadherin 11	1.34491	8.17771	15.8598	5.9466e-12	2.67814e-10	17.4536
11756096_a_at	291	SLC25A4	solute carrier family 25 member 4	1.34468	7.07442	14.7235	2.04604e-11	7.68934e-10	16.1761
11729341_at	5452	POU2F2	POU class 2 homeobox 2	1.34376	5.09301	9.88683	1.16947e-08	1.92913e-07	9.5905
11750861_x_at	8418	CMAHP	cytidine monophospho-N-acetylneuraminic acid hydroxylase, pseudogene	1.3434	6.31897	11.8057	7.38695e-10	1.70134e-08	12.4582
11756905_a_at	285761	DCBLD1	discoidin, CUB and LCCL domain containing 1	1.34152	6.93149	19.7489	1.45934e-13	1.1844e-11	21.2687
11721672_at	29107	NXT1	nuclear transport factor 2 like export factor 1	1.34036	8.74527	14.9558	1.57888e-11	6.18094e-10	16.4443
11732700_x_at	5570	PKIB	cAMP-dependent protein kinase inhibitor beta	1.33767	3.19377	12.9982	1.57524e-10	4.48084e-09	14.0616
11727413_at	2055	CLN8	CLN8, transmembrane ER and ERGIC protein	1.33701	5.83178	10.465	4.89248e-09	8.99196e-08	10.4953
11717829_s_at	1831	TSC22D3	TSC22 domain family member 3	1.33701	10.288	21.6244	3.08115e-14	3.29377e-12	22.8582
11747936_a_at	8291	DYSF	dysferlin	1.33368	7.01977	13.2769	1.1162e-10	3.30026e-09	14.4187
11758268_s_at	4232	MEST	mesoderm specific transcript	1.33332	7.3887	8.57216	9.76479e-08	1.23893e-06	7.38823
11721246_x_at	633	BGN	biglycan	1.33111	10.7201	13.9729	4.84397e-11	1.6343e-09	15.2838
11730731_s_at	4189	DNAJB9	DnaJ heat shock protein family (Hsp40) member B9	1.33094	8.22224	12.8797	1.82699e-10	5.08016e-09	13.9078
11731145_a_at	23345	SYNE1	spectrin repeat containing nuclear envelope protein 1	1.33065	9.84436	22.761	1.27462e-14	1.56007e-12	23.7566
11721244_a_at	633	BGN	biglycan	1.32688	6.11038	10.9024	2.59017e-09	5.12188e-08	11.1557
11723029_x_at	4232	MEST	mesoderm specific transcript	1.32635	6.85719	10.323	6.04011e-09	1.08239e-07	10.2765
11741204_a_at	138639	PTPDC1	protein tyrosine phosphatase domain containing 1	1.32536	5.28976	9.41894	2.43187e-08	3.64522e-07	8.8305
11753435_x_at	6520	SLC3A2	solute carrier family 3 member 2	1.32524	9.4637	15.8042	6.30552e-12	2.81671e-10	17.3931
11748944_a_at	55605	KIF21A	kinesin family member 21A	1.32485	5.06614	11.3071	1.4624e-09	3.09984e-08	11.7492
11717582_a_at	28984	RGCC	regulator of cell cycle	1.32408	7.94646	10.5965	4.03293e-09	7.58416e-08	10.6959
11758653_s_at	64123	ADGRL4	adhesion G protein-coupled receptor L4	1.32366	7.47872	13.4182	9.39498e-11	2.86157e-09	14.5974
11727005_at	64123	ADGRL4	adhesion G protein-coupled receptor L4	1.32328	9.1057	14.8441	1.78751e-11	6.86369e-10	16.3159
11723907_a_at	55132	LARP1B	La ribonucleoprotein domain family member 1B	1.32237	6.7612	16.8465	2.16212e-12	1.14256e-10	18.4977
11747348_a_at	29968	PSAT1	phosphoserine aminotransferase 1	1.32115	10.2743	12.9741	1.62327e-10	4.58844e-09	14.0304
11720431_s_at	1306	COL15A1	collagen type XV alpha 1 chain	1.32042	9.34472	12.6303	2.50559e-10	6.67101e-09	13.5802
11726653_a_at	9743	ARHGAP32	Rho GTPase activating protein 32	1.32022	5.87785	10.5971	4.02935e-09	7.58298e-08	10.6969
11722864_at	81831	NETO2	neuropilin and tolloid like 2	1.31983	6.24621	11.1577	1.80259e-09	3.71901e-08	11.5321
11715636_a_at	5054	SERPINE1	serpin family E member 1	1.3197	12.3209	17.1814	1.55195e-12	8.57297e-11	18.8395
11733904_at	51018	RRP15	ribosomal RNA processing 15 homolog	1.31827	7.15783	12.4836	3.02396e-10	7.82799e-09	13.3851
11744631_a_at	2321	FLT1	fms related tyrosine kinase 1	1.31725	2.81369	11.9045	6.46917e-10	1.51248e-08	12.5959
11734069_s_at	6747	SSR3	signal sequence receptor subunit 3	1.31625	9.40648	18.3925	4.90252e-13	3.23103e-11	20.0253
11760989_at	2744	GLS	glutaminase	1.31533	5.2557	11.203	1.69153e-09	3.52367e-08	11.5981
11758893_at	22877	MLXIP	MLX interacting protein	1.31503	10.5062	19.3991	1.98001e-13	1.52887e-11	20.956
11737982_a_at	64754	SMYD3	SET and MYND domain containing 3	1.31294	9.21916	13.4517	9.02052e-11	2.76795e-09	14.6395
11740109_a_at	55027	HEATR3	HEAT repeat containing 3	1.31282	5.85533	5.56861	2.86004e-05	0.000181182	1.52643
11725715_x_at	6208	RPS14	ribosomal protein S14	1.31271	9.21286	12.126	4.81998e-10	1.1752e-08	12.9013
11748128_a_at	81034	SLC25A32	solute carrier family 25 member 32	1.31135	7.83948	16.9877	1.87865e-12	1.01179e-10	18.6426
11731983_a_at	5744	PTHLH	parathyroid hormone like hormone	1.31042	7.6822	10.5244	4.48277e-09	8.32238e-08	10.5861
11748355_a_at	6566	SLC16A1	solute carrier family 16 member 1	1.30996	7.73369	9.22427	3.32226e-08	4.78149e-07	8.5067
11748180_a_at	5271	SERPINB8	serpin family B member 8	1.30994	7.86081	16.8296	2.1988e-12	1.15776e-10	18.4804
11736304_a_at	84981	MIR22HG	MIR22 host gene	1.30955	9.44749	17.7464	8.98654e-13	5.40448e-11	19.4021
11730250_a_at	84708	LNX1	ligand of numb-protein X 1	1.30955	3.98982	8.94903	5.20392e-08	7.11513e-07	8.04104
11731496_at	3624	INHBA	inhibin beta A subunit	1.30871	7.9922	10.833	2.86144e-09	5.59348e-08	11.0523
11740596_a_at	7042	TGFB2	transforming growth factor beta 2	1.30819	6.17542	18.8622	3.1939e-13	2.26154e-11	20.4654
11719006_at	56172	ANKH	ANKH inorganic pyrophosphate transport regulator	1.30786	6.13693	9.05193	4.39545e-08	6.13689e-07	8.21622
11748612_a_at	2119	ETV5	ETS variant 5	1.30587	6.58664	12.5814	2.66712e-10	7.01238e-09	13.5154
11716684_a_at	4642	MYO1D	myosin ID	1.30572	7.5323	17.8821	7.90022e-13	4.83339e-11	19.5347
11758482_s_at	9953	HS3ST3B1	heparan sulfate-glucosamine 3-sulfotransferase 3B1	1.30475	8.94235	16.7127	2.47222e-12	1.27727e-10	18.3595
11758482_s_at	9955	HS3ST3A1	heparan sulfate-glucosamine 3-sulfotransferase 3A1	1.30475	8.94235	16.7127	2.47222e-12	1.27727e-10	18.3595
11717101_a_at	81539	SLC38A1	solute carrier family 38 member 1	1.30438	6.18032	5.86881	1.53628e-05	0.000104982	2.16368
11721034_at	79660	PPP1R3B	protein phosphatase 1 regulatory subunit 3B	1.30375	7.92706	13.2197	1.19741e-10	3.511e-09	14.3459
11717693_at	1054	CEBPG	CCAAT/enhancer binding protein gamma	1.29942	9.42101	20.0908	1.08831e-13	9.27919e-12	21.5691
11746721_a_at	54210	TREM1	triggering receptor expressed on myeloid cells 1	1.29844	4.50147	11.1723	1.76591e-09	3.65401e-08	11.5534
11719005_a_at	56172	ANKH	ANKH inorganic pyrophosphate transport regulator	1.29835	7.16647	13.3412	1.03181e-10	3.09365e-09	14.5002
11743065_at	990	CDC6	cell division cycle 6	1.29488	6.6112	12.4435	3.18469e-10	8.20116e-09	13.3314
11719441_a_at	81029	WNT5B	Wnt family member 5B	1.2944	10.311	17.3826	1.2753e-12	7.2972e-11	19.0417
11755923_x_at	64283	ARHGEF28	Rho guanine nucleotide exchange factor 28	1.29338	6.72878	13.0304	1.51324e-10	4.32934e-09	14.1032
11755876_a_at	7866	IFRD2	interferon related developmental regulator 2	1.29327	7.96463	12.5959	2.61813e-10	6.91855e-09	13.5346
11750599_a_at	114880	OSBPL6	oxysterol binding protein like 6	1.29307	8.29639	19.4086	1.96345e-13	1.52083e-11	20.9646
11759412_at	1009	CDH11	cadherin 11	1.29199	6.99074	8.97514	4.98503e-08	6.85373e-07	8.08562
11724037_at	5743	PTGS2	prostaglandin-endoperoxide synthase 2	1.29071	7.41888	13.3138	1.06685e-10	3.17522e-09	14.4656
11744464_a_at	83891	SNX25	sorting nexin 25	1.28857	7.2023	12.434	3.22389e-10	8.29778e-09	13.3187
11723709_a_at	1407	CRY1	cryptochrome circadian clock 1	1.28691	8.60639	10.3588	5.72687e-09	1.03188e-07	10.3318
11733966_at	7432	VIP	vasoactive intestinal peptide	1.28607	3.09248	10.114	8.26865e-09	1.42499e-07	9.95043
11739468_at	84910	TMEM87B	transmembrane protein 87B	1.28558	8.38494	12.8291	1.9471e-10	5.37487e-09	13.8418
11719070_a_at	6782	HSPA13	heat shock protein family A (Hsp70) member 13	1.28347	9.4588	9.05246	4.39169e-08	6.13337e-07	8.21711
11715763_a_at	5420	PODXL	podocalyxin like	1.28158	5.92701	9.63441	1.73053e-08	2.69942e-07	9.18367
11723782_at	8540	AGPS	alkylglycerone phosphate synthase	1.2792	7.86293	18.957	2.93269e-13	2.12213e-11	20.553
11729176_at	56062	KLHL4	kelch like family member 4	1.27913	5.68809	7.0853	1.39726e-06	1.27667e-05	4.63342
11750173_x_at	8218	CLTCL1	clathrin heavy chain like 1	1.27665	7.20345	15.8798	5.82268e-12	2.63191e-10	17.4754
11754478_x_at	533	ATP6V0B	ATPase H+ transporting V0 subunit b	1.27649	9.93512	14.7294	2.03249e-11	7.65588e-10	16.183
11724779_at	283209	PGM2L1	phosphoglucomutase 2 like 1	1.27628	8.65447	16.2636	3.90501e-12	1.87285e-10	17.8879
11727151_a_at	144165	PRICKLE1	prickle planar cell polarity protein 1	1.27445	9.30092	12.6642	2.3996e-10	6.43033e-09	13.625
11761365_at	100131234	MIR181A1HG	MIR181A1 host gene	1.27244	5.62365	9.71783	1.51913e-08	2.4076e-07	9.31892
11720223_at	2673	GFPT1	glutamine--fructose-6-phosphate transaminase 1	1.27215	9.12696	22.9156	1.134e-14	1.43183e-12	23.8754
11724688_a_at	148398	SAMD11	sterile alpha motif domain containing 11	1.27134	8.15837	14.3978	2.95992e-11	1.06237e-09	15.7939
11724819_a_at	30011	SH3KBP1	SH3 domain containing kinase binding protein 1	1.26781	7.64541	14.3115	3.26815e-11	1.15925e-09	15.6913
11743366_a_at	5332	PLCB4	phospholipase C beta 4	1.26682	7.32221	10.154	7.78372e-09	1.34988e-07	10.0132
11757680_a_at	6509	SLC1A4	solute carrier family 1 member 4	1.26516	7.97189	13.6483	7.11814e-11	2.26773e-09	14.885
11759303_at	9258	MFHAS1	malignant fibrous histiocytoma amplified sequence 1	1.26484	7.44929	15.5898	7.91898e-12	3.40234e-10	17.1577
11722208_a_at	5742	PTGS1	prostaglandin-endoperoxide synthase 1	1.26407	9.12727	12.1481	4.68163e-10	1.14804e-08	12.9316
11716559_x_at	7145	TNS1	tensin 1	1.26347	8.18604	12.6775	2.35919e-10	6.33576e-09	13.6426
11742818_a_at	5329	PLAUR	plasminogen activator, urokinase receptor	1.26065	8.31046	18.3525	5.087e-13	3.33248e-11	19.9873
11734818_at	323	APBB2	amyloid beta precursor protein binding family B member 2	1.26045	9.41836	16.3739	3.48676e-12	1.70637e-10	18.0048
11736305_x_at	84981	MIR22HG	MIR22 host gene	1.25984	9.85955	17.0715	1.72935e-12	9.37505e-11	18.7279
11728830_a_at	117177	RAB3IP	RAB3A interacting protein	1.2596	4.61529	8.76546	7.05542e-08	9.273e-07	7.72528
11759746_a_at	64283	ARHGEF28	Rho guanine nucleotide exchange factor 28	1.25882	6.80613	14.8168	1.84289e-11	7.03989e-10	16.2843
11749895_a_at	586	BCAT1	branched chain amino acid transaminase 1	1.25793	7.96117	18.7236	3.62074e-13	2.50291e-11	20.3366
11715312_at	2303	FOXC2	forkhead box C2	1.25733	6.2138	8.17343	1.93755e-07	2.2518e-06	6.67791
11720315_x_at	533	ATP6V0B	ATPase H+ transporting V0 subunit b	1.2562	10.1296	17.2013	1.52205e-12	8.44548e-11	18.8595
11755766_x_at	401548	SNX30	sorting nexin family member 30	1.2553	8.85465	18.0435	6.78454e-13	4.24527e-11	19.6913
11757735_s_at	4189	DNAJB9	DnaJ heat shock protein family (Hsp40) member B9	1.25467	10.6581	18.8952	3.10023e-13	2.20785e-11	20.496
11726788_a_at	91614	DEPDC7	DEP domain containing 7	1.25447	6.26192	11.0148	2.20633e-09	4.44092e-08	11.3222
11728867_a_at	5106	PCK2	phosphoenolpyruvate carboxykinase 2, mitochondrial	1.25407	7.76761	13.962	4.90628e-11	1.65307e-09	15.2706
11744718_a_at	115908	CTHRC1	collagen triple helix repeat containing 1	1.2532	11.3007	13.7544	6.27137e-11	2.03162e-09	15.0163
11725041_at	2247	FGF2	fibroblast growth factor 2	1.25276	9.87601	17.5843	1.04948e-12	6.11105e-11	19.2424
11719089_a_at	5106	PCK2	phosphoenolpyruvate carboxykinase 2, mitochondrial	1.25101	9.73549	13.3366	1.03765e-10	3.10134e-09	14.4944
11715167_at	58504	ARHGAP22	Rho GTPase activating protein 22	1.25098	7.72149	15.1171	1.32147e-11	5.27044e-10	16.6283
11719223_a_at	8291	DYSF	dysferlin	1.25092	7.06236	11.6401	9.24436e-10	2.07977e-08	12.2254
11742991_a_at	29968	PSAT1	phosphoserine aminotransferase 1	1.24939	10.9173	15.1868	1.22438e-11	4.95563e-10	16.7072
11739733_a_at	80315	CPEB4	cytoplasmic polyadenylation element binding protein 4	1.24936	7.40982	16.269	3.8831e-12	1.86415e-10	17.8937
11751362_a_at	79783	SUGCT	succinyl-CoA:glutarate-CoA transferase	1.248	5.33518	10.645	3.75708e-09	7.13298e-08	10.7695
11744219_at	50486	G0S2	G0/G1 switch 2	1.24737	8.10631	13.7917	5.99952e-11	1.95617e-09	15.0622
11737922_a_at	5271	SERPINB8	serpin family B member 8	1.24669	7.04012	16.8549	2.14393e-12	1.13491e-10	18.5064
11721393_at	4815	NINJ2	ninjurin 2	1.2458	5.67436	10.2775	6.4655e-09	1.14822e-07	10.2059
11728402_a_at	23545	ATP6V0A2	ATPase H+ transporting V0 subunit a2	1.24549	7.65122	13.0083	1.55547e-10	4.43478e-09	14.0747
11723712_x_at	22877	MLXIP	MLX interacting protein	1.24417	10.3306	17.5583	1.07605e-12	6.25844e-11	19.2166
11748610_a_at	5352	PLOD2	procollagen-lysine,2-oxoglutarate 5-dioxygenase 2	1.24343	11.0654	8.26201	1.66103e-07	1.97436e-06	6.83749
11717184_a_at	54676	GTPBP2	GTP binding protein 2	1.24074	8.65344	13.6633	6.99151e-11	2.23688e-09	14.9036
11722160_a_at	2887	GRB10	growth factor receptor bound protein 10	1.24023	9.84231	17.8273	8.32114e-13	5.05343e-11	19.4812
11728605_s_at	96626	LIMS3	LIM zinc finger domain containing 3	1.23976	5.35997	8.33739	1.45821e-07	1.76077e-06	6.97247
11728605_s_at	3987	LIMS1	LIM zinc finger domain containing 1	1.23976	5.35997	8.33739	1.45821e-07	1.76077e-06	6.97247
11728605_s_at	100288695	LIMS4	LIM zinc finger domain containing 4	1.23976	5.35997	8.33739	1.45821e-07	1.76077e-06	6.97247
11761949_at	259232	NALCN	sodium leak channel, non-selective	1.23906	5.82451	9.08347	4.17488e-08	5.867e-07	8.26964
11724071_at	55274	PHF10	PHD finger protein 10	1.23842	8.39811	18.5129	4.38836e-13	2.93913e-11	20.1391
11728332_a_at	79047	KCTD15	potassium channel tetramerization domain containing 15	1.23759	6.57776	10.7351	3.29569e-09	6.33969e-08	10.9056
11752595_a_at	3313	HSPA9	heat shock protein family A (Hsp70) member 9	1.23647	9.50751	19.4381	1.91326e-13	1.49129e-11	20.9911
11758215_s_at	7090	TLE3	transducin like enhancer of split 3	1.23598	7.19956	11.0869	1.9919e-09	4.06051e-08	11.4284
11727171_at	7227	TRPS1	transcriptional repressor GATA binding 1	1.23597	7.33806	12.8467	1.90455e-10	5.27214e-09	13.8647
11762135_at	5796	PTPRK	protein tyrosine phosphatase, receptor type K	1.23439	4.68325	9.681	1.60893e-08	2.52957e-07	9.2593
11758139_s_at	6382	SDC1	syndecan 1	1.2337	9.88747	12.266	4.01055e-10	1.00203e-08	13.0921
11758491_s_at	8540	AGPS	alkylglycerone phosphate synthase	1.23312	7.52644	14.7287	2.0341e-11	7.65609e-10	16.1821
11752501_a_at	57007	ACKR3	atypical chemokine receptor 3	1.23301	5.33914	8.21208	1.81141e-07	2.12152e-06	6.74767
11715210_s_at	55228	PNMAL1	paraneoplastic Ma antigen family like 1	1.23242	5.52615	9.62945	1.74405e-08	2.71579e-07	9.17559
11715441_a_at	1490	CTGF	connective tissue growth factor	1.2322	12.7404	19.998	1.17798e-13	9.94948e-12	21.488
11743343_at	64795	RMND5A	required for meiotic nuclear division 5 homolog A	1.23109	6.87464	10.5991	4.01761e-09	7.56953e-08	10.6999
11730032_at	283078	MKX	mohawk homeobox	1.23073	5.6884	8.51201	1.08143e-07	1.35233e-06	7.28238
11753434_a_at	6520	SLC3A2	solute carrier family 3 member 2	1.2305	9.20462	15.1779	1.23634e-11	4.9994e-10	16.6972
11725367_at	389792	IER5L	immediate early response 5 like	1.22956	7.99639	15.1174	1.32111e-11	5.27044e-10	16.6286
11724431_at	79669	C3orf52	chromosome 3 open reading frame 52	1.22688	5.18947	10.019	9.55243e-09	1.6175e-07	9.80058
11743618_at	3673	ITGA2	integrin subunit alpha 2	1.22563	8.97175	8.28512	1.59591e-07	1.90612e-06	6.87895
11728783_a_at	54556	ING3	inhibitor of growth family member 3	1.2254	6.42258	12.4709	3.0739e-10	7.94893e-09	13.3681
11740544_a_at	3084	NRG1	neuregulin 1	1.22473	6.11849	12.9716	1.62841e-10	4.59774e-09	14.0271
11721191_at	9469	CHST3	carbohydrate sulfotransferase 3	1.22392	8.26339	12.7203	2.23432e-10	6.05296e-09	13.699
11738893_s_at	7168	TPM1	tropomyosin 1 (alpha)	1.22378	9.3554	14.931	1.62289e-11	6.32481e-10	16.4158
11722072_at	59274	MESDC1	mesoderm development candidate 1	1.22327	8.13058	17.7388	9.05237e-13	5.43087e-11	19.3946
11750659_a_at	9619	ABCG1	ATP binding cassette subfamily G member 1	1.22326	6.29312	11.2445	1.59593e-09	3.35404e-08	11.6585
11752820_a_at	55022	PID1	phosphotyrosine interaction domain containing 1	1.22272	8.2458	12.0338	5.44504e-10	1.30069e-08	12.7748
11730936_s_at	80709	AKNA	AT-hook transcription factor	1.22254	7.49607	15.023	1.46572e-11	5.78054e-10	16.5212
11724994_at	359845	RFLNB	refilin B	1.22123	7.88831	10.102	8.42055e-09	1.44814e-07	9.93153
11736447_at	7112	TMPO	thymopoietin	1.2209	6.84484	15.5952	7.8737e-12	3.38583e-10	17.1636
11721115_at	60559	SPCS3	signal peptidase complex subunit 3	1.22071	7.81159	11.6152	9.5629e-10	2.1359e-08	12.1902
11743688_at	2736	GLI2	GLI family zinc finger 2	1.22033	9.6014	20.865	5.69401e-14	5.30744e-12	22.2315
11747334_a_at	10212	DDX39A	DExD-box helicase 39A	1.21985	7.1384	10.6357	3.80825e-09	7.21904e-08	10.7555
11720985_at	79693	YRDC	yrdC N6-threonylcarbamoyltransferase domain containing	1.2196	8.40796	12.9135	1.7512e-10	4.88865e-09	13.9517
11718283_a_at	1978	EIF4EBP1	eukaryotic translation initiation factor 4E binding protein 1	1.21901	10.0598	15.8569	5.96434e-12	2.68368e-10	17.4505
11720943_a_at	6004	RGS16	regulator of G-protein signaling 16	1.21888	4.76443	12.4081	3.33408e-10	8.52819e-09	13.2838
11749439_a_at	55841	WWC3	WWC family member 3	1.2184	6.4024	12.0821	5.10774e-10	1.23261e-08	12.8412
11732736_at	337876	CHSY3	chondroitin sulfate synthase 3	1.21732	5.58129	10.1072	8.35426e-09	1.43874e-07	9.93974
11723863_a_at	55619	DOCK10	dedicator of cytokinesis 10	1.21544	8.44696	16.6318	2.68216e-12	1.37142e-10	18.2754
11749781_s_at	586	BCAT1	branched chain amino acid transaminase 1	1.21479	6.67685	12.8363	1.92953e-10	5.33532e-09	13.8512
11763585_s_at	7112	TMPO	thymopoietin	1.21441	7.14504	10.9544	2.40453e-09	4.7873e-08	11.2329
11723770_s_at	28966	SNX24	sorting nexin 24	1.21158	7.93989	17.4055	1.24722e-12	7.1448e-11	19.0646
11724285_at	55691	FRMD4A	FERM domain containing 4A	1.21055	8.82427	14.1813	3.79846e-11	1.32212e-09	15.5356
11752545_a_at	10611	PDLIM5	PDZ and LIM domain 5	1.20968	7.43954	14.5865	2.38758e-11	8.77308e-10	16.0163
11733230_a_at	5787	PTPRB	protein tyrosine phosphatase, receptor type B	1.20935	3.18158	11.8972	6.53283e-10	1.52592e-08	12.5858
11747162_a_at	2321	FLT1	fms related tyrosine kinase 1	1.209	4.73583	9.49317	2.1616e-08	3.27783e-07	8.95278
11744264_a_at	90701	SEC11C	SEC11 homolog C, signal peptidase complex subunit	1.20864	8.68992	16.0216	5.01879e-12	2.31505e-10	17.6288
11732844_a_at	57553	MICAL3	microtubule associated monooxygenase, calponin and LIM domain containing 3	1.20803	5.21764	12.4069	3.33927e-10	8.53703e-09	13.2822
11743202_x_at	3479	IGF1	insulin like growth factor 1	1.20515	7.28108	9.94157	1.07519e-08	1.79466e-07	9.67776
11749086_x_at	775	CACNA1C	calcium voltage-gated channel subunit alpha1 C	1.20472	7.39205	12.1443	4.70499e-10	1.15227e-08	12.9264
11716685_s_at	4642	MYO1D	myosin ID	1.20458	5.93937	8.03861	2.454e-07	2.77561e-06	6.43308
11757632_s_at	3985	LIMK2	LIM domain kinase 2	1.20358	7.8985	12.301	3.83145e-10	9.62138e-09	13.1395
11715350_a_at	1277	COL1A1	collagen type I alpha 1 chain	1.20326	12.0729	13.7941	5.98272e-11	1.95198e-09	15.0651
11727163_a_at	92	ACVR2A	activin A receptor type 2A	1.20256	7.7901	17.9787	7.21103e-13	4.48379e-11	19.6286
11716364_s_at	440	ASNS	asparagine synthetase (glutamine-hydrolyzing)	1.2024	11.1944	14.9234	1.63662e-11	6.36826e-10	16.4071
11740964_a_at	441024	MTHFD2L	methylenetetrahydrofolate dehydrogenase (NADP+ dependent) 2-like	1.20239	5.68205	11.4099	1.26789e-09	2.73678e-08	11.8974
11739375_at	9066	SYT7	synaptotagmin 7	1.20136	6.66915	12.0824	5.10574e-10	1.23261e-08	12.8416
11717117_a_at	57026	PDXP	pyridoxal phosphatase	1.19892	7.93644	14.1593	3.89668e-11	1.35155e-09	15.5092
11717117_a_at	23616	SH3BP1	SH3 domain binding protein 1	1.19892	7.93644	14.1593	3.89668e-11	1.35155e-09	15.5092
11715351_at	1277	COL1A1	collagen type I alpha 1 chain	1.19866	12.4737	14.1961	3.73365e-11	1.30385e-09	15.5535
11759005_a_at	80763	SPX	spexin hormone	1.19853	3.47461	6.83897	2.23416e-06	1.93018e-05	4.14875
11720986_at	79693	YRDC	yrdC N6-threonylcarbamoyltransferase domain containing	1.19834	9.14116	15.7561	6.63482e-12	2.94107e-10	17.3405
11735021_a_at	58499	ZNF462	zinc finger protein 462	1.1974	8.83184	15.9837	5.22131e-12	2.39286e-10	17.588
11734070_x_at	6747	SSR3	signal sequence receptor subunit 3	1.19704	10.4149	7.43734	7.24718e-07	7.19864e-06	5.31207
11747509_a_at	83641	FAM107B	family with sequence similarity 107 member B	1.19691	6.71692	13.8439	5.63935e-11	1.85338e-09	15.1263
11728761_a_at	861	RUNX1	runt related transcription factor 1	1.19673	10.4117	11.071	2.03718e-09	4.13326e-08	11.4051
11728761_a_at	100506403	LOC100506403	uncharacterized LOC100506403	1.19673	10.4117	11.071	2.03718e-09	4.13326e-08	11.4051
11748486_a_at	8540	AGPS	alkylglycerone phosphate synthase	1.19564	6.30866	11.1235	1.89149e-09	3.87658e-08	11.4821
11730796_x_at	5723	PSPH	phosphoserine phosphatase	1.19522	9.91373	9.69061	1.58496e-08	2.49753e-07	9.27489
11742208_a_at	1462	VCAN	versican	1.19438	10.4356	13.2941	1.09291e-10	3.24107e-09	14.4406
11741273_a_at	7881	KCNAB1	potassium voltage-gated channel subfamily A member regulatory beta subunit 1	1.19358	5.38561	9.58629	1.86628e-08	2.8839e-07	9.10527
11746207_a_at	114884	OSBPL10	oxysterol binding protein like 10	1.19156	6.31416	11.813	7.31441e-10	1.68698e-08	12.4685
11724993_at	359845	RFLNB	refilin B	1.19129	10.4638	19.6025	1.65716e-13	1.32292e-11	21.1384
11750250_a_at	10848	PPP1R13L	protein phosphatase 1 regulatory subunit 13 like	1.19122	7.32131	14.0007	4.68874e-11	1.58843e-09	15.3175
11751483_s_at	633	BGN	biglycan	1.19054	7.37042	10.8509	2.78857e-09	5.45751e-08	11.0791
11746733_x_at	65983	GRAMD3	GRAM domain containing 3	1.1891	6.77618	13.7719	6.14221e-11	1.99612e-09	15.0378
11720062_s_at	8870	IER3	immediate early response 3	1.18845	11.3079	16.1586	4.35221e-12	2.03989e-10	17.7759
11749526_a_at	23012	STK38L	serine/threonine kinase 38 like	1.18746	6.65218	13.7025	6.67167e-11	2.14425e-09	14.9521
11734214_a_at	143098	MPP7	membrane palmitoylated protein 7	1.18668	3.92952	11.6598	8.99946e-10	2.02652e-08	12.2533
11724038_a_at	5743	PTGS2	prostaglandin-endoperoxide synthase 2	1.1862	6.33247	8.40671	1.29445e-07	1.58116e-06	7.09596
11727263_a_at	57089	ENTPD7	ectonucleoside triphosphate diphosphohydrolase 7	1.18549	5.81317	11.1383	1.85244e-09	3.81392e-08	11.5038
11727150_a_at	144165	PRICKLE1	prickle planar cell polarity protein 1	1.18515	8.27416	15.1698	1.24727e-11	5.03126e-10	16.6881
11757835_s_at	80315	CPEB4	cytoplasmic polyadenylation element binding protein 4	1.18493	7.55663	12.9786	1.61432e-10	4.56577e-09	14.0361
11739043_a_at	3985	LIMK2	LIM domain kinase 2	1.18357	7.11113	13.4099	9.49025e-11	2.88526e-09	14.5869
11718284_x_at	1978	EIF4EBP1	eukaryotic translation initiation factor 4E binding protein 1	1.18351	11.009	15.5243	8.49475e-12	3.6121e-10	17.0852
11730155_a_at	6444	SGCD	sarcoglycan delta	1.18342	8.5664	12.0165	5.57195e-10	1.32461e-08	12.7509
11748186_a_at	6509	SLC1A4	solute carrier family 1 member 4	1.18315	6.29025	13.1787	1.25931e-10	3.6816e-09	14.2937
11720313_a_at	533	ATP6V0B	ATPase H+ transporting V0 subunit b	1.18293	10.3115	13.8774	5.42066e-11	1.79342e-09	15.1673
200078_PM_s_at	533	ATP6V0B	ATPase H+ transporting V0 subunit b	1.18191	10.224	15.6885	7.12831e-12	3.1195e-10	17.2664
11734823_a_at	323	APBB2	amyloid beta precursor protein binding family B member 2	1.17929	8.41781	18.9717	2.89422e-13	2.09736e-11	20.5666
11724776_at	283209	PGM2L1	phosphoglucomutase 2 like 1	1.17624	8.16611	13.5818	7.70908e-11	2.43187e-09	14.8024
11730756_at	51060	TXNDC12	thioredoxin domain containing 12	1.17599	9.66676	17.5996	1.03422e-12	6.05066e-11	19.2575
11732735_s_at	337876	CHSY3	chondroitin sulfate synthase 3	1.1748	4.23977	13.4302	9.25886e-11	2.82881e-09	14.6125
11743367_a_at	5332	PLCB4	phospholipase C beta 4	1.1735	8.81227	11.8877	6.61633e-10	1.54197e-08	12.5726
11737043_x_at	90102	PHLDB2	pleckstrin homology like domain family B member 2	1.17203	8.70841	9.206	3.42178e-08	4.91471e-07	8.47607
11751797_a_at	3589	IL11	interleukin 11	1.17181	7.63922	12.4321	3.23202e-10	8.31439e-09	13.3161
11725688_x_at	85415	RHPN2	rhophilin Rho GTPase binding protein 2	1.17085	6.66018	10.5505	4.31402e-09	8.05441e-08	10.626
11740194_a_at	533	ATP6V0B	ATPase H+ transporting V0 subunit b	1.16914	9.98228	17.8616	8.05459e-13	4.92175e-11	19.5147
11718276_x_at	7866	IFRD2	interferon related developmental regulator 2	1.16877	8.47106	12.0774	5.13944e-10	1.23844e-08	12.8347
11724709_s_at	6664	SOX11	SRY-box 11	1.16876	4.5724	11.5761	1.00878e-09	2.241e-08	12.1348
11727523_x_at	10308	ZNF267	zinc finger protein 267	1.16871	6.54258	12.508	2.93045e-10	7.6178e-09	13.4177
11717116_at	64781	CERK	ceramide kinase	1.16727	9.42638	12.6808	2.34942e-10	6.31981e-09	13.6469
11735275_at	8809	IL18R1	interleukin 18 receptor 1	1.16716	4.95405	8.22718	1.76449e-07	2.07492e-06	6.77487
11726252_a_at	6507	SLC1A3	solute carrier family 1 member 3	1.1669	3.84685	10.5681	4.20385e-09	7.86355e-08	10.6528
11754183_s_at	3149	HMGB3	high mobility group box 3	1.16642	6.85052	13.5913	7.62156e-11	2.40733e-09	14.8142
11726289_at	65983	GRAMD3	GRAM domain containing 3	1.16618	8.15188	15.5265	8.47428e-12	3.60649e-10	17.0876
11725058_a_at	4739	NEDD9	neural precursor cell expressed, developmentally down-regulated 9	1.16613	7.02348	13.6551	7.06024e-11	2.25595e-09	14.8935
11728512_a_at	7188	TRAF5	TNF receptor associated factor 5	1.16599	8.58382	12.0464	5.35508e-10	1.28229e-08	12.7921
11751666_a_at	7286	TUFT1	tuftelin 1	1.16551	6.16118	9.63788	1.72116e-08	2.68564e-07	9.18931
11722041_s_at	55852	TEX2	testis expressed 2	1.16505	9.19451	12.2298	4.20541e-10	1.04499e-08	13.0429
11737934_a_at	9853	RUSC2	RUN and SH3 domain containing 2	1.16474	7.05844	13.6538	7.07122e-11	2.258e-09	14.8919
11743345_a_at	24140	FTSJ1	FtsJ RNA methyltransferase homolog 1 (E. coli)	1.16469	9.68222	17.0783	1.7177e-12	9.32212e-11	18.7349
11753988_a_at	10253	SPRY2	sprouty RTK signaling antagonist 2	1.16454	7.91575	9.66163	1.65835e-08	2.59665e-07	9.2279
11743969_s_at	87	ACTN1	actinin alpha 1	1.16444	11.0888	15.8834	5.80039e-12	2.62423e-10	17.4793
11725822_a_at	56704	JPH1	junctophilin 1	1.16398	3.9448	11.073	2.0315e-09	4.12593e-08	11.408
11731919_a_at	7112	TMPO	thymopoietin	1.16313	3.80786	3.64651	0.001871	0.00711636	-2.7021
11725056_a_at	4739	NEDD9	neural precursor cell expressed, developmentally down-regulated 9	1.16285	6.73079	11.9978	5.71173e-10	1.35523e-08	12.7252
11745256_s_at	80315	CPEB4	cytoplasmic polyadenylation element binding protein 4	1.16251	8.23308	8.7541	7.19052e-08	9.43405e-07	7.70561
11727583_a_at	2042	EPHA3	EPH receptor A3	1.16246	2.84672	6.54045	3.98966e-06	3.21924e-05	3.55068
11724727_a_at	1983	EIF5	eukaryotic translation initiation factor 5	1.16145	5.67154	11.1872	1.7293e-09	3.59025e-08	11.5752
11725070_a_at	79960	JADE1	jade family PHD finger 1	1.16062	7.8489	15.9023	5.68656e-12	2.5798e-10	17.4998
11746872_a_at	1277	COL1A1	collagen type I alpha 1 chain	1.16038	10.8025	11.9767	5.87476e-10	1.38859e-08	12.696
11717703_a_at	3801	KIFC3	kinesin family member C3	1.16027	8.88097	14.6388	2.25062e-11	8.35041e-10	16.0775
11751117_x_at	87	ACTN1	actinin alpha 1	1.15959	8.53319	9.95568	1.0522e-08	1.7606e-07	9.70021
11735234_a_at	92745	SLC38A5	solute carrier family 38 member 5	1.1593	7.05563	10.0484	9.13435e-09	1.55737e-07	9.84705
11719019_at	865	CBFB	core-binding factor beta subunit	1.15928	9.79517	15.7315	6.80981e-12	3.00402e-10	17.3136
11752032_a_at	9644	SH3PXD2A	SH3 and PX domains 2A	1.15866	8.47623	14.6015	2.34739e-11	8.64465e-10	16.0339
11761642_a_at	7168	TPM1	tropomyosin 1 (alpha)	1.15766	5.26058	12.8204	1.96858e-10	5.41938e-09	13.8304
11751013_a_at	2743	GLRB	glycine receptor beta	1.15667	8.04289	12.5812	2.66781e-10	7.01238e-09	13.5151
11760568_a_at	255324	EPGN	epithelial mitogen	1.15504	3.97478	6.99853	1.6469e-06	1.47562e-05	4.46362
11757119_at	574040	SNORA6	small nucleolar RNA, H/ACA box 6	1.15458	4.19221	4.11482	0.000662412	0.00286516	-1.66488
11757119_at	3921	RPSA	ribosomal protein SA	1.15458	4.19221	4.11482	0.000662412	0.00286516	-1.66488
11720132_a_at	56907	SPIRE1	spire type actin nucleation factor 1	1.15458	8.20665	15.7151	6.92978e-12	3.04338e-10	17.2956
11748140_s_at	262	AMD1	adenosylmethionine decarboxylase 1	1.15413	7.87009	12.3477	3.6057e-10	9.10531e-09	13.2025
11717275_s_at	1289	COL5A1	collagen type V alpha 1 chain	1.15229	12.0319	14.5464	2.4986e-11	9.12682e-10	15.9693
11722957_a_at	57154	SMURF1	SMAD specific E3 ubiquitin protein ligase 1	1.1506	8.37659	17.4878	1.15181e-12	6.65211e-11	19.1466
11741799_a_at	54880	BCOR	BCL6 corepressor	1.14994	7.5256	14.4791	2.69739e-11	9.76646e-10	15.89
11733383_a_at	60312	AFAP1	actin filament associated protein 1	1.14964	10.3318	16.2001	4.16907e-12	1.98031e-10	17.8203
11757254_at	56286	DAD1P1	defender against cell death 1 pseudogene 1	1.149	5.17768	5.94727	1.3084e-05	9.1146e-05	2.32855
11763248_x_at	1978	EIF4EBP1	eukaryotic translation initiation factor 4E binding protein 1	1.14863	10.1502	11.2125	1.66912e-09	3.48432e-08	11.612
11722407_a_at	79094	CHAC1	ChaC glutathione specific gamma-glutamylcyclotransferase 1	1.14627	9.20102	6.27082	6.80573e-06	5.12085e-05	3.00061
11758768_x_at	262	AMD1	adenosylmethionine decarboxylase 1	1.14619	6.6893	11.8297	7.15211e-10	1.6534e-08	12.4918
11718178_a_at	146223	CMTM4	CKLF like MARVEL transmembrane domain containing 4	1.14557	7.57719	15.6803	7.1902e-12	3.14381e-10	17.2574
11729156_a_at	81034	SLC25A32	solute carrier family 25 member 32	1.14469	9.32802	14.5798	2.406e-11	8.82766e-10	16.0084
11719388_x_at	7975	MAFK	MAF bZIP transcription factor K	1.14413	8.69008	12.0596	5.26239e-10	1.26254e-08	12.8102
11740896_s_at	84981	MIR22HG	MIR22 host gene	1.1433	10.6868	13.8064	5.89573e-11	1.92613e-09	15.0802
11737326_a_at	6536	SLC6A9	solute carrier family 6 member 9	1.14081	9.1858	10.2311	6.93092e-09	1.2195e-07	10.1337
11734742_a_at	3985	LIMK2	LIM domain kinase 2	1.14006	7.78686	13.5659	7.85809e-11	2.46787e-09	14.7825
11716639_a_at	1282	COL4A1	collagen type IV alpha 1 chain	1.14001	11.5265	14.8057	1.86588e-11	7.10945e-10	16.2715
11746732_a_at	65983	GRAMD3	GRAM domain containing 3	1.13929	6.53357	9.48114	2.20316e-08	3.33167e-07	8.93301
11718841_s_at	3576	CXCL8	C-X-C motif chemokine ligand 8	1.13903	8.46176	8.11777	2.13547e-07	2.44778e-06	6.57713
11746592_s_at	283970	PDXDC2P-NPIPB14P	nuclear pore complex-interacting protein	1.13846	4.12901	8.2877	1.58878e-07	1.89806e-06	6.88359
11746592_s_at	9284	NPIPA1	nuclear pore complex interacting protein family member A1	1.13846	4.12901	8.2877	1.58878e-07	1.89806e-06	6.88359
11746592_s_at	23117	NPIPB3	nuclear pore complex interacting protein family member B3	1.13846	4.12901	8.2877	1.58878e-07	1.89806e-06	6.88359
11746592_s_at	339044	PKD1P1	polycystin 1, transient receptor potential channel interacting pseudogene 1	1.13846	4.12901	8.2877	1.58878e-07	1.89806e-06	6.88359
11746592_s_at	440345	NPIPB4	nuclear pore complex interacting protein family member B4	1.13846	4.12901	8.2877	1.58878e-07	1.89806e-06	6.88359
11746592_s_at	642778	NPIPA3	nuclear pore complex interacting protein family member A3	1.13846	4.12901	8.2877	1.58878e-07	1.89806e-06	6.88359
11746592_s_at	642799	NPIPA2	nuclear pore complex interacting protein family member A2	1.13846	4.12901	8.2877	1.58878e-07	1.89806e-06	6.88359
11746592_s_at	728888	NPIPB11	nuclear pore complex interacting protein family member B11	1.13846	4.12901	8.2877	1.58878e-07	1.89806e-06	6.88359
11746592_s_at	100132247	NPIPB5	nuclear pore complex interacting protein family member B5	1.13846	4.12901	8.2877	1.58878e-07	1.89806e-06	6.88359
11746592_s_at	100288332	NPIPA5	nuclear pore complex interacting protein family member A5	1.13846	4.12901	8.2877	1.58878e-07	1.89806e-06	6.88359
11746592_s_at	101059938	NPIPA7	nuclear pore complex interacting protein family member A7	1.13846	4.12901	8.2877	1.58878e-07	1.89806e-06	6.88359
11746592_s_at	101059953	NPIPA8	nuclear pore complex interacting protein family member A8	1.13846	4.12901	8.2877	1.58878e-07	1.89806e-06	6.88359
11746592_s_at	102724993	LOC102724993	nuclear pore complex-interacting protein family member A7-like	1.13846	4.12901	8.2877	1.58878e-07	1.89806e-06	6.88359
11746592_s_at	105376752	LOC105376752	nuclear pore complex-interacting protein family member A5	1.13846	4.12901	8.2877	1.58878e-07	1.89806e-06	6.88359
11742993_x_at	29968	PSAT1	phosphoserine aminotransferase 1	1.1382	10.9331	12.7063	2.27455e-10	6.14513e-09	13.6805
11749113_a_at	1739	DLG1	discs large MAGUK scaffold protein 1	1.13723	6.00009	11.5618	1.02878e-09	2.28032e-08	12.1144
11725418_a_at	54947	LPCAT2	lysophosphatidylcholine acyltransferase 2	1.13655	6.47442	10.702	3.45821e-09	6.61376e-08	10.8556
11724243_at	6925	TCF4	transcription factor 4	1.13545	8.69828	7.89197	3.18169e-07	3.4902e-06	6.16409
11724777_at	283209	PGM2L1	phosphoglucomutase 2 like 1	1.13509	7.74954	18.5936	4.07576e-13	2.77101e-11	20.215
11725370_s_at	7422	VEGFA	vascular endothelial growth factor A	1.13503	8.545	11.0621	2.06304e-09	4.178e-08	11.392
11741965_x_at	7422	VEGFA	vascular endothelial growth factor A	1.13495	6.95989	14.2495	3.5101e-11	1.23741e-09	15.6174
11756412_a_at	64943	NT5DC2	5'-nucleotidase domain containing 2	1.13331	8.15454	9.76078	1.421e-08	2.27318e-07	9.38825
11746934_a_at	56907	SPIRE1	spire type actin nucleation factor 1	1.13317	7.78035	13.152	1.30152e-10	3.78711e-09	14.2595
11750172_a_at	8218	CLTCL1	clathrin heavy chain like 1	1.13298	7.06295	12.9652	1.64156e-10	4.6322e-09	14.0188
11716015_a_at	123920	CMTM3	CKLF like MARVEL transmembrane domain containing 3	1.13277	9.19837	16.846	2.16301e-12	1.14256e-10	18.4973
11732933_a_at	861	RUNX1	runt related transcription factor 1	1.13249	7.69274	11.2239	1.64263e-09	3.43626e-08	11.6286
11732933_a_at	100506403	LOC100506403	uncharacterized LOC100506403	1.13249	7.69274	11.2239	1.64263e-09	3.43626e-08	11.6286
11739641_a_at	60312	AFAP1	actin filament associated protein 1	1.13191	10.3515	16.4113	3.35582e-12	1.65765e-10	18.0443
11719344_a_at	467	ATF3	activating transcription factor 3	1.13149	6.73324	12.4954	2.97838e-10	7.72056e-09	13.4009
11717237_s_at	262	AMD1	adenosylmethionine decarboxylase 1	1.13145	9.51015	14.66	2.19746e-11	8.19001e-10	16.1022
11724350_s_at	81706	PPP1R14C	protein phosphatase 1 regulatory inhibitor subunit 14C	1.13139	5.95863	11.9525	6.06692e-10	1.42992e-08	12.6626
11759417_s_at	3313	HSPA9	heat shock protein family A (Hsp70) member 9	1.13118	8.56124	14.1752	3.82535e-11	1.32963e-09	15.5283
11749782_x_at	586	BCAT1	branched chain amino acid transaminase 1	1.13112	8.62787	11.4554	1.19069e-09	2.58819e-08	11.9626
11727153_s_at	55227	LRRC1	leucine rich repeat containing 1	1.13068	8.21938	16.4783	3.13391e-12	1.56206e-10	18.1149
11756653_x_at	2246	FGF1	fibroblast growth factor 1	1.13063	5.91751	8.92421	5.42121e-08	7.37354e-07	7.9986
11745587_x_at	51174	TUBD1	tubulin delta 1	1.13011	5.96708	10.2342	6.89874e-09	1.21427e-07	10.1385
11723580_at	221710	SMIM13	small integral membrane protein 13	1.12932	9.58985	17.6446	9.9048e-13	5.85709e-11	19.3019
11743444_s_at	388	RHOB	ras homolog family member B	1.12924	9.03327	12.455	3.13788e-10	8.09613e-09	13.3467
11743043_a_at	10516	FBLN5	fibulin 5	1.12881	11.1957	14.1645	3.87316e-11	1.34433e-09	15.5155
11726752_at	203197	TMEM268	transmembrane protein 268	1.12774	8.06824	15.1626	1.2572e-11	5.06719e-10	16.6799
11719071_s_at	6782	HSPA13	heat shock protein family A (Hsp70) member 13	1.12757	11.0875	9.87536	1.19029e-08	1.95467e-07	9.57218
11736556_s_at	144195	SLC2A14	solute carrier family 2 member 14	1.12572	7.50844	11.6143	9.57432e-10	2.13749e-08	12.189
11736556_s_at	6515	SLC2A3	solute carrier family 2 member 3	1.12572	7.50844	11.6143	9.57432e-10	2.13749e-08	12.189
11715352_x_at	1277	COL1A1	collagen type I alpha 1 chain	1.12559	11.7586	13.6026	7.51872e-11	2.38093e-09	14.8283
11721335_x_at	5352	PLOD2	procollagen-lysine,2-oxoglutarate 5-dioxygenase 2	1.12471	11.9709	17.1983	1.5265e-12	8.46073e-11	18.8565
11751553_a_at	91614	DEPDC7	DEP domain containing 7	1.12458	5.89339	11.593	9.85739e-10	2.19376e-08	12.1587
11719259_s_at	80176	SPSB1	splA/ryanodine receptor domain and SOCS box containing 1	1.12287	5.845	11.098	1.96104e-09	4.00471e-08	11.4446
11755540_a_at	54517	PUS7	pseudouridylate synthase 7 (putative)	1.12269	5.88314	16.8189	2.22244e-12	1.16525e-10	18.4693
11743759_a_at	56990	CDC42SE2	CDC42 small effector 2	1.12229	6.25306	11.4728	1.16254e-09	2.53814e-08	11.9875
11723309_at	8793	TNFRSF10D	TNF receptor superfamily member 10d	1.12168	6.55629	4.05646	0.000753806	0.00320998	-1.79461
11741149_x_at	6520	SLC3A2	solute carrier family 3 member 2	1.12123	10.3012	12.9526	1.66751e-10	4.68939e-09	14.0025
11760128_x_at	3987	LIMS1	LIM zinc finger domain containing 1	1.12112	10.7841	6.88341	2.05151e-06	1.79113e-05	4.23679
11750105_x_at	3182	HNRNPAB	heterogeneous nuclear ribonucleoprotein A/B	1.12036	10.9958	17.3405	1.32854e-12	7.54654e-11	18.9996
11717450_a_at	140609	NEK7	NIMA related kinase 7	1.11989	5.77206	9.47599	2.22121e-08	3.35487e-07	8.92454
11760127_at	3987	LIMS1	LIM zinc finger domain containing 1	1.11927	10.68	6.77908	2.50733e-06	2.13341e-05	4.0297
11719587_a_at	85377	MICALL1	MICAL like 1	1.11883	9.22224	12.3321	3.67944e-10	9.28206e-09	13.1815
11760009_at	NA	NA	NA	1.11867	4.77187	14.3794	3.02285e-11	1.08104e-09	15.7721
11729819_a_at	3479	IGF1	insulin like growth factor 1	1.1182	7.57828	9.39729	2.51718e-08	3.74793e-07	8.79471
11729157_a_at	4239	MFAP4	microfibrillar associated protein 4	1.11748	10.4697	12.1431	4.71273e-10	1.15359e-08	12.9247
11755562_a_at	2863	GPR39	G protein-coupled receptor 39	1.11744	4.47071	8.69679	7.91457e-08	1.02763e-06	7.6061
11723590_a_at	79573	TTC13	tetratricopeptide repeat domain 13	1.11655	8.96604	14.9828	1.53228e-11	6.00953e-10	16.4752
11733071_a_at	6520	SLC3A2	solute carrier family 3 member 2	1.1156	10.2714	14.0671	4.33828e-11	1.4901e-09	15.398
11719442_a_at	81029	WNT5B	Wnt family member 5B	1.11514	6.41788	11.2386	1.60905e-09	3.37887e-08	11.65
11721581_at	84254	CAMKK1	calcium/calmodulin dependent protein kinase kinase 1	1.11466	7.30094	12.5663	2.71909e-10	7.11695e-09	13.4953
11759308_s_at	9223	MAGI1	membrane associated guanylate kinase, WW and PDZ domain containing 1	1.11436	7.2005	13.1741	1.26659e-10	3.69417e-09	14.2877
11720231_s_at	26136	TES	testin LIM domain protein	1.11394	8.63797	12.596	2.61792e-10	6.91855e-09	13.5347
11758456_s_at	2673	GFPT1	glutamine--fructose-6-phosphate transaminase 1	1.11255	9.07635	9.02797	4.5712e-08	6.35002e-07	8.17554
11758838_at	9517	SPTLC2	serine palmitoyltransferase long chain base subunit 2	1.11247	9.23574	16.1072	4.59085e-12	2.13554e-10	17.7208
11724817_a_at	30011	SH3KBP1	SH3 domain containing kinase binding protein 1	1.1114	6.6744	9.43859	2.35702e-08	3.54269e-07	8.86295
11725265_at	1286	COL4A4	collagen type IV alpha 4 chain	1.11093	3.37329	6.07249	1.01431e-05	7.28008e-05	2.59016
11748721_a_at	9361	LONP1	lon peptidase 1, mitochondrial	1.1108	10.0722	14.8166	1.84336e-11	7.03989e-10	16.284
11744138_at	57118	CAMK1D	calcium/calmodulin dependent protein kinase ID	1.11033	6.77089	10.1361	7.99678e-09	1.38295e-07	9.98515
11724816_a_at	30011	SH3KBP1	SH3 domain containing kinase binding protein 1	1.11011	8.95504	13.6303	7.27328e-11	2.31208e-09	14.8627
11739198_a_at	11056	DDX52	DExD-box helicase 52	1.10975	4.64963	4.71608	0.000176665	0.000900595	-0.330347
11756230_a_at	2317	FLNB	filamin B	1.10946	8.4438	14.4113	2.91437e-11	1.04907e-09	15.81
11739310_a_at	1739	DLG1	discs large MAGUK scaffold protein 1	1.10927	7.71262	9.54217	2.00057e-08	3.06179e-07	9.03314
11749066_s_at	633	BGN	biglycan	1.10814	7.3469	9.51722	2.08094e-08	3.16814e-07	8.99226
11729575_a_at	7494	XBP1	X-box binding protein 1	1.10799	10.3941	14.0238	4.5633e-11	1.55551e-09	15.3456
11754059_x_at	6678	SPARC	secreted protein acidic and cysteine rich	1.10779	11.9758	14.4766	2.70522e-11	9.78765e-10	15.887
11754399_a_at	55298	RNF121	ring finger protein 121	1.10772	7.02603	11.2932	1.49107e-09	3.15386e-08	11.7291
11719611_at	84890	ADO	2-aminoethanethiol dioxygenase	1.10751	9.10351	15.8952	5.72925e-12	2.59441e-10	17.4921
11751971_a_at	60676	PAPPA2	pappalysin 2	1.10737	4.36042	8.8269	6.36912e-08	8.4833e-07	7.83143
11759716_x_at	339044	PKD1P1	polycystin 1, transient receptor potential channel interacting pseudogene 1	1.10487	7.61573	9.71142	1.53437e-08	2.42477e-07	9.30856
11759716_x_at	100288332	NPIPA5	nuclear pore complex interacting protein family member A5	1.10487	7.61573	9.71142	1.53437e-08	2.42477e-07	9.30856
11759716_x_at	101059938	NPIPA7	nuclear pore complex interacting protein family member A7	1.10487	7.61573	9.71142	1.53437e-08	2.42477e-07	9.30856
11759716_x_at	101059953	NPIPA8	nuclear pore complex interacting protein family member A8	1.10487	7.61573	9.71142	1.53437e-08	2.42477e-07	9.30856
11756148_x_at	23187	PHLDB1	pleckstrin homology like domain family B member 1	1.10453	9.26987	12.8878	1.80849e-10	5.03155e-09	13.9184
11736555_s_at	144195	SLC2A14	solute carrier family 2 member 14	1.10395	8.96431	11.2783	1.52225e-09	3.21021e-08	11.7076
11736555_s_at	6515	SLC2A3	solute carrier family 2 member 3	1.10395	8.96431	11.2783	1.52225e-09	3.21021e-08	11.7076
11721092_a_at	7057	THBS1	thrombospondin 1	1.10311	12.438	13.063	1.45318e-10	4.17441e-09	14.1452
11752182_a_at	1739	DLG1	discs large MAGUK scaffold protein 1	1.10272	6.10238	11.3728	1.33476e-09	2.86362e-08	11.8441
11746019_a_at	80745	THUMPD2	THUMP domain containing 2	1.10237	7.12565	10.1947	7.32085e-09	1.27882e-07	10.0768
11747735_x_at	3987	LIMS1	LIM zinc finger domain containing 1	1.1022	10.4648	10.5688	4.1995e-09	7.86136e-08	10.6539
11724736_x_at	10630	PDPN	podoplanin	1.10196	3.04746	12.2087	4.32304e-10	1.07306e-08	13.0143
11724284_at	55691	FRMD4A	FERM domain containing 4A	1.10182	7.75078	11.6949	8.58057e-10	1.94191e-08	12.3027
11744287_x_at	875	CBS	cystathionine-beta-synthase	1.10174	7.98968	12.5728	2.69658e-10	7.07298e-09	13.504
11744287_x_at	102724560	CBSL	cystathionine-beta-synthase like	1.10174	7.98968	12.5728	2.69658e-10	7.07298e-09	13.504
11721093_a_at	7057	THBS1	thrombospondin 1	1.10032	11.7876	17.4832	1.1569e-12	6.67376e-11	19.142
11718591_at	23753	SDF2L1	stromal cell derived factor 2 like 1	1.09975	8.62403	10.757	3.19316e-09	6.16963e-08	10.9384
11717756_s_at	5898	RALA	RAS like proto-oncogene A	1.0994	11.268	19.7486	1.45971e-13	1.1844e-11	21.2684
11730755_a_at	51060	TXNDC12	thioredoxin domain containing 12	1.09929	9.67512	13.3026	1.08166e-10	3.21155e-09	14.4513
11728762_x_at	861	RUNX1	runt related transcription factor 1	1.0989	6.3084	11.6275	9.40421e-10	2.10852e-08	12.2076
11728762_x_at	100506403	LOC100506403	uncharacterized LOC100506403	1.0989	6.3084	11.6275	9.40421e-10	2.10852e-08	12.2076
11744541_a_at	57007	ACKR3	atypical chemokine receptor 3	1.0983	5.89676	9.52983	2.0399e-08	3.11427e-07	9.01294
11722304_a_at	9208	LRRFIP1	LRR binding FLII interacting protein 1	1.09819	7.96342	7.73214	4.2363e-07	4.48984e-06	5.86768
11748709_a_at	2736	GLI2	GLI family zinc finger 2	1.09751	7.38845	13.8915	5.33109e-11	1.76851e-09	15.1845
11716490_a_at	12	SERPINA3	serpin family A member 3	1.09683	5.57308	9.14386	3.78412e-08	5.37432e-07	8.37162
11760828_at	100191039	RPL36AP33	ribosomal protein L36a pseudogene 33	1.0962	5.82315	6.25077	7.08425e-06	5.2942e-05	2.95933
11723164_a_at	131578	LRRC15	leucine rich repeat containing 15	1.09571	6.07942	7.76079	4.02335e-07	4.29357e-06	5.92107
11721117_at	60559	SPCS3	signal peptidase complex subunit 3	1.09339	9.43776	17.536	1.09939e-12	6.37915e-11	19.1945
11721983_a_at	55022	PID1	phosphotyrosine interaction domain containing 1	1.09332	9.79509	16.3733	3.48893e-12	1.70637e-10	18.0041
11719276_at	63875	MRPL17	mitochondrial ribosomal protein L17	1.0928	6.88783	11.1652	1.78361e-09	3.68446e-08	11.5431
11748179_a_at	257194	NEGR1	neuronal growth regulator 1	1.0917	6.27012	10.093	8.5353e-09	1.46584e-07	9.91748
11744285_a_at	875	CBS	cystathionine-beta-synthase	1.09128	8.52423	15.9927	5.17251e-12	2.3771e-10	17.5976
11744285_a_at	102724560	CBSL	cystathionine-beta-synthase like	1.09128	8.52423	15.9927	5.17251e-12	2.3771e-10	17.5976
11744024_a_at	4141	MARS	methionyl-tRNA synthetase	1.09057	10.2263	15.321	1.05781e-11	4.36301e-10	16.8584
11724969_at	57478	USP31	ubiquitin specific peptidase 31	1.09037	7.06859	16.1932	4.19934e-12	1.99087e-10	17.8128
11749480_a_at	9361	LONP1	lon peptidase 1, mitochondrial	1.08879	9.97457	14.4717	2.72037e-11	9.83528e-10	15.8813
11755767_a_at	9853	RUSC2	RUN and SH3 domain containing 2	1.08862	9.70671	14.1022	4.16414e-11	1.43427e-09	15.4404
11746394_a_at	4897	NRCAM	neuronal cell adhesion molecule	1.08825	3.53016	4.90363	0.000117608	0.000629093	0.0830224
11745804_s_at	3987	LIMS1	LIM zinc finger domain containing 1	1.08825	11.4886	11.3574	1.36363e-09	2.91545e-08	11.8218
11743110_at	10135	NAMPT	nicotinamide phosphoribosyltransferase	1.08806	9.11842	9.77053	1.39964e-08	2.24628e-07	9.40397
11717704_x_at	3801	KIFC3	kinesin family member C3	1.08726	8.83669	9.47016	2.24184e-08	3.38189e-07	8.91495
11725963_a_at	9361	LONP1	lon peptidase 1, mitochondrial	1.08713	10.0223	13.853	5.57933e-11	1.83488e-09	15.1374
11743252_a_at	800	CALD1	caldesmon 1	1.08615	10.3139	6.11161	9.37156e-06	6.7913e-05	2.6715
11749780_a_at	586	BCAT1	branched chain amino acid transaminase 1	1.08599	7.96046	12.803	2.01221e-10	5.5177e-09	13.8076
11746637_a_at	4141	MARS	methionyl-tRNA synthetase	1.08565	8.31176	10.2174	7.07495e-09	1.2422e-07	10.1123
11743915_s_at	23231	SEL1L3	SEL1L family member 3	1.08556	9.7268	13.2374	1.17165e-10	3.44159e-09	14.3685
11748467_a_at	5832	ALDH18A1	aldehyde dehydrogenase 18 family member A1	1.08551	8.94071	10.8197	2.91671e-09	5.68132e-08	11.0324
11759841_at	259232	NALCN	sodium leak channel, non-selective	1.08529	4.88207	8.17397	1.9357e-07	2.25094e-06	6.6789
11719434_a_at	2118	ETV4	ETS variant 4	1.0846	6.30233	10.8642	2.73578e-09	5.36692e-08	11.0989
11722991_a_at	1756	DMD	dystrophin	1.08375	7.67714	8.16787	1.95643e-07	2.26989e-06	6.66786
11729384_s_at	219771	CCNY	cyclin Y	1.08313	7.97968	8.54357	1.02497e-07	1.28955e-06	7.33797
11749114_x_at	1739	DLG1	discs large MAGUK scaffold protein 1	1.0829	6.7574	14.0476	4.43835e-11	1.51858e-09	15.3744
11718161_at	51621	KLF13	Kruppel like factor 13	1.08205	6.41374	7.91623	3.04727e-07	3.36428e-06	6.2088
11745912_a_at	57162	PELI1	pellino E3 ubiquitin protein ligase 1	1.08169	6.01855	9.52316	2.0615e-08	3.14144e-07	9.002
11724225_a_at	79017	GGCT	gamma-glutamylcyclotransferase	1.08115	8.62736	14.6059	2.33588e-11	8.60866e-10	16.039
11752419_a_at	3096	HIVEP1	human immunodeficiency virus type I enhancer binding protein 1	1.08104	6.85764	9.27956	3.03914e-08	4.42418e-07	8.59914
11727154_at	55227	LRRC1	leucine rich repeat containing 1	1.08082	5.89412	12.175	4.51889e-10	1.1133e-08	12.9683
11718286_a_at	5412	UBL3	ubiquitin like 3	1.07858	7.57209	8.80059	6.65407e-08	8.80596e-07	7.78603
11746600_a_at	55283	MCOLN3	mucolipin 3	1.07837	5.41792	6.37153	5.56865e-06	4.30249e-05	3.20714
11722403_a_at	51177	PLEKHO1	pleckstrin homology domain containing O1	1.07806	8.94321	17.0826	1.71048e-12	9.29741e-11	18.7392
11718210_s_at	5831	PYCR1	pyrroline-5-carboxylate reductase 1	1.0775	9.11477	11.9322	6.23414e-10	1.46445e-08	12.6343
11734068_a_at	6747	SSR3	signal sequence receptor subunit 3	1.07697	11.1857	15.8726	5.867e-12	2.64952e-10	17.4675
11750417_a_at	10216	PRG4	proteoglycan 4	1.07676	4.31437	8.56566	9.8729e-08	1.25137e-06	7.37681
11737271_a_at	390980	ZNF805	zinc finger protein 805	1.07586	6.75039	15.0569	1.41203e-11	5.60003e-10	16.5598
11741155_x_at	3987	LIMS1	LIM zinc finger domain containing 1	1.07581	9.90367	8.54647	1.01994e-07	1.28453e-06	7.34308
11751116_a_at	87	ACTN1	actinin alpha 1	1.074	9.55445	11.019	2.19316e-09	4.41622e-08	11.3285
11744952_at	79160	LINC01711	long intergenic non-protein coding RNA 1711	1.07322	5.90417	9.50777	2.11225e-08	3.20989e-07	8.97675
11717115_at	64781	CERK	ceramide kinase	1.07263	8.38882	13.3373	1.03677e-10	3.10134e-09	14.4953
11731643_s_at	7109	TRAPPC10	trafficking protein particle complex 10	1.07241	7.68959	15.0059	1.49378e-11	5.87294e-10	16.5016
11731643_s_at	102724200	LOC102724200	trafficking protein particle complex subunit 10-like	1.07241	7.68959	15.0059	1.49378e-11	5.87294e-10	16.5016
11739471_a_at	9223	MAGI1	membrane associated guanylate kinase, WW and PDZ domain containing 1	1.07129	7.26939	14.2306	3.58788e-11	1.26034e-09	15.5947
11758575_s_at	6424	SFRP4	secreted frizzled related protein 4	1.06911	4.12167	7.11723	1.31557e-06	1.21245e-05	4.69566
11744650_x_at	23187	PHLDB1	pleckstrin homology like domain family B member 1	1.0687	8.99733	12.1346	4.76571e-10	1.16483e-08	12.9131
11747432_a_at	8038	ADAM12	ADAM metallopeptidase domain 12	1.06864	4.73878	11.1489	1.82499e-09	3.76054e-08	11.5193
11722022_s_at	8851	CDK5R1	cyclin dependent kinase 5 regulatory subunit 1	1.06776	4.80645	8.02418	2.5172e-07	2.83672e-06	6.40674
11738606_a_at	57528	KCTD16	potassium channel tetramerization domain containing 16	1.06729	5.28538	10.1997	7.26552e-09	1.2716e-07	10.0847
11763984_s_at	84725	PLEKHA8	pleckstrin homology domain containing A8	1.06625	8.09774	11.6978	8.54624e-10	1.9368e-08	12.3069
11724959_s_at	5218	CDK14	cyclin dependent kinase 14	1.06599	10.1901	13.6555	7.05689e-11	2.25595e-09	14.894
11746697_a_at	6520	SLC3A2	solute carrier family 3 member 2	1.06582	10.3143	14.7473	1.99208e-11	7.5323e-10	16.2037
11764253_s_at	402778	IFITM10	interferon induced transmembrane protein 10	1.06504	5.75299	12.2466	4.11384e-10	1.02525e-08	13.0657
11728427_at	121457	IKBIP	IKBKB interacting protein	1.0635	8.67564	12.2499	4.09607e-10	1.02133e-08	13.0702
11726652_a_at	9743	ARHGAP32	Rho GTPase activating protein 32	1.06227	6.83937	9.3352	2.77961e-08	4.09455e-07	8.69178
11727103_at	10642	IGF2BP1	insulin like growth factor 2 mRNA binding protein 1	1.05919	6.91859	11.9114	6.40957e-10	1.50067e-08	12.6055
11719032_a_at	3995	FADS3	fatty acid desaturase 3	1.05886	9.2747	12.0686	5.19955e-10	1.24989e-08	12.8227
11754058_a_at	6678	SPARC	secreted protein acidic and cysteine rich	1.05875	10.9492	11.5668	1.02177e-09	2.26682e-08	12.1215
11742207_a_at	1462	VCAN	versican	1.05843	11.1507	13.7293	6.46166e-11	2.08488e-09	14.9853
11755050_s_at	5332	PLCB4	phospholipase C beta 4	1.05708	9.72495	11.7294	8.18865e-10	1.86687e-08	12.3513
11727262_at	57089	ENTPD7	ectonucleoside triphosphate diphosphohydrolase 7	1.05449	6.88143	9.78587	1.36675e-08	2.19706e-07	9.42866
11754529_x_at	6520	SLC3A2	solute carrier family 3 member 2	1.0544	10.5745	12.5875	2.64645e-10	6.97478e-09	13.5234
11763593_a_at	64283	ARHGEF28	Rho guanine nucleotide exchange factor 28	1.05424	5.93256	12.7488	2.15502e-10	5.86703e-09	13.7365
11731075_a_at	57611	ISLR2	immunoglobulin superfamily containing leucine rich repeat 2	1.05359	6.14958	9.0591	4.3443e-08	6.07575e-07	8.22837
11743970_x_at	87	ACTN1	actinin alpha 1	1.05334	11.5797	15.1588	1.26239e-11	5.08396e-10	16.6756
11761319_x_at	105369154	PKD1P6-NPIPP1	PKD1P6-NPIPP1 readthrough	1.05301	7.59192	12.2643	4.01978e-10	1.00383e-08	13.0897
11715453_a_at	1284	COL4A2	collagen type IV alpha 2 chain	1.05297	9.60436	9.32189	2.83952e-08	4.1642e-07	8.66965
11729185_at	56902	PNO1	partner of NOB1 homolog	1.05253	8.38383	12.0988	4.99639e-10	1.20986e-08	12.864
11739687_a_at	83641	FAM107B	family with sequence similarity 107 member B	1.05159	8.98588	11.6674	8.90741e-10	2.01036e-08	12.2639
11749864_a_at	57381	RHOJ	ras homolog family member J	1.05093	7.69164	13.5036	8.47186e-11	2.63554e-09	14.7046
11718710_a_at	6548	SLC9A1	solute carrier family 9 member A1	1.05052	9.2485	12.6124	2.5635e-10	6.80688e-09	13.5565
11721659_at	8543	LMO4	LIM domain only 4	1.04998	8.20715	10.5185	4.52159e-09	8.38501e-08	10.5772
11728097_a_at	9696	CROCC	ciliary rootlet coiled-coil, rootletin	1.04919	6.21421	10.8651	2.73237e-09	5.36235e-08	11.1002
11725392_a_at	84549	MAK16	MAK16 homolog	1.04768	8.06027	14.9866	1.52598e-11	5.98958e-10	16.4795
11723147_a_at	89795	NAV3	neuron navigator 3	1.04767	9.51789	12.9539	1.66473e-10	4.68425e-09	14.0043
11741154_s_at	3987	LIMS1	LIM zinc finger domain containing 1	1.04756	10.7501	8.14889	2.02234e-07	2.33705e-06	6.63353
11757156_s_at	677838	SNORA61	small nucleolar RNA, H/ACA box 61	1.04737	6.89976	13.9486	4.98437e-11	1.66925e-09	15.2542
11757156_s_at	85028	SNHG12	small nucleolar RNA host gene 12	1.04737	6.89976	13.9486	4.98437e-11	1.66925e-09	15.2542
11755845_x_at	4141	MARS	methionyl-tRNA synthetase	1.04731	10.3573	15.0427	1.43432e-11	5.67481e-10	16.5436
11733000_at	3383	ICAM1	intercellular adhesion molecule 1	1.04691	6.22734	13.4812	8.70398e-11	2.69252e-09	14.6766
11747856_a_at	9644	SH3PXD2A	SH3 and PX domains 2A	1.0466	6.10237	7.19807	1.13019e-06	1.06166e-05	4.85262
11728426_s_at	54887	UHRF1BP1	UHRF1 binding protein 1	1.04649	8.3192	13.004	1.56398e-10	4.45391e-09	14.069
11735476_a_at	114299	PALM2	paralemmin 2	1.0456	3.96725	9.39607	2.52208e-08	3.75317e-07	8.79269
11751454_x_at	4232	MEST	mesoderm specific transcript	1.04543	7.23886	6.62131	3.40571e-06	2.80099e-05	3.71382
11741582_a_at	6520	SLC3A2	solute carrier family 3 member 2	1.04483	10.4487	14.6514	2.21875e-11	8.2507e-10	16.0922
11716049_a_at	10221	TRIB1	tribbles pseudokinase 1	1.04371	4.75824	6.06086	1.0385e-05	7.43319e-05	2.56594
11719958_at	8879	SGPL1	sphingosine-1-phosphate lyase 1	1.04359	7.66471	12.9545	1.66359e-10	4.6837e-09	14.005
11718220_x_at	3182	HNRNPAB	heterogeneous nuclear ribonucleoprotein A/B	1.04313	10.5315	18.2148	5.78059e-13	3.7449e-11	19.8559
11748311_s_at	1462	VCAN	versican	1.04291	10.0004	11.1831	1.7394e-09	3.60668e-08	11.5691
11754206_a_at	3097	HIVEP2	human immunodeficiency virus type I enhancer binding protein 2	1.04288	7.6766	9.51352	2.09312e-08	3.18571e-07	8.9862
11745572_s_at	23333	DPY19L1	dpy-19 like 1	1.04285	7.3763	10.8193	2.9183e-09	5.68219e-08	11.0319
11745572_s_at	102724668	DPY19L1P2	DPY19L1 pseudogene 2	1.04285	7.3763	10.8193	2.9183e-09	5.68219e-08	11.0319
11724317_a_at	2246	FGF1	fibroblast growth factor 1	1.0422	6.95734	13.2257	1.18852e-10	3.48701e-09	14.3536
11736706_a_at	11234	HPS5	HPS5, biogenesis of lysosomal organelles complex 2 subunit 2	1.04194	7.27173	15.0617	1.40448e-11	5.57455e-10	16.5653
11747877_x_at	262	AMD1	adenosylmethionine decarboxylase 1	1.041	8.80216	13.7952	5.97492e-11	1.95072e-09	15.0664
11725510_a_at	9057	SLC7A6	solute carrier family 7 member 6	1.04	7.69784	12.3863	3.42924e-10	8.71753e-09	13.2546
11754610_a_at	11153	FICD	FIC domain containing	1.0399	7.54897	8.98133	4.93462e-08	6.79763e-07	8.09617
11729186_at	56902	PNO1	partner of NOB1 homolog	1.03974	8.0403	11.8397	7.05589e-10	1.63421e-08	12.5058
11726309_a_at	2743	GLRB	glycine receptor beta	1.03959	7.48613	10.4872	4.73498e-09	8.72517e-08	10.5293
11724414_a_at	7552	ZNF711	zinc finger protein 711	1.03852	5.46422	9.53907	2.01037e-08	3.07488e-07	9.02807
11730739_a_at	8572	PDLIM4	PDZ and LIM domain 4	1.03696	8.93167	12.348	3.60419e-10	9.10531e-09	13.203
11728827_at	2150	F2RL1	F2R like trypsin receptor 1	1.03664	5.45089	7.71443	4.37369e-07	4.61667e-06	5.83464
11741680_a_at	5270	SERPINE2	serpin family E member 2	1.03662	12.8042	15.9649	5.32487e-12	2.43524e-10	17.5677
11745036_at	3084	NRG1	neuregulin 1	1.03648	5.42199	8.74784	7.2661e-08	9.51921e-07	7.69476
11739469_at	84910	TMEM87B	transmembrane protein 87B	1.03571	7.79881	12.2678	4.00117e-10	1.0007e-08	13.0946
11747072_s_at	84617	TUBB6	tubulin beta 6 class V	1.03451	11.6379	16.6722	2.57525e-12	1.32497e-10	18.3174
11720681_at	92610	TIFA	TRAF interacting protein with forkhead associated domain	1.0344	3.86121	8.78887	6.78514e-08	8.96265e-07	7.7658
11753649_s_at	6428	SRSF3	serine and arginine rich splicing factor 3	1.03371	10.4544	16.4832	3.11831e-12	1.55743e-10	18.12
11724968_at	57478	USP31	ubiquitin specific peptidase 31	1.03342	7.63943	9.33033	2.8014e-08	4.11685e-07	8.68367
11763460_at	285513	GPRIN3	GPRIN family member 3	1.03275	5.12445	6.42489	5.0098e-06	3.92528e-05	3.31607
11759884_a_at	8028	MLLT10	myeloid/lymphoid or mixed-lineage leukemia; translocated to, 10	1.03268	6.23262	11.7349	8.12715e-10	1.8537e-08	12.3591
11719789_x_at	7280	TUBB2A	tubulin beta 2A class IIa	1.03213	10.5851	12.7267	2.21635e-10	6.01416e-09	13.7074
11757146_at	100124534	SNORA84	small nucleolar RNA, H/ACA box 84	1.0317	5.29322	7.67662	4.68288e-07	4.90226e-06	5.76393
11715301_s_at	51491	NOP16	NOP16 nucleolar protein	1.0315	8.96161	12.9443	1.68495e-10	4.72769e-09	13.9917
11725393_s_at	84549	MAK16	MAK16 homolog	1.03147	8.87209	13.8745	5.43893e-11	1.79706e-09	15.1638
11741378_s_at	60468	BACH2	BTB domain and CNC homolog 2	1.02989	6.83082	12.7335	2.19735e-10	5.96914e-09	13.7163
11720646_at	9517	SPTLC2	serine palmitoyltransferase long chain base subunit 2	1.02937	8.17398	14.3364	3.17565e-11	1.12997e-09	15.7211
11740227_s_at	185	AGTR1	angiotensin II receptor type 1	1.02883	5.44392	7.65802	4.84325e-07	5.0488e-06	5.72908
11752051_a_at	4627	MYH9	myosin heavy chain 9	1.02783	9.0439	9.93967	1.07833e-08	1.79885e-07	9.67474
11740529_s_at	3093	UBE2K	ubiquitin conjugating enzyme E2 K	1.0277	7.52691	6.20293	7.79724e-06	5.75749e-05	2.86066
11724355_x_at	339044	PKD1P1	polycystin 1, transient receptor potential channel interacting pseudogene 1	1.0268	10.5276	8.42773	1.24866e-07	1.53394e-06	7.1333
11724355_x_at	730153	NPIPB10P	nuclear pore complex interacting protein family, member B10, pseudogene	1.0268	10.5276	8.42773	1.24866e-07	1.53394e-06	7.1333
11724355_x_at	100288332	NPIPA5	nuclear pore complex interacting protein family member A5	1.0268	10.5276	8.42773	1.24866e-07	1.53394e-06	7.1333
11724355_x_at	101059938	NPIPA7	nuclear pore complex interacting protein family member A7	1.0268	10.5276	8.42773	1.24866e-07	1.53394e-06	7.1333
11724355_x_at	101059953	NPIPA8	nuclear pore complex interacting protein family member A8	1.0268	10.5276	8.42773	1.24866e-07	1.53394e-06	7.1333
11724355_x_at	102724993	LOC102724993	nuclear pore complex-interacting protein family member A7-like	1.0268	10.5276	8.42773	1.24866e-07	1.53394e-06	7.1333
11724355_x_at	105376752	LOC105376752	nuclear pore complex-interacting protein family member A5	1.0268	10.5276	8.42773	1.24866e-07	1.53394e-06	7.1333
11734993_at	6497	SKI	SKI proto-oncogene	1.02676	9.79808	13.6208	7.3562e-11	2.33694e-09	14.8509
11746476_x_at	800	CALD1	caldesmon 1	1.02641	11.1313	9.11051	3.99492e-08	5.64295e-07	8.31536
11729026_a_at	649	BMP1	bone morphogenetic protein 1	1.02635	7.18135	12.3737	3.48574e-10	8.85205e-09	13.2376
11740133_a_at	800	CALD1	caldesmon 1	1.02548	11.1104	7.77347	3.93273e-07	4.20683e-06	5.94466
11738892_a_at	7168	TPM1	tropomyosin 1 (alpha)	1.02444	9.8707	14.338	3.17007e-11	1.1288e-09	15.7229
11729643_s_at	7163	TPD52	tumor protein D52	1.02434	3.50138	6.10544	9.48908e-06	6.86641e-05	2.65869
11758561_s_at	22808	MRAS	muscle RAS oncogene homolog	1.02418	5.6641	9.46276	2.26831e-08	3.41965e-07	8.90276
11717937_at	85027	SMIM3	small integral membrane protein 3	1.02407	8.49128	13.7038	6.66099e-11	2.14221e-09	14.9538
11761950_x_at	259232	NALCN	sodium leak channel, non-selective	1.02362	3.39845	8.88705	5.76455e-08	7.77428e-07	7.93489
11729666_at	23012	STK38L	serine/threonine kinase 38 like	1.02338	8.95189	13.4976	8.53276e-11	2.65116e-09	14.6972
11754466_a_at	23677	SH3BP4	SH3 domain binding protein 4	1.02268	11.2849	17.2781	1.41192e-12	7.9062e-11	18.9369
11729527_a_at	29954	POMT2	protein O-mannosyltransferase 2	1.02228	7.05555	12.6788	2.35549e-10	6.32927e-09	13.6443
11759641_at	1478	CSTF2	cleavage stimulation factor subunit 2	1.02196	5.82546	9.48672	2.18378e-08	3.30437e-07	8.94219
11722597_a_at	57007	ACKR3	atypical chemokine receptor 3	1.02184	5.97387	8.20915	1.82066e-07	2.13135e-06	6.74239
11740075_at	29958	DMGDH	dimethylglycine dehydrogenase	1.02074	4.7861	13.6031	7.51457e-11	2.38093e-09	14.8289
11720651_x_at	54935	DUSP23	dual specificity phosphatase 23	1.02027	8.6804	13.7798	6.08476e-11	1.98062e-09	15.0476
11737042_s_at	90102	PHLDB2	pleckstrin homology like domain family B member 2	1.01925	7.67012	7.62021	5.18715e-07	5.36772e-06	5.65808
11753549_a_at	123920	CMTM3	CKLF like MARVEL transmembrane domain containing 3	1.01924	8.32432	15.1181	1.32002e-11	5.27044e-10	16.6295
11728516_a_at	9811	CTIF	cap binding complex dependent translation initiation factor	1.01906	8.07649	9.97373	1.02354e-08	1.71788e-07	9.72888
11739472_a_at	9223	MAGI1	membrane associated guanylate kinase, WW and PDZ domain containing 1	1.01771	6.7793	11.5359	1.06585e-09	2.35404e-08	12.0776
11739117_a_at	23167	EFR3A	EFR3 homolog A	1.01771	5.74154	8.4859	1.13058e-07	1.40316e-06	7.23629
11737775_a_at	4839	NOP2	NOP2 nucleolar protein	1.01721	6.55906	9.85056	1.23667e-08	2.0181e-07	9.53249
11741735_a_at	55839	CENPN	centromere protein N	1.01677	5.04484	10.982	2.31173e-09	4.62299e-08	11.2738
11722531_a_at	800	CALD1	caldesmon 1	1.01609	10.9506	7.58102	5.57048e-07	5.7083e-06	5.5843
11717085_a_at	5631	PRPS1	phosphoribosyl pyrophosphate synthetase 1	1.01596	10.6721	13.0183	1.53626e-10	4.38508e-09	14.0875
11718287_at	5412	UBL3	ubiquitin like 3	1.01551	9.46657	12.1252	4.82508e-10	1.17586e-08	12.9002
11750593_a_at	7052	TGM2	transglutaminase 2	1.01508	7.54305	11.624	9.44972e-10	2.11635e-08	12.2026
11754869_s_at	10308	ZNF267	zinc finger protein 267	1.01468	5.65799	12.1794	4.49273e-10	1.10851e-08	12.9743
11716724_x_at	23333	DPY19L1	dpy-19 like 1	1.01456	9.4937	13.5695	7.82399e-11	2.46028e-09	14.787
11731008_a_at	112840	WDR89	WD repeat domain 89	1.01401	5.38525	11.0084	2.22652e-09	4.47792e-08	11.3128
11730935_a_at	80709	AKNA	AT-hook transcription factor	1.01345	5.79264	6.4642	4.63546e-06	3.66271e-05	3.39607
11729711_at	92935	MARS2	methionyl-tRNA synthetase 2, mitochondrial	1.01293	6.78589	9.71384	1.52859e-08	2.4195e-07	9.31248
11743972_a_at	54541	DDIT4	DNA damage inducible transcript 4	1.01277	10.7842	13.0771	1.42793e-10	4.11623e-09	14.1634
11745361_a_at	643911	CRNDE	colorectal neoplasia differentially expressed	1.01273	7.43428	8.91897	5.46832e-08	7.43148e-07	7.98962
11745870_a_at	10797	MTHFD2	methylenetetrahydrofolate dehydrogenase (NADP+ dependent) 2, methenyltetrahydrofolate cyclohydrolase	1.01249	11.1979	15.9299	5.52394e-12	2.51525e-10	17.5298
11749212_a_at	9358	ITGBL1	integrin subunit beta like 1	1.01247	11.372	10.648	3.74039e-09	7.10947e-08	10.7741
11733198_a_at	10212	DDX39A	DExD-box helicase 39A	1.01244	8.68255	12.7906	2.04406e-10	5.59573e-09	13.7914
11734820_a_at	323	APBB2	amyloid beta precursor protein binding family B member 2	1.01235	5.17225	10.2914	6.33179e-09	1.12731e-07	10.2276
11717897_a_at	7803	PTP4A1	protein tyrosine phosphatase type IVA, member 1	1.01235	8.53418	8.53663	1.03711e-07	1.30284e-06	7.32577
11741116_at	2312	FLG	filaggrin	1.01144	2.70796	10.1337	8.0258e-09	1.387e-07	9.98139
11749913_a_at	6782	HSPA13	heat shock protein family A (Hsp70) member 13	1.01095	6.73522	8.74926	7.24891e-08	9.49921e-07	7.69722
11745701_a_at	284207	METRNL	meteorin like, glial cell differentiation regulator	1.01093	8.37594	10.6351	3.8116e-09	7.21986e-08	10.7546
11724716_a_at	54880	BCOR	BCL6 corepressor	1.0108	7.76972	10.9685	2.35671e-09	4.70534e-08	11.2538
11747359_a_at	79960	JADE1	jade family PHD finger 1	1.01055	6.88462	12.4149	3.30474e-10	8.46813e-09	13.293
11743253_x_at	800	CALD1	caldesmon 1	1.01041	11.3577	9.61975	1.77077e-08	2.75005e-07	9.15981
11741749_x_at	79442	LRRC2	leucine rich repeat containing 2	1.00916	6.32186	9.18344	3.54893e-08	5.07819e-07	8.4382
11738592_at	414899	BLID	BH3-like motif containing, cell death inducer	1.00905	4.88776	7.50248	6.42993e-07	6.4777e-06	5.43584
11719069_s_at	6782	HSPA13	heat shock protein family A (Hsp70) member 13	1.00861	9.09903	8.90778	5.57033e-08	7.54836e-07	7.97045
11720314_s_at	533	ATP6V0B	ATPase H+ transporting V0 subunit b	1.00752	10.8561	13.8276	5.74944e-11	1.88581e-09	15.1063
11731640_at	7109	TRAPPC10	trafficking protein particle complex 10	1.00739	8.17272	13.814	5.84297e-11	1.91016e-09	15.0896
11731640_at	102724200	LOC102724200	trafficking protein particle complex subunit 10-like	1.00739	8.17272	13.814	5.84297e-11	1.91016e-09	15.0896
11745205_s_at	7163	TPD52	tumor protein D52	1.00687	3.45485	7.28767	9.5608e-07	9.16189e-06	5.02556
11724392_at	57168	ASPHD2	aspartate beta-hydroxylase domain containing 2	1.00677	6.75896	8.97487	4.98729e-08	6.85493e-07	8.08515
11716774_a_at	26064	RAI14	retinoic acid induced 14	1.00645	8.4917	13.2678	1.12873e-10	3.32738e-09	14.4072
11733061_s_at	57162	PELI1	pellino E3 ubiquitin protein ligase 1	1.00558	7.02874	9.62685	1.75117e-08	2.72389e-07	9.17136
11742711_at	7058	THBS2	thrombospondin 2	1.00404	11.5976	6.90209	1.97942e-06	1.73462e-05	4.27371
11718028_x_at	80324	PUS1	pseudouridylate synthase 1	1.00384	7.38931	9.3144	2.87383e-08	4.20705e-07	8.65718
11746414_a_at	83641	FAM107B	family with sequence similarity 107 member B	1.0033	9.05685	9.89801	1.14953e-08	1.90098e-07	9.60835
11729665_a_at	23012	STK38L	serine/threonine kinase 38 like	1.00315	5.8858	9.35421	2.69637e-08	3.98736e-07	8.72333
11726665_a_at	7090	TLE3	transducin like enhancer of split 3	1.00307	6.37802	9.71272	1.53127e-08	2.42141e-07	9.31066
11732190_at	4853	NOTCH2	notch 2	1.00284	5.99448	13.2428	1.16384e-10	3.42381e-09	14.3754
11722119_at	11178	LZTS1	leucine zipper tumor suppressor 1	1.00218	6.99614	9.92081	1.10998e-08	1.84482e-07	9.6447
11756882_a_at	25914	RTTN	rotatin	1.00182	7.83051	13.3746	9.90599e-11	2.99063e-09	14.5425
11758429_s_at	406953	MIR18A	microRNA 18a	1.00174	3.89201	11.0795	2.01298e-09	4.09673e-08	11.4175
11758429_s_at	406979	MIR19A	microRNA 19a	1.00174	3.89201	11.0795	2.01298e-09	4.09673e-08	11.4175
11758429_s_at	406980	MIR19B1	microRNA 19b-1	1.00174	3.89201	11.0795	2.01298e-09	4.09673e-08	11.4175
11758429_s_at	406982	MIR20A	microRNA 20a	1.00174	3.89201	11.0795	2.01298e-09	4.09673e-08	11.4175
11758429_s_at	407048	MIR92A1	microRNA 92a-1	1.00174	3.89201	11.0795	2.01298e-09	4.09673e-08	11.4175
11758429_s_at	407975	MIR17HG	miR-17-92a-1 cluster host gene	1.00174	3.89201	11.0795	2.01298e-09	4.09673e-08	11.4175
11751230_a_at	29968	PSAT1	phosphoserine aminotransferase 1	1.00165	10.2349	6.46479	4.63005e-06	3.65963e-05	3.39727
11723144_at	259232	NALCN	sodium leak channel, non-selective	1.00164	5.55925	7.49431	6.52701e-07	6.55814e-06	5.42034
11729187_x_at	56902	PNO1	partner of NOB1 homolog	1.00104	8.20445	12.1536	4.64788e-10	1.14167e-08	12.9391
11750107_a_at	23231	SEL1L3	SEL1L family member 3	1.00102	7.65299	11.8686	6.78768e-10	1.57726e-08	12.546
11739952_a_at	54438	GFOD1	glucose-fructose oxidoreductase domain containing 1	1.00066	6.09465	10.0084	9.70757e-09	1.63873e-07	9.78385
11754810_a_at	3693	ITGB5	integrin subunit beta 5	1.00059	11.4519	15.3826	9.8953e-12	4.11175e-10	16.9274
11746018_a_at	65983	GRAMD3	GRAM domain containing 3	1.00036	7.66529	9.74225	1.46249e-08	2.32791e-07	9.35837
11755003_a_at	196883	ADCY4	adenylate cyclase 4	-1.00081	4.58461	-14.2275	3.60039e-11	1.26186e-09	15.5911
11757569_a_at	57446	NDRG3	NDRG family member 3	-1.00095	9.70456	-15.4777	8.93042e-12	3.76906e-10	17.0335
11739552_a_at	9586	CREB5	cAMP responsive element binding protein 5	-1.00147	5.06035	-9.01214	4.69127e-08	6.49676e-07	8.14864
11729075_s_at	4056	LTC4S	leukotriene C4 synthase	-1.00189	7.63049	-10.9719	2.34522e-09	4.68618e-08	11.2589
11729075_s_at	9794	MAML1	mastermind like transcriptional coactivator 1	-1.00189	7.63049	-10.9719	2.34522e-09	4.68618e-08	11.2589
11737536_a_at	401474	SAMD12	sterile alpha motif domain containing 12	-1.00269	3.16071	-11.3358	1.40507e-09	2.99888e-08	11.7908
11723678_at	26586	CKAP2	cytoskeleton associated protein 2	-1.00351	7.60185	-6.9651	1.75508e-06	1.56012e-05	4.39791
11752353_x_at	4776	NFATC4	nuclear factor of activated T-cells 4	-1.00417	7.37612	-12.5255	2.86528e-10	7.48258e-09	13.441
11723788_a_at	83648	FAM167A	family with sequence similarity 167 member A	-1.00421	5.85053	-8.00912	2.58495e-07	2.9045e-06	6.37923
11753979_s_at	5872	RAB13	RAB13, member RAS oncogene family	-1.00422	8.87281	-7.3002	9.34056e-07	8.97169e-06	5.04965
11723514_a_at	8555	CDC14B	cell division cycle 14B	-1.00435	7.93574	-10.8568	2.76513e-09	5.41592e-08	11.0878
11741447_s_at	6038	RNASE4	ribonuclease A family member 4	-1.0045	9.49602	-16.3581	3.54367e-12	1.72632e-10	17.9881
11726007_s_at	283417	DPY19L2	dpy-19 like 2	-1.00576	5.46733	-7.32267	8.95849e-07	8.65678e-06	5.09284
11726007_s_at	554236	DPY19L2P1	DPY19L2 pseudogene 1	-1.00576	5.46733	-7.32267	8.95849e-07	8.65678e-06	5.09284
11745211_a_at	7582	ZNF33B	zinc finger protein 33B	-1.00626	3.99185	-7.66892	4.74861e-07	4.96268e-06	5.7495
11734915_at	9824	ARHGAP11A	Rho GTPase activating protein 11A	-1.00636	3.35956	-8.80333	6.62377e-08	8.77055e-07	7.79077
11746974_a_at	3949	LDLR	low density lipoprotein receptor	-1.00659	6.44963	-9.16102	3.68023e-08	5.24331e-07	8.40051
11743473_x_at	7769	ZNF226	zinc finger protein 226	-1.00683	8.13322	-11.712	8.38337e-10	1.90599e-08	12.3269
11725959_x_at	808	CALM3	calmodulin 3	-1.00737	7.54568	-10.2282	6.96075e-09	1.22388e-07	10.1292
11725959_x_at	805	CALM2	calmodulin 2	-1.00737	7.54568	-10.2282	6.96075e-09	1.22388e-07	10.1292
11715585_a_at	5376	PMP22	peripheral myelin protein 22	-1.00775	10.6606	-16.2854	3.81812e-12	1.8401e-10	17.9111
11741769_s_at	90203	SNX21	sorting nexin family member 21	-1.00776	7.06927	-15.0438	1.43247e-11	5.67201e-10	16.5449
11763873_s_at	100128108	LOC100128108	putative ubiquitin-conjugating enzyme E2Q2-like protein	-1.0078	3.97678	-9.90503	1.1372e-08	1.88247e-07	9.61955
11763873_s_at	400464	LOC400464	ubiquitin conjugating enzyme E2 Q2 pseudogene	-1.0078	3.97678	-9.90503	1.1372e-08	1.88247e-07	9.61955
11759738_at	222068	TMED4	transmembrane p24 trafficking protein 4	-1.00828	8.90002	-14.7415	2.00504e-11	7.56975e-10	16.197
11740881_x_at	3600	IL15	interleukin 15	-1.00839	7.6536	-8.81698	6.47498e-08	8.59886e-07	7.81433
11745465_x_at	25840	METTL7A	methyltransferase like 7A	-1.00877	4.94963	-7.29267	9.47224e-07	9.08406e-06	5.03518
11737860_s_at	10801	SEPT9	septin 9	-1.00899	6.42427	-7.22085	1.08303e-06	1.02318e-05	4.89668
11728716_x_at	6374	CXCL5	C-X-C motif chemokine ligand 5	-1.00937	4.52622	-7.03826	1.52732e-06	1.38022e-05	4.54148
11734373_a_at	79848	CSPP1	centrosome and spindle pole associated protein 1	-1.00964	8.36939	-10.8301	2.87327e-09	5.60996e-08	11.048
11728084_a_at	8526	DGKE	diacylglycerol kinase epsilon	-1.00979	4.14567	-7.97368	2.75207e-07	3.07342e-06	6.31433
11733529_a_at	9706	ULK2	unc-51 like autophagy activating kinase 2	-1.00984	5.57208	-7.11081	1.33159e-06	1.22549e-05	4.68315
11755091_a_at	10347	ABCA7	ATP binding cassette subfamily A member 7	-1.00991	5.79591	-10.1717	7.57819e-09	1.31839e-07	10.041
11734955_a_at	6322	SCML1	sex comb on midleg like 1 (Drosophila)	-1.01017	7.26582	-6.72568	2.78012e-06	2.33263e-05	3.92315
11719702_a_at	10160	FARP1	FERM, ARH/RhoGEF and pleckstrin domain protein 1	-1.01062	9.43218	-13.7347	6.41997e-11	2.07413e-09	14.992
11745004_x_at	84525	HOPX	HOP homeobox	-1.01093	5.19895	-10.4553	4.96318e-09	9.10499e-08	10.4804
11759404_at	10098	TSPAN5	tetraspanin 5	-1.01101	8.48943	-12.0743	5.16049e-10	1.2411e-08	12.8305
11730831_x_at	84078	KBTBD7	kelch repeat and BTB domain containing 7	-1.01147	6.67345	-10.6347	3.81403e-09	7.2217e-08	10.7539
11726974_a_at	64065	PERP	PERP, TP53 apoptosis effector	-1.01225	9.92242	-13.8698	5.46917e-11	1.80585e-09	15.1581
11744779_a_at	10144	FAM13A	family with sequence similarity 13 member A	-1.01228	6.44125	-11.5352	1.06689e-09	2.35437e-08	12.0766
11727178_x_at	4524	MTHFR	methylenetetrahydrofolate reductase	-1.01328	7.06797	-9.98176	1.01106e-08	1.70039e-07	9.74162
11715955_a_at	10550	ARL6IP5	ADP ribosylation factor like GTPase 6 interacting protein 5	-1.0137	11.2395	-10.5442	4.35431e-09	8.11128e-08	10.6163
11725937_a_at	3958	LGALS3	galectin 3	-1.0137	12.6743	-16.5084	3.03953e-12	1.52423e-10	18.1464
11718492_at	6506	SLC1A2	solute carrier family 1 member 2	-1.01429	5.60839	-8.3273	1.48377e-07	1.78641e-06	6.95446
11716914_a_at	57509	MTUS1	microtubule associated scaffold protein 1	-1.01441	6.10241	-13.0067	1.55867e-10	4.44136e-09	14.0725
11740698_a_at	254268	AKNAD1	AKNA domain containing 1	-1.01446	3.33275	-6.1552	8.58273e-06	6.27663e-05	2.76192
11763324_a_at	8674	VAMP4	vesicle associated membrane protein 4	-1.01529	7.68551	-8.70425	7.81621e-08	1.01619e-06	7.61907
11759151_at	147841	SPC24	SPC24, NDC80 kinetochore complex component	-1.01572	5.06368	-6.83174	2.26544e-06	1.95243e-05	4.1344
11726259_s_at	50862	RNF141	ring finger protein 141	-1.01639	9.7531	-13.9286	5.10278e-11	1.70076e-09	15.2299
11754224_x_at	10156	RASA4	RAS p21 protein activator 4	-1.0167	6.01227	-6.94711	1.81629e-06	1.60703e-05	4.36251
11754224_x_at	102724229	LOC102724229	uncharacterized LOC102724229	-1.0167	6.01227	-6.94711	1.81629e-06	1.60703e-05	4.36251
11721291_a_at	2152	F3	coagulation factor III, tissue factor	-1.01672	10.8234	-8.13004	2.09009e-07	2.40467e-06	6.59939
11734057_a_at	145482	PTGR2	prostaglandin reductase 2	-1.01688	5.04712	-6.03661	1.09084e-05	7.75847e-05	2.51539
11733809_s_at	114928	GPRASP2	G protein-coupled receptor associated sorting protein 2	-1.01728	7.754	-13.8153	5.83409e-11	1.90851e-09	15.0911
11733809_s_at	100528062	ARMCX5-GPRASP2	ARMCX5-GPRASP2 readthrough	-1.01728	7.754	-13.8153	5.83409e-11	1.90851e-09	15.0911
11744913_x_at	4776	NFATC4	nuclear factor of activated T-cells 4	-1.01729	7.37543	-10.8258	2.89124e-09	5.6406e-08	11.0415
11737078_a_at	114769	CARD16	caspase recruitment domain family member 16	-1.01756	3.27516	-7.77127	3.94829e-07	4.22075e-06	5.94057
11742816_a_at	10144	FAM13A	family with sequence similarity 13 member A	-1.01891	7.55543	-12.6549	2.42816e-10	6.49983e-09	13.6127
11757876_s_at	201229	LYRM9	LYR motif containing 9	-1.01897	8.72986	-11.3385	1.3999e-09	2.99042e-08	11.7946
11744809_a_at	57412	AS3MT	arsenite methyltransferase	-1.019	5.597	-7.95155	2.86209e-07	3.17907e-06	6.27373
11744809_a_at	100528007	BORCS7-ASMT	BORCS7-ASMT readthrough (NMD candidate)	-1.019	5.597	-7.95155	2.86209e-07	3.17907e-06	6.27373
11720135_a_at	5627	PROS1	protein S (alpha)	-1.01907	6.98139	-10.7714	3.12735e-09	6.063e-08	10.96
11727029_a_at	4130	MAP1A	microtubule associated protein 1A	-1.01923	8.59284	-7.55344	5.85772e-07	5.96314e-06	5.53227
11726975_x_at	64065	PERP	PERP, TP53 apoptosis effector	-1.01949	9.90798	-13.9663	4.88156e-11	1.64587e-09	15.2758
11735117_at	8674	VAMP4	vesicle associated membrane protein 4	-1.01975	6.26955	-7.44266	7.17656e-07	7.13548e-06	5.3222
11742471_a_at	367	AR	androgen receptor	-1.01977	6.2493	-11.8676	6.79729e-10	1.57875e-08	12.5446
11739547_at	1464	CSPG4	chondroitin sulfate proteoglycan 4	-1.02052	7.71758	-13.7543	6.27198e-11	2.03162e-09	15.0162
11749250_a_at	84217	ZMYND12	zinc finger MYND-type containing 12	-1.02144	4.28033	-8.03404	2.47381e-07	2.79546e-06	6.42475
11736477_a_at	22936	ELL2	elongation factor for RNA polymerase II 2	-1.02226	10.5608	-12.6846	2.33792e-10	6.29916e-09	13.652
11722862_x_at	23321	TRIM2	tripartite motif containing 2	-1.02256	8.52011	-7.07365	1.42835e-06	1.30099e-05	4.61068
11753831_x_at	1033	CDKN3	cyclin dependent kinase inhibitor 3	-1.02293	6.38956	-6.22209	7.50313e-06	5.56106e-05	2.90021
11744185_a_at	57568	SIPA1L2	signal induced proliferation associated 1 like 2	-1.02321	6.81873	-10.6794	3.57332e-09	6.81285e-08	10.8216
11730168_s_at	9516	LITAF	lipopolysaccharide induced TNF factor	-1.02363	10.2637	-13.7667	6.18031e-11	2.00718e-09	15.0314
11742746_a_at	123	PLIN2	perilipin 2	-1.02425	9.73452	-14.183	3.79078e-11	1.32037e-09	15.5377
11739455_a_at	259230	SGMS1	sphingomyelin synthase 1	-1.02471	7.72641	-11.08	2.01135e-09	4.0951e-08	11.4183
11723513_a_at	8555	CDC14B	cell division cycle 14B	-1.02526	8.71955	-12.3973	3.38088e-10	8.62115e-09	13.2693
11719749_a_at	84650	EBPL	emopamil binding protein like	-1.02557	10.3852	-14.0116	4.62935e-11	1.57369e-09	15.3308
11729990_x_at	773	CACNA1A	calcium voltage-gated channel subunit alpha1 A	-1.02559	6.68313	-9.79331	1.35108e-08	2.17469e-07	9.44063
11719886_a_at	10561	IFI44	interferon induced protein 44	-1.02587	7.2996	-5.83486	1.64719e-05	0.000111651	2.09213
11720744_a_at	54677	CROT	carnitine O-octanoyltransferase	-1.02623	7.32492	-9.87778	1.18587e-08	1.94933e-07	9.57605
11732527_a_at	6910	TBX5	T-box 5	-1.02656	6.77352	-7.57965	5.58433e-07	5.72131e-06	5.58173
11724332_at	441150	C6orf226	chromosome 6 open reading frame 226	-1.02718	7.37135	-11.3505	1.37679e-09	2.94233e-08	11.8119
11754360_a_at	6241	RRM2	ribonucleotide reductase regulatory subunit M2	-1.02759	6.30029	-6.26854	6.83688e-06	5.13804e-05	2.99591
11755466_a_at	157313	CDCA2	cell division cycle associated 2	-1.02869	4.83848	-5.48332	3.41922e-05	0.000211755	1.34361
11736805_x_at	7594	ZNF43	zinc finger protein 43	-1.02974	4.79909	-5.70038	2.1742e-05	0.000142664	1.80739
11751651_s_at	5359	PLSCR1	phospholipid scramblase 1	-1.03087	8.36152	-8.12797	2.09768e-07	2.41172e-06	6.59563
11751845_x_at	710	SERPING1	serpin family G member 1	-1.03126	9.00336	-8.6846	8.07827e-08	1.04696e-06	7.58486
11760093_at	NA	NA	NA	-1.03164	6.11422	-5.32189	4.80537e-05	0.000286211	0.995587
11716713_a_at	55114	ARHGAP17	Rho GTPase activating protein 17	-1.03179	8.24948	-11.7849	7.59623e-10	1.74305e-08	12.4292
11757854_s_at	54477	PLEKHA5	pleckstrin homology domain containing A5	-1.03182	9.39216	-10.2345	6.89491e-09	1.21403e-07	10.1391
11741030_a_at	79810	PTCD2	pentatricopeptide repeat domain 2	-1.03211	6.37429	-6.87886	2.06946e-06	1.8049e-05	4.22779
11757005_a_at	2517	FUCA1	fucosidase, alpha-L- 1, tissue	-1.03278	5.50619	-11.312	1.45239e-09	3.08642e-08	11.7564
11737448_x_at	79962	DNAJC22	DnaJ heat shock protein family (Hsp40) member C22	-1.03279	5.62263	-9.24738	3.20071e-08	4.62944e-07	8.54538
11751176_a_at	158471	PRUNE2	prune homolog 2	-1.03332	5.33042	-9.50036	2.13713e-08	3.2457e-07	8.9646
11736361_at	84935	MEDAG	mesenteric estrogen dependent adipogenesis	-1.03334	4.23813	-8.13939	2.05619e-07	2.37048e-06	6.61633
11718425_a_at	84263	HSDL2	hydroxysteroid dehydrogenase like 2	-1.03345	8.65945	-15.988	5.19783e-12	2.38431e-10	17.5926
11735178_a_at	132321	C4orf33	chromosome 4 open reading frame 33	-1.0338	7.09557	-12.3674	3.51451e-10	8.92056e-09	13.2291
11717496_a_at	3613	IMPA2	inositol monophosphatase 2	-1.03429	7.49183	-11.6775	8.7859e-10	1.98475e-08	12.2782
11726626_at	901	CCNG2	cyclin G2	-1.03436	6.81284	-10.2393	6.84557e-09	1.20721e-07	10.1465
11749980_x_at	84525	HOPX	HOP homeobox	-1.03522	4.32023	-10.3152	6.1112e-09	1.09315e-07	10.2644
11716053_a_at	3915	LAMC1	laminin subunit gamma 1	-1.03598	11.0199	-12.3909	3.40904e-10	8.67955e-09	13.2607
11748678_a_at	2149	F2R	coagulation factor II thrombin receptor	-1.03729	7.53748	-11.0786	2.01548e-09	4.10013e-08	11.4162
11758074_s_at	389136	VGLL3	vestigial like family member 3	-1.03804	7.97878	-9.26805	3.09594e-08	4.4976e-07	8.57992
11756306_a_at	83666	PARP9	poly(ADP-ribose) polymerase family member 9	-1.03811	5.61468	-5.37719	4.27512e-05	0.000258329	1.11509
11742724_x_at	6778	STAT6	signal transducer and activator of transcription 6	-1.0386	7.62479	-12.0334	5.44817e-10	1.30081e-08	12.7742
11725727_x_at	54964	C1orf56	chromosome 1 open reading frame 56	-1.03919	6.12853	-12.812	1.98964e-10	5.46791e-09	13.8193
11728570_at	23414	ZFPM2	zinc finger protein, FOG family member 2	-1.04052	8.96067	-15.6285	7.59851e-12	3.28175e-10	17.2004
11758924_x_at	6648	SOD2	superoxide dismutase 2	-1.04086	7.44546	-6.14157	8.82177e-06	6.42935e-05	2.73367
11758924_x_at	100129518	LOC100129518	uncharacterized LOC100129518	-1.04086	7.44546	-6.14157	8.82177e-06	6.42935e-05	2.73367
11721606_a_at	120	ADD3	adducin 3	-1.04091	9.86339	-12.3893	3.41589e-10	8.69252e-09	13.2586
11731779_a_at	85016	C11orf70	chromosome 11 open reading frame 70	-1.04099	6.75395	-12.1048	4.95651e-10	1.2008e-08	12.8724
11743472_a_at	7769	ZNF226	zinc finger protein 226	-1.04117	8.12946	-13.2816	1.10983e-10	3.28377e-09	14.4247
11728055_at	2690	GHR	growth hormone receptor	-1.0412	6.5233	-10.8704	2.71164e-09	5.3259e-08	11.1081
11732144_a_at	583	BBS2	Bardet-Biedl syndrome 2	-1.04142	8.49725	-14.3135	3.26059e-11	1.15824e-09	15.6937
11720133_a_at	5627	PROS1	protein S (alpha)	-1.04207	6.61889	-8.10348	2.18963e-07	2.5029e-06	6.55118
11757973_x_at	9397	NMT2	N-myristoyltransferase 2	-1.04245	7.88174	-14.669	2.17532e-11	8.11359e-10	16.1127
11761908_at	NA	NA	NA	-1.04292	7.93044	-5.29976	5.03612e-05	0.000298233	0.947664
11721178_a_at	5307	PITX1	paired like homeodomain 1	-1.04325	5.39394	-8.42475	1.25504e-07	1.54063e-06	7.12802
11727586_s_at	83594	NUDT12	nudix hydrolase 12	-1.04329	4.76091	-5.1844	6.43607e-05	0.000369581	0.697222
11747157_a_at	441549	CDNF	cerebral dopamine neurotrophic factor	-1.04352	4.13227	-7.18687	1.15416e-06	1.08171e-05	4.83093
11718503_a_at	56261	GPCPD1	glycerophosphocholine phosphodiesterase 1	-1.04428	8.72396	-14.3601	3.09064e-11	1.10449e-09	15.7492
11726405_a_at	443	ASPA	aspartoacylase	-1.04525	4.82406	-11.1644	1.78581e-09	3.68748e-08	11.5418
11733190_a_at	79642	ARSJ	arylsulfatase family member J	-1.04538	7.86615	-9.70143	1.55845e-08	2.46125e-07	9.29239
11750592_a_at	128553	TSHZ2	teashirt zinc finger homeobox 2	-1.04568	4.29706	-7.36542	8.27599e-07	8.06815e-06	5.17478
11737511_a_at	6672	SP100	SP100 nuclear antigen	-1.0461	8.00949	-7.55483	5.84297e-07	5.95057e-06	5.53488
11758130_s_at	50865	HEBP1	heme binding protein 1	-1.0465	10.3282	-17.1643	1.57823e-12	8.7084e-11	18.8222
11744146_x_at	5935	RBM3	RNA binding motif (RNP1, RRM) protein 3	-1.04655	11.5425	-9.75997	1.42278e-08	2.27457e-07	9.38695
11753739_a_at	1528	CYB5A	cytochrome b5 type A	-1.04658	8.85813	-14.0348	4.50505e-11	1.53672e-09	15.3589
11736532_a_at	9208	LRRFIP1	LRR binding FLII interacting protein 1	-1.04658	7.64604	-15.3549	1.01967e-11	4.22191e-10	16.8964
11763847_a_at	100134259	LINC01119	long intergenic non-protein coding RNA 1119	-1.04665	6.34718	-13.4669	8.85563e-11	2.73042e-09	14.6587
11733696_x_at	11065	UBE2C	ubiquitin conjugating enzyme E2 C	-1.04668	7.07665	-6.95457	1.79064e-06	1.58746e-05	4.3772
11745230_a_at	285343	TCAIM	T-cell activation inhibitor, mitochondrial	-1.04692	7.09881	-13.4993	8.51517e-11	2.64735e-09	14.6993
11760288_s_at	8674	VAMP4	vesicle associated membrane protein 4	-1.0473	9.47694	-11.5166	1.09453e-09	2.40772e-08	12.0501
11758683_s_at	23338	JADE2	jade family PHD finger 2	-1.04781	8.95774	-13.9066	5.23693e-11	1.74078e-09	15.203
11717347_s_at	120	ADD3	adducin 3	-1.04822	9.81227	-8.56513	9.8817e-08	1.25216e-06	7.37589
11757853_s_at	117581	TWIST2	twist family bHLH transcription factor 2	-1.04856	9.50667	-13.706	6.64346e-11	2.13796e-09	14.9565
11720266_a_at	93627	TBCK	TBC1 domain containing kinase	-1.04889	8.71416	-15.5818	7.98685e-12	3.42853e-10	17.1489
11722543_at	7220	TRPC1	transient receptor potential cation channel subfamily C member 1	-1.04943	8.71615	-13.9485	4.98465e-11	1.66925e-09	15.2542
11725726_a_at	54964	C1orf56	chromosome 1 open reading frame 56	-1.04978	6.20592	-11.5052	1.11177e-09	2.44022e-08	12.0338
11763714_a_at	23635	SSBP2	single stranded DNA binding protein 2	-1.05014	9.01912	-16.1484	4.3986e-12	2.05969e-10	17.765
11741141_x_at	23327	NEDD4L	neural precursor cell expressed, developmentally down-regulated 4-like, E3 ubiquitin protein ligase	-1.05079	3.84028	-8.85027	6.12671e-08	8.19572e-07	7.87168
11739602_a_at	332	BIRC5	baculoviral IAP repeat containing 5	-1.05195	5.15323	-8.05406	2.38812e-07	2.70729e-06	6.46127
11739889_at	8492	PRSS12	protease, serine 12	-1.05244	6.94667	-12.4063	3.34151e-10	8.53835e-09	13.2815
11733763_x_at	92949	ADAMTSL1	ADAMTS like 1	-1.05279	5.85035	-7.71558	4.36469e-07	4.60815e-06	5.83677
11727143_x_at	23136	EPB41L3	erythrocyte membrane protein band 4.1 like 3	-1.05285	7.43175	-14.0147	4.61244e-11	1.5701e-09	15.3345
11746248_x_at	54682	MANSC1	MANSC domain containing 1	-1.05344	6.04065	-13.3846	9.78698e-11	2.96092e-09	14.555
11716409_at	91461	PKDCC	protein kinase domain containing, cytoplasmic	-1.05365	7.42057	-9.23419	3.26951e-08	4.71517e-07	8.52331
11732502_a_at	130026	ICA1L	islet cell autoantigen 1 like	-1.05434	5.26419	-7.63633	5.03755e-07	5.22821e-06	5.68837
11751833_a_at	590	BCHE	butyrylcholinesterase	-1.0544	8.19937	-6.60774	3.49716e-06	2.86908e-05	3.6865
11731050_at	57562	CEP126	centrosomal protein 126	-1.05442	7.12237	-15.4676	9.02856e-12	3.79667e-10	17.0222
11742063_a_at	11119	BTN3A1	butyrophilin subfamily 3 member A1	-1.05447	4.61091	-8.88075	5.82493e-08	7.8429e-07	7.92408
11745315_a_at	8727	CTNNAL1	catenin alpha like 1	-1.05465	8.65362	-12.1901	4.43017e-10	1.09526e-08	12.9889
11729320_a_at	9655	SOCS5	suppressor of cytokine signaling 5	-1.05494	9.14945	-8.50223	1.09958e-07	1.37191e-06	7.26512
11733650_s_at	375190	FAM228B	family with sequence similarity 228 member B	-1.05559	7.51268	-12.2054	4.34212e-10	1.07726e-08	13.0097
11726189_x_at	54985	HCFC1R1	host cell factor C1 regulator 1	-1.05667	9.71258	-11.2652	1.55037e-09	3.26394e-08	11.6886
11732868_at	10160	FARP1	FERM, ARH/RhoGEF and pleckstrin domain protein 1	-1.05841	4.73867	-11.0994	1.95705e-09	3.99935e-08	11.4467
11716433_s_at	79966	SCD5	stearoyl-CoA desaturase 5	-1.05842	7.67711	-10.1801	7.48311e-09	1.30368e-07	10.0541
11718788_a_at	100	ADA	adenosine deaminase	-1.06033	7.98398	-10.281	6.43107e-09	1.14334e-07	10.2114
11740447_x_at	11119	BTN3A1	butyrophilin subfamily 3 member A1	-1.0604	7.44494	-9.58101	1.88184e-08	2.90522e-07	9.09665
11743808_a_at	1717	DHCR7	7-dehydrocholesterol reductase	-1.06241	7.51602	-10.3024	6.22904e-09	1.11222e-07	10.2445
11734045_a_at	9729	KIAA0408	KIAA0408	-1.0625	7.06719	-11.7414	8.05602e-10	1.83917e-08	12.3682
11734045_a_at	387104	SOGA3	SOGA family member 3	-1.0625	7.06719	-11.7414	8.05602e-10	1.83917e-08	12.3682
11724283_a_at	306	ANXA3	annexin A3	-1.06359	5.62738	-7.20698	1.11148e-06	1.04707e-05	4.86987
11758251_s_at	3213	HOXB3	homeobox B3	-1.06416	9.91857	-7.042	1.51652e-06	1.37168e-05	4.54881
11731693_at	3012	HIST1H2AE	histone cluster 1 H2A family member e	-1.06443	6.03893	-7.56735	5.71099e-07	5.83478e-06	5.55852
11715368_a_at	710	SERPING1	serpin family G member 1	-1.06468	9.23093	-8.68295	8.10068e-08	1.04877e-06	7.58199
11716823_s_at	56898	BDH2	3-hydroxybutyrate dehydrogenase 2	-1.06494	9.2292	-15.6351	7.54519e-12	3.26442e-10	17.2076
11755163_a_at	55120	FANCL	Fanconi anemia complementation group L	-1.06521	8.27336	-9.21576	3.36823e-08	4.84483e-07	8.49244
11740294_a_at	5592	PRKG1	protein kinase, cGMP-dependent, type I	-1.06523	7.86283	-9.32273	2.83569e-08	4.16106e-07	8.67105
11716358_s_at	9055	PRC1	protein regulator of cytokinesis 1	-1.06637	7.39259	-9.61095	1.79538e-08	2.78391e-07	9.14548
11729905_a_at	57631	LRCH2	leucine rich repeats and calponin homology domain containing 2	-1.06646	7.1154	-10.2988	6.26274e-09	1.11743e-07	10.2389
11749921_a_at	6385	SDC4	syndecan 4	-1.06724	8.25387	-10.9915	2.2807e-09	4.56647e-08	11.2878
11756756_a_at	645	BLVRB	biliverdin reductase B	-1.06773	8.90541	-14.921	1.64094e-11	6.38006e-10	16.4044
11758284_s_at	54793	KCTD9	potassium channel tetramerization domain containing 9	-1.06783	8.77523	-10.0344	9.33109e-09	1.586e-07	9.82492
11719321_a_at	7802	DNALI1	dynein axonemal light intermediate chain 1	-1.06784	6.19726	-8.22291	1.77763e-07	2.08789e-06	6.76718
11744117_at	221981	THSD7A	thrombospondin type 1 domain containing 7A	-1.06867	3.81547	-10.2956	6.29253e-09	1.12153e-07	10.234
11757736_s_at	147495	APCDD1	APC down-regulated 1	-1.06892	4.48253	-7.77358	3.93197e-07	4.20683e-06	5.94485
11758476_s_at	54796	BNC2	basonuclin 2	-1.06972	8.04773	-14.7634	1.95641e-11	7.40309e-10	16.2224
11720743_x_at	54677	CROT	carnitine O-octanoyltransferase	-1.06987	9.09931	-16.6533	2.6246e-12	1.34756e-10	18.2978
11743661_a_at	4154	MBNL1	muscleblind like splicing regulator 1	-1.07045	8.57459	-4.239	0.000503356	0.00226199	-1.38877
11730312_a_at	130872	AHSA2	activator of HSP90 ATPase homolog 2	-1.07076	7.66865	-9.81759	1.30128e-08	2.10548e-07	9.47963
11750925_a_at	9760	TOX	thymocyte selection associated high mobility group box	-1.07201	3.86327	-8.75301	7.20355e-08	9.44475e-07	7.70373
11730780_x_at	126	ADH1C	alcohol dehydrogenase 1C (class I), gamma polypeptide	-1.07227	3.63469	-8.82082	6.43381e-08	8.55336e-07	7.82095
11743093_a_at	8825	LIN7A	lin-7 homolog A, crumbs cell polarity complex component	-1.07338	4.60684	-10.1751	7.53989e-09	1.31265e-07	10.0462
11743137_a_at	4811	NID1	nidogen 1	-1.0744	7.2575	-11.8188	7.25791e-10	1.67551e-08	12.4765
11745389_x_at	60686	C14orf93	chromosome 14 open reading frame 93	-1.0747	5.96066	-11.4459	1.20641e-09	2.61661e-08	11.949
11722637_a_at	23243	ANKRD28	ankyrin repeat domain 28	-1.07525	8.05162	-12.6331	2.49668e-10	6.65088e-09	13.5839
11755935_a_at	4636	MYL5	myosin light chain 5	-1.07536	7.65174	-15.2852	1.09979e-11	4.51019e-10	16.8182
11757313_s_at	10493	VAT1	vesicle amine transport 1	-1.07542	9.02452	-11.0047	2.23806e-09	4.49564e-08	11.3074
11730313_a_at	114625	ERMAP	erythroblast membrane associated protein (Scianna blood group)	-1.07555	8.73497	-16.5476	2.92084e-12	1.47367e-10	18.1875
11716754_a_at	25941	TPGS2	tubulin polyglutamylase complex subunit 2	-1.07636	9.63625	-16.2727	3.86848e-12	1.862e-10	17.8976
11749767_a_at	51449	PCYOX1	prenylcysteine oxidase 1	-1.07672	8.19346	-15.8975	5.71541e-12	2.59051e-10	17.4946
11745292_a_at	150248	C22orf15	chromosome 22 open reading frame 15	-1.07804	5.02379	-11.9328	6.22915e-10	1.46397e-08	12.6352
11752575_a_at	81493	SYNC	syncoilin, intermediate filament protein	-1.07834	8.69874	-17.2853	1.40193e-12	7.86718e-11	18.9442
11756887_a_at	23371	TNS2	tensin 2	-1.07868	7.38203	-11.1262	1.88443e-09	3.86371e-08	11.486
11725439_at	3045	HBD	hemoglobin subunit delta	-1.07936	4.88154	-6.96744	1.74726e-06	1.55373e-05	4.40253
11756679_a_at	224	ALDH3A2	aldehyde dehydrogenase 3 family member A2	-1.08042	6.46673	-9.6477	1.69489e-08	2.64855e-07	9.20527
11734802_x_at	57146	TMEM159	transmembrane protein 159	-1.08152	9.05736	-14.7334	2.02333e-11	7.62718e-10	16.1876
11724302_a_at	8411	EEA1	early endosome antigen 1	-1.08202	5.54001	-4.52494	0.000268249	0.00130179	-0.753525
11719602_a_at	26002	MOXD1	monooxygenase DBH like 1	-1.08338	7.73111	-9.58961	1.85658e-08	2.8716e-07	9.11068
11754888_a_at	122622	ADSSL1	adenylosuccinate synthase like 1	-1.08386	6.84945	-11.6649	8.93731e-10	2.01619e-08	12.2605
11730807_x_at	11118	BTN3A2	butyrophilin subfamily 3 member A2	-1.08438	7.15182	-16.4445	3.2439e-12	1.60614e-10	18.0793
11720798_at	51762	RAB8B	RAB8B, member RAS oncogene family	-1.08512	9.41864	-11.4587	1.18529e-09	2.57873e-08	11.9674
11756502_a_at	493753	COA5	cytochrome c oxidase assembly factor 5	-1.08773	9.11691	-12.8569	1.88017e-10	5.21339e-09	13.878
11748003_a_at	10561	IFI44	interferon induced protein 44	-1.08857	6.90919	-6.51265	4.21354e-06	3.36533e-05	3.49441
11725590_a_at	11162	NUDT6	nudix hydrolase 6	-1.08951	5.00399	-6.37301	5.55227e-06	4.29122e-05	3.21017
11743570_s_at	2009	EML1	echinoderm microtubule associated protein like 1	-1.09009	8.44828	-13.1041	1.38105e-10	3.99504e-09	14.198
11750575_a_at	23414	ZFPM2	zinc finger protein, FOG family member 2	-1.09026	7.138	-13.7531	6.28118e-11	2.03327e-09	15.0146
11756334_x_at	306	ANXA3	annexin A3	-1.09026	6.42817	-9.75768	1.42784e-08	2.2812e-07	9.38326
11718021_s_at	6744	SSFA2	sperm specific antigen 2	-1.09078	11.1376	-8.59013	9.47226e-08	1.20801e-06	7.41977
11725268_s_at	79633	FAT4	FAT atypical cadherin 4	-1.09094	8.4431	-15.1422	1.2856e-11	5.16064e-10	16.6568
11741140_s_at	23327	NEDD4L	neural precursor cell expressed, developmentally down-regulated 4-like, E3 ubiquitin protein ligase	-1.09339	6.11627	-9.85862	1.22139e-08	1.99646e-07	9.5454
11744654_s_at	960	CD44	CD44 molecule (Indian blood group)	-1.09369	11.5769	-12.9889	1.59367e-10	4.52286e-09	14.0495
11756854_a_at	23301	EHBP1	EH domain binding protein 1	-1.09452	8.46119	-15.907	5.65857e-12	2.57182e-10	17.5049
11720047_a_at	51309	ARMCX1	armadillo repeat containing, X-linked 1	-1.09464	9.44003	-15.7189	6.90167e-12	3.03497e-10	17.2998
11724117_x_at	219285	SAMD9L	sterile alpha motif domain containing 9 like	-1.09569	5.40755	-6.98953	1.67532e-06	1.49892e-05	4.44595
11759416_x_at	3077	HFE	hemochromatosis	-1.09618	7.85709	-10.8547	2.77333e-09	5.42983e-08	11.0848
11720815_a_at	79870	BAALC	brain and acute leukemia, cytoplasmic	-1.09696	7.57958	-7.59882	5.39279e-07	5.54343e-06	5.61785
11759564_x_at	6187	RPS2	ribosomal protein S2	-1.09749	10.7013	-4.92125	0.000113217	0.00060804	0.121725
11759564_x_at	125208	RPS2P46	ribosomal protein S2 pseudogene 46	-1.09749	10.7013	-4.92125	0.000113217	0.00060804	0.121725
11759564_x_at	100130562	RPS2P5	ribosomal protein S2 pseudogene 5	-1.09749	10.7013	-4.92125	0.000113217	0.00060804	0.121725
11728342_at	9201	DCLK1	doublecortin like kinase 1	-1.0983	3.93527	-11.372	1.3363e-09	2.8657e-08	11.8429
11722512_a_at	3431	SP110	SP110 nuclear body protein	-1.09877	7.26082	-12.2297	4.20573e-10	1.04499e-08	13.0428
11729309_a_at	79827	CLMP	CXADR like membrane protein	-1.09898	8.46296	-6.33834	5.94831e-06	4.55604e-05	3.13923
11738268_a_at	159091	FAM122C	family with sequence similarity 122C	-1.09935	4.83517	-9.28841	2.99623e-08	4.37072e-07	8.61389
11746837_a_at	10769	PLK2	polo like kinase 2	-1.09952	5.79054	-11.9942	5.7393e-10	1.36047e-08	12.7202
11723813_at	9411	ARHGAP29	Rho GTPase activating protein 29	-1.10027	8.97421	-12.1275	4.81053e-10	1.17347e-08	12.9034
11724828_at	6364	CCL20	C-C motif chemokine ligand 20	-1.10087	4.55903	-6.75403	2.63166e-06	2.22277e-05	3.97977
11750300_a_at	11179	ZNF277	zinc finger protein 277	-1.10114	6.50236	-12.0842	5.0938e-10	1.23044e-08	12.844
11716939_a_at	3162	HMOX1	heme oxygenase 1	-1.10199	7.72269	-10.3744	5.59494e-09	1.0117e-07	10.356
11739979_a_at	445815	PALM2-AKAP2	PALM2-AKAP2 readthrough	-1.10224	9.20821	-9.64379	1.70529e-08	2.66341e-07	9.19892
11739979_a_at	11217	AKAP2	A-kinase anchoring protein 2	-1.10224	9.20821	-9.64379	1.70529e-08	2.66341e-07	9.19892
11736804_at	7594	ZNF43	zinc finger protein 43	-1.10252	4.49508	-6.47391	4.54752e-06	3.60012e-05	3.41581
11742735_a_at	51203	NUSAP1	nucleolar and spindle associated protein 1	-1.10281	4.73682	-6.2349	7.31302e-06	5.43725e-05	2.92662
11748004_a_at	9122	SLC16A4	solute carrier family 16 member 4	-1.10323	7.80669	-12.0203	5.54371e-10	1.31853e-08	12.7562
11730382_a_at	112574	SNX18	sorting nexin 18	-1.10331	8.05082	-14.1084	4.13407e-11	1.42589e-09	15.448
11717638_at	6385	SDC4	syndecan 4	-1.10412	10.7319	-15.2198	1.18104e-11	4.81117e-10	16.7445
11721223_at	8309	ACOX2	acyl-CoA oxidase 2	-1.10463	7.53613	-11.2769	1.52533e-09	3.21397e-08	11.7055
11741200_a_at	11217	AKAP2	A-kinase anchoring protein 2	-1.10469	6.50268	-5.54335	3.01507e-05	0.000189837	1.47238
11741200_a_at	445815	PALM2-AKAP2	PALM2-AKAP2 readthrough	-1.10469	6.50268	-5.54335	3.01507e-05	0.000189837	1.47238
11725103_s_at	1956	EGFR	epidermal growth factor receptor	-1.10512	8.19443	-13.3655	1.00165e-10	3.0193e-09	14.531
11723995_a_at	113263	GLCCI1	glucocorticoid induced 1	-1.10513	5.38315	-9.04341	4.4571e-08	6.21071e-07	8.20177
11729100_a_at	118491	CFAP70	cilia and flagella associated protein 70	-1.10516	4.87971	-10.2937	6.31051e-09	1.12393e-07	10.231
11721752_at	8324	FZD7	frizzled class receptor 7	-1.10577	9.20671	-14.1177	4.08987e-11	1.41459e-09	15.4591
11757631_s_at	389136	VGLL3	vestigial like family member 3	-1.1059	9.28012	-6.15301	8.62078e-06	6.29767e-05	2.75737
11764039_s_at	10982	MAPRE2	microtubule associated protein RP/EB family member 2	-1.10622	7.38833	-15.4167	9.53681e-12	3.99293e-10	16.9656
11725240_at	64108	RTP4	receptor transporter protein 4	-1.10699	4.69726	-8.33081	1.47484e-07	1.77749e-06	6.96072
11754061_x_at	10581	IFITM2	interferon induced transmembrane protein 2	-1.10709	10.7835	-13.4643	8.88417e-11	2.73546e-09	14.6553
11723464_s_at	10659	CELF2	CUGBP Elav-like family member 2	-1.10768	9.5188	-10.9758	2.33219e-09	4.66203e-08	11.2646
11733216_s_at	54532	USP53	ubiquitin specific peptidase 53	-1.10793	8.15758	-11.5057	1.11096e-09	2.43952e-08	12.0346
11716793_a_at	9133	CCNB2	cyclin B2	-1.10872	6.44106	-7.70237	4.46993e-07	4.70923e-06	5.8121
11721242_s_at	2222	FDFT1	farnesyl-diphosphate farnesyltransferase 1	-1.10927	10.8387	-14.0061	4.65901e-11	1.58169e-09	15.3241
11758048_s_at	7068	THRB	thyroid hormone receptor beta	-1.10953	6.02162	-7.22846	1.06771e-06	1.01103e-05	4.9114
11717639_x_at	6385	SDC4	syndecan 4	-1.10966	10.6679	-16.1885	4.21945e-12	1.99492e-10	17.8079
11755417_a_at	23240	KIAA0922	KIAA0922	-1.11149	6.92835	-13.9746	4.83417e-11	1.63322e-09	15.2859
11727214_a_at	56986	DTWD1	DTW domain containing 1	-1.11208	9.27866	-8.62871	8.87484e-08	1.13798e-06	7.48733
11741256_s_at	200316	APOBEC3F	apolipoprotein B mRNA editing enzyme catalytic subunit 3F	-1.113	3.72044	-6.1145	9.31706e-06	6.75774e-05	2.6775
11758337_s_at	100	ADA	adenosine deaminase	-1.11405	7.75514	-15.5037	8.6847e-12	3.68022e-10	17.0623
11727141_s_at	23136	EPB41L3	erythrocyte membrane protein band 4.1 like 3	-1.11446	9.26981	-13.039	1.49713e-10	4.28823e-09	14.1143
11756479_x_at	8635	RNASET2	ribonuclease T2	-1.11553	7.93494	-17.5878	1.04602e-12	6.09809e-11	19.2458
11715568_a_at	928	CD9	CD9 molecule	-1.1161	11.5602	-9.59379	1.84443e-08	2.85501e-07	9.1175
11757956_s_at	56952	PRTFDC1	phosphoribosyl transferase domain containing 1	-1.11626	8.38265	-13.3591	1.00952e-10	3.03747e-09	14.5229
11720704_s_at	7164	TPD52L1	tumor protein D52 like 1	-1.11629	9.15683	-14.3992	2.95514e-11	1.06143e-09	15.7956
11720098_a_at	80321	CEP70	centrosomal protein 70	-1.11803	6.57159	-12.3158	3.75825e-10	9.45195e-09	13.1595
11717773_a_at	7067	THRA	thyroid hormone receptor, alpha	-1.11878	9.41672	-18.815	3.33285e-13	2.34915e-11	20.4217
11716212_a_at	11112	HIBADH	3-hydroxyisobutyrate dehydrogenase	-1.11911	8.85347	-15.1428	1.2848e-11	5.16064e-10	16.6574
11761914_a_at	3140	MR1	major histocompatibility complex, class I-related	-1.12012	6.97316	-14.6356	2.25876e-11	8.37434e-10	16.0737
11732259_at	63898	SH2D4A	SH2 domain containing 4A	-1.12017	9.40644	-14.8838	1.71023e-11	6.62866e-10	16.3616
11754397_at	644538	SMIM10	small integral membrane protein 10	-1.12059	5.67716	-9.22997	3.29184e-08	4.74184e-07	8.51624
11718427_s_at	84263	HSDL2	hydroxysteroid dehydrogenase like 2	-1.12072	7.38904	-14.8492	1.77748e-11	6.85175e-10	16.3217
11745671_a_at	56776	FMN2	formin 2	-1.1215	4.36453	-12.1946	4.40403e-10	1.08934e-08	12.995
11729422_a_at	64208	POPDC3	popeye domain containing 3	-1.12225	7.56603	-13.4803	8.71349e-11	2.69378e-09	14.6754
11736001_s_at	1634	DCN	decorin	-1.12234	13.0288	-16.927	1.99544e-12	1.06542e-10	18.5804
11724721_a_at	79695	GALNT12	polypeptide N-acetylgalactosaminyltransferase 12	-1.12265	5.35683	-8.88644	5.77035e-08	7.77576e-07	7.93385
11743938_at	57709	SLC7A14	solute carrier family 7 member 14	-1.12313	3.44715	-8.54793	1.01742e-07	1.28168e-06	7.34564
11716913_a_at	57509	MTUS1	microtubule associated scaffold protein 1	-1.124	7.18825	-13.7553	6.2644e-11	2.03162e-09	15.0174
11741762_x_at	60686	C14orf93	chromosome 14 open reading frame 93	-1.1243	5.94259	-11.3376	1.40167e-09	2.99292e-08	11.7933
11757407_x_at	2192	FBLN1	fibulin 1	-1.12451	7.22724	-13.1322	1.33384e-10	3.86751e-09	14.234
11756952_a_at	7086	TKT	transketolase	-1.1261	9.89332	-11.8872	6.62025e-10	1.54197e-08	12.572
11734815_a_at	83445	GSG1	germ cell associated 1	-1.127	4.95578	-6.38056	5.46972e-06	4.23469e-05	3.2256
11730602_at	200316	APOBEC3F	apolipoprotein B mRNA editing enzyme catalytic subunit 3F	-1.12758	5.82049	-10.0892	8.58586e-09	1.4735e-07	9.91135
11743564_x_at	79649	MAP7D3	MAP7 domain containing 3	-1.12838	5.7341	-8.12148	2.12165e-07	2.43419e-06	6.58386
11717659_at	135228	CD109	CD109 molecule	-1.12903	5.66717	-13.4414	9.13391e-11	2.79754e-09	14.6266
11715464_x_at	3487	IGFBP4	insulin like growth factor binding protein 4	-1.12908	8.04341	-8.39111	1.32953e-07	1.61962e-06	7.06824
11721169_a_at	29108	PYCARD	PYD and CARD domain containing	-1.13009	8.44086	-15.1322	1.29987e-11	5.20721e-10	16.6454
11719519_at	9037	SEMA5A	semaphorin 5A	-1.13057	5.19302	-10.4145	5.27173e-09	9.60031e-08	10.4178
11720570_a_at	23338	JADE2	jade family PHD finger 2	-1.13099	7.17608	-10.7288	3.32618e-09	6.39088e-08	10.896
11735110_at	26273	FBXO3	F-box protein 3	-1.13109	4.46571	-7.25511	1.01587e-06	9.66935e-06	4.96285
11724782_x_at	26091	HERC4	HECT and RLD domain containing E3 ubiquitin protein ligase 4	-1.1313	9.23027	-10.4269	5.17635e-09	9.46098e-08	10.4368
11755208_a_at	1774	DNASE1L1	deoxyribonuclease 1 like 1	-1.13151	7.24873	-15.3115	1.0688e-11	4.39939e-10	16.8477
11757868_a_at	113791	PIK3IP1	phosphoinositide-3-kinase interacting protein 1	-1.13168	9.1367	-12.4291	3.24468e-10	8.34262e-09	13.312
11758170_s_at	1730	DIAPH2	diaphanous related formin 2	-1.13229	5.73654	-8.41417	1.278e-07	1.56533e-06	7.10922
11723939_a_at	891	CCNB1	cyclin B1	-1.13236	7.10839	-8.12153	2.12144e-07	2.43419e-06	6.58396
11758571_s_at	23327	NEDD4L	neural precursor cell expressed, developmentally down-regulated 4-like, E3 ubiquitin protein ligase	-1.1324	5.99229	-9.6813	1.60816e-08	2.52927e-07	9.2598
11749014_a_at	6405	SEMA3F	semaphorin 3F	-1.13255	5.67226	-7.12307	1.30119e-06	1.20198e-05	4.70702
11732004_a_at	161823	ADAL	adenosine deaminase like	-1.13256	6.01907	-10.1565	7.75423e-09	1.34523e-07	10.0171
11743922_at	55190	NUDT11	nudix hydrolase 11	-1.13399	7.40208	-13.15	1.3048e-10	3.79441e-09	14.2569
11731881_a_at	5519	PPP2R1B	protein phosphatase 2 scaffold subunit Abeta	-1.13437	6.72466	-8.94831	5.21007e-08	7.11906e-07	8.03981
11720452_at	130271	PLEKHH2	pleckstrin homology, MyTH4 and FERM domain containing H2	-1.13437	7.80484	-15.0298	1.45472e-11	5.74175e-10	16.529
11741911_a_at	2635	GBP3	guanylate binding protein 3	-1.13494	8.51356	-14.1269	4.04637e-11	1.4015e-09	15.4702
11745231_a_at	285343	TCAIM	T-cell activation inhibitor, mitochondrial	-1.13518	8.01913	-13.3151	1.06525e-10	3.17236e-09	14.4672
11730623_at	92126	DSEL	dermatan sulfate epimerase-like	-1.13537	9.38506	-9.64765	1.69503e-08	2.64855e-07	9.20519
11728476_a_at	2921	CXCL3	C-X-C motif chemokine ligand 3	-1.13555	3.9068	-5.964	1.26448e-05	8.84727e-05	2.36362
11738121_a_at	112574	SNX18	sorting nexin 18	-1.13586	6.91438	-9.92105	1.10957e-08	1.84482e-07	9.64509
11752626_a_at	5087	PBX1	PBX homeobox 1	-1.13618	9.26446	-13.8235	5.77725e-11	1.89164e-09	15.1013
11718190_s_at	80017	C14orf159	chromosome 14 open reading frame 159	-1.13657	6.63718	-13.1121	1.36733e-10	3.95998e-09	14.2083
11725806_at	3764	KCNJ8	potassium voltage-gated channel subfamily J member 8	-1.13686	6.19953	-10.2776	6.46428e-09	1.14822e-07	10.206
11757605_s_at	54566	EPB41L4B	erythrocyte membrane protein band 4.1 like 4B	-1.13723	4.37455	-6.66492	3.12822e-06	2.59393e-05	3.80146
11718816_a_at	5333	PLCD1	phospholipase C delta 1	-1.13833	7.9856	-16.7165	2.46286e-12	1.2751e-10	18.3634
11722514_a_at	414328	IDNK	IDNK, gluconokinase	-1.13934	6.09639	-7.52709	6.14673e-07	6.22661e-06	5.48244
11729906_x_at	57631	LRCH2	leucine rich repeats and calponin homology domain containing 2	-1.13949	7.37631	-14.0357	4.50046e-11	1.53621e-09	15.36
11754928_x_at	26509	MYOF	myoferlin	-1.14082	11.4853	-19.3641	2.04185e-13	1.56927e-11	20.9245
11741490_a_at	9208	LRRFIP1	LRR binding FLII interacting protein 1	-1.14158	6.92869	-17.1556	1.59176e-12	8.75382e-11	18.8134
11734161_a_at	79800	CARF	calcium responsive transcription factor	-1.14206	4.21842	-6.24695	7.1386e-06	5.32838e-05	2.95146
11738250_at	1111	CHEK1	checkpoint kinase 1	-1.14207	7.78588	-13.3688	9.9766e-11	3.00909e-09	14.5351
11751185_a_at	4088	SMAD3	SMAD family member 3	-1.14246	5.94833	-11.223	1.64474e-09	3.43923e-08	11.6272
11731150_at	643866	CBLN3	cerebellin 3 precursor	-1.14261	6.57025	-8.00992	2.58131e-07	2.90302e-06	6.38069
11756954_s_at	9839	ZEB2	zinc finger E-box binding homeobox 2	-1.14336	8.62816	-5.4053	4.02898e-05	0.000245282	1.17573
11752840_a_at	22936	ELL2	elongation factor for RNA polymerase II 2	-1.14353	8.60867	-13.458	8.95226e-11	2.75212e-09	14.6474
11748728_a_at	8555	CDC14B	cell division cycle 14B	-1.14354	6.60092	-10.3728	5.60907e-09	1.01358e-07	10.3534
11717691_a_at	88455	ANKRD13A	ankyrin repeat domain 13A	-1.14467	10.6335	-15.0177	1.4744e-11	5.80904e-10	16.5151
11731413_at	130589	GALM	galactose mutarotase	-1.14508	6.8232	-13.5288	8.21716e-11	2.56922e-09	14.7362
11736424_a_at	134429	STARD4	StAR related lipid transfer domain containing 4	-1.14534	5.61826	-5.49158	3.36047e-05	0.000208848	1.36135
11720305_a_at	10493	VAT1	vesicle amine transport 1	-1.14569	6.36401	-7.16638	1.19941e-06	1.11924e-05	4.79119
11724385_a_at	219844	HYLS1	HYLS1, centriolar and ciliogenesis associated	-1.14587	6.87617	-14.2271	3.60241e-11	1.26186e-09	15.5905
11746862_x_at	79642	ARSJ	arylsulfatase family member J	-1.14654	8.30301	-9.77109	1.39843e-08	2.24506e-07	9.40487
11754949_s_at	27129	HSPB7	heat shock protein family B (small) member 7	-1.14684	7.81586	-12.6851	2.33661e-10	6.29906e-09	13.6526
11729387_x_at	6160	RPL31	ribosomal protein L31	-1.14693	7.98169	-8.99119	4.85537e-08	6.69965e-07	8.11297
11717803_a_at	59277	NTN4	netrin 4	-1.14736	7.18845	-9.39177	2.53943e-08	3.77558e-07	8.78558
11730465_at	3759	KCNJ2	potassium voltage-gated channel subfamily J member 2	-1.14759	5.92662	-9.89766	1.15016e-08	1.90137e-07	9.60779
11753740_x_at	1528	CYB5A	cytochrome b5 type A	-1.14799	9.13571	-18.7817	3.43494e-13	2.40283e-11	20.3907
11758897_at	27350	APOBEC3C	apolipoprotein B mRNA editing enzyme catalytic subunit 3C	-1.14849	9.26058	-14.8446	1.78667e-11	6.86369e-10	16.3163
11745380_a_at	9481	SLC25A27	solute carrier family 25 member 27	-1.14851	4.52271	-6.79537	2.42977e-06	2.0767e-05	4.06213
11744743_a_at	10194	TSHZ1	teashirt zinc finger homeobox 1	-1.14929	7.86982	-12.3639	3.53069e-10	8.95263e-09	13.2244
11751057_a_at	63898	SH2D4A	SH2 domain containing 4A	-1.14971	8.35731	-15.7909	6.39466e-12	2.85138e-10	17.3786
11757595_x_at	1382	CRABP2	cellular retinoic acid binding protein 2	-1.15263	7.10723	-15.0785	1.37884e-11	5.48597e-10	16.5844
11727044_a_at	340061	TMEM173	transmembrane protein 173	-1.15287	7.2797	-13.1744	1.26613e-10	3.69417e-09	14.2881
11730504_at	9509	ADAMTS2	ADAM metallopeptidase with thrombospondin type 1 motif 2	-1.15332	7.40249	-12.8092	1.99675e-10	5.48138e-09	13.8156
11721602_a_at	171024	SYNPO2	synaptopodin 2	-1.15344	5.46611	-10.6573	3.69017e-09	7.0194e-08	10.7882
11728603_a_at	137075	CLDN23	claudin 23	-1.15377	5.30023	-13.0015	1.56875e-10	4.46494e-09	14.0658
11721889_a_at	440498	HSBP1L1	heat shock factor binding protein 1 like 1	-1.15404	8.38842	-16.8091	2.24441e-12	1.17552e-10	18.4592
11756684_a_at	83657	DYNLRB2	dynein light chain roadblock-type 2	-1.15408	4.09051	-10.6281	3.85077e-09	7.27736e-08	10.7439
11742846_a_at	8450	CUL4B	cullin 4B	-1.15448	9.10128	-13.4365	9.18829e-11	2.81072e-09	14.6204
11718241_a_at	158471	PRUNE2	prune homolog 2	-1.155	8.9926	-17.6803	9.57235e-13	5.68768e-11	19.3371
11748756_x_at	4212	MEIS2	Meis homeobox 2	-1.15543	6.69682	-13.9372	5.05173e-11	1.68643e-09	15.2403
11742723_a_at	6778	STAT6	signal transducer and activator of transcription 6	-1.15584	9.55043	-18.1444	6.17275e-13	3.927e-11	19.7884
11744434_a_at	83666	PARP9	poly(ADP-ribose) polymerase family member 9	-1.15605	8.47229	-9.61726	1.77768e-08	2.75906e-07	9.15576
11747232_a_at	121512	FGD4	FYVE, RhoGEF and PH domain containing 4	-1.15769	4.51504	-9.02037	4.62841e-08	6.4205e-07	8.16264
11719410_s_at	28996	HIPK2	homeodomain interacting protein kinase 2	-1.15795	9.93885	-14.8319	1.81219e-11	6.94228e-10	16.3017
11757924_s_at	57568	SIPA1L2	signal induced proliferation associated 1 like 2	-1.15915	7.11192	-18.3277	5.20506e-13	3.39874e-11	19.9637
11728717_at	6374	CXCL5	C-X-C motif chemokine ligand 5	-1.15936	3.7519	-7.76787	3.9725e-07	4.2448e-06	5.93424
11757701_s_at	8674	VAMP4	vesicle associated membrane protein 4	-1.16044	8.09813	-10.4234	5.20287e-09	9.49542e-08	10.4315
11757383_a_at	1512	CTSH	cathepsin H	-1.16047	5.68921	-12.9936	1.58424e-10	4.50126e-09	14.0556
11735902_a_at	627	BDNF	brain derived neurotrophic factor	-1.16104	9.06244	-11.6641	8.9474e-10	2.01689e-08	12.2593
11721997_s_at	54625	PARP14	poly(ADP-ribose) polymerase family member 14	-1.16155	8.52721	-11.312	1.45252e-09	3.08642e-08	11.7563
11720794_a_at	8406	SRPX	sushi repeat containing protein, X-linked	-1.16193	8.96106	-12.591	2.63447e-10	6.9506e-09	13.5281
11731341_a_at	79841	AGBL2	ATP/GTP binding protein like 2	-1.16255	3.7983	-7.36621	8.26394e-07	8.06127e-06	5.17628
11721624_s_at	26118	WSB1	WD repeat and SOCS box containing 1	-1.16287	11.4183	-13.9122	5.20227e-11	1.73042e-09	15.2099
11734947_a_at	2252	FGF7	fibroblast growth factor 7	-1.16422	9.60891	-11.3197	1.437e-09	3.05779e-08	11.7674
11727538_at	8382	NME5	NME/NM23 family member 5	-1.16486	6.09251	-13.6168	7.39242e-11	2.34694e-09	14.8458
11732147_a_at	847	CAT	catalase	-1.1655	7.79205	-12.1482	4.68086e-10	1.14804e-08	12.9317
11723213_a_at	4208	MEF2C	myocyte enhancer factor 2C	-1.16561	5.41392	-12.0648	5.22565e-10	1.25555e-08	12.8175
11717823_s_at	7127	TNFAIP2	TNF alpha induced protein 2	-1.16707	7.14066	-14.7804	1.91938e-11	7.29645e-10	16.2422
11718608_at	7318	UBA7	ubiquitin like modifier activating enzyme 7	-1.16739	6.95612	-10.6686	3.62988e-09	6.9127e-08	10.8053
11719883_a_at	81575	APOLD1	apolipoprotein L domain containing 1	-1.16751	5.79546	-12.2347	4.17838e-10	1.04029e-08	13.0496
11719691_x_at	57045	TWSG1	twisted gastrulation BMP signaling modulator 1	-1.16788	10.4647	-5.95355	1.29174e-05	9.01248e-05	2.34172
11719646_a_at	23301	EHBP1	EH domain binding protein 1	-1.16807	10.6874	-20.4881	7.78302e-14	6.88956e-12	21.9121
11718515_a_at	58472	SQOR	sulfide quinone oxidoreductase	-1.16808	9.03692	-18.6465	3.88371e-13	2.6587e-11	20.2646
11725280_a_at	56978	PRDM8	PR/SET domain 8	-1.16866	8.1399	-9.84137	1.25433e-08	2.03952e-07	9.51777
11739681_x_at	196	AHR	aryl hydrocarbon receptor	-1.16877	9.65966	-7.86571	3.33412e-07	3.63565e-06	6.11563
11748650_a_at	80332	ADAM33	ADAM metallopeptidase domain 33	-1.16919	7.41542	-15.2298	1.1682e-11	4.766e-10	16.7558
11737871_a_at	23671	TMEFF2	transmembrane protein with EGF like and two follistatin like domains 2	-1.16929	5.96855	-8.84321	6.19889e-08	8.28555e-07	7.85953
11755605_s_at	378938	MALAT1	metastasis associated lung adenocarcinoma transcript 1 (non-protein coding)	-1.16937	11.8642	-8.17487	1.93269e-07	2.24814e-06	6.68051
11745032_a_at	79642	ARSJ	arylsulfatase family member J	-1.16964	7.44133	-13.2333	1.17759e-10	3.45699e-09	14.3632
11744969_a_at	89932	PAPLN	papilin, proteoglycan like sulfated glycoprotein	-1.17007	6.03764	-9.85838	1.22185e-08	1.99656e-07	9.54501
11758898_x_at	27350	APOBEC3C	apolipoprotein B mRNA editing enzyme catalytic subunit 3C	-1.17064	8.85947	-17.7161	9.25033e-13	5.52286e-11	19.3723
11733089_at	11179	ZNF277	zinc finger protein 277	-1.17141	8.37269	-12.7925	2.0391e-10	5.58524e-09	13.7939
11755945_a_at	219539	YPEL4	yippee like 4	-1.17164	6.21062	-11.8744	6.73503e-10	1.5665e-08	12.5541
11724919_a_at	7923	HSD17B8	hydroxysteroid 17-beta dehydrogenase 8	-1.17229	6.60269	-13.2699	1.12584e-10	3.32083e-09	14.4098
11751700_a_at	3776	KCNK2	potassium two pore domain channel subfamily K member 2	-1.1723	4.00078	-7.59992	5.38206e-07	5.53526e-06	5.61991
11726885_s_at	84529	C15orf41	chromosome 15 open reading frame 41	-1.17231	7.58999	-13.9923	4.73479e-11	1.60293e-09	15.3074
11740481_x_at	54852	PAQR5	progestin and adipoQ receptor family member 5	-1.17302	4.25551	-8.37476	1.3674e-07	1.66181e-06	7.03912
11747505_a_at	80321	CEP70	centrosomal protein 70	-1.17313	6.79245	-9.3746	2.60993e-08	3.87342e-07	8.75715
11720262_a_at	4286	MITF	melanogenesis associated transcription factor	-1.17319	7.34452	-11.5415	1.05771e-09	2.33919e-08	12.0856
11734179_a_at	5737	PTGFR	prostaglandin F receptor	-1.17334	6.43301	-7.69604	4.52133e-07	4.75628e-06	5.80027
11722739_a_at	11190	CEP250	centrosomal protein 250	-1.17345	6.84947	-15.6495	7.4302e-12	3.22029e-10	17.2235
11762907_at	NA	NA	NA	-1.17365	7.53956	-10.5761	4.15526e-09	7.78444e-08	10.6649
11719690_at	57045	TWSG1	twisted gastrulation BMP signaling modulator 1	-1.17492	10.2793	-5.9832	1.21597e-05	8.54504e-05	2.40381
11734966_x_at	4776	NFATC4	nuclear factor of activated T-cells 4	-1.17516	8.51204	-15.3845	9.87544e-12	4.10744e-10	16.9295
11739541_a_at	5295	PIK3R1	phosphoinositide-3-kinase regulatory subunit 1	-1.17528	5.73488	-10.938	2.46157e-09	4.88906e-08	11.2086
11719147_at	81558	FAM117A	family with sequence similarity 117 member A	-1.1756	5.32806	-11.1959	1.7084e-09	3.55432e-08	11.5878
11719409_a_at	28996	HIPK2	homeodomain interacting protein kinase 2	-1.1765	9.32093	-14.7069	2.08442e-11	7.82172e-10	16.1569
11719659_x_at	477	ATP1A2	ATPase Na+/K+ transporting subunit alpha 2	-1.17669	5.68359	-9.97913	1.01514e-08	1.70551e-07	9.73744
11720721_s_at	22800	RRAS2	related RAS viral (r-ras) oncogene homolog 2	-1.17675	9.92433	-12.2044	4.34795e-10	1.07817e-08	13.0083
11715915_a_at	960	CD44	CD44 molecule (Indian blood group)	-1.17717	8.77204	-11.0549	2.08432e-09	4.21935e-08	11.3813
11725512_a_at	55089	SLC38A4	solute carrier family 38 member 4	-1.17724	6.86337	-12.217	4.27628e-10	1.06199e-08	13.0255
11732287_at	9666	DZIP3	DAZ interacting zinc finger protein 3	-1.1779	7.92839	-16.5582	2.88958e-12	1.46386e-10	18.1986
11754306_a_at	56922	MCCC1	methylcrotonoyl-CoA carboxylase 1	-1.17799	7.65561	-13.1926	1.23796e-10	3.62132e-09	14.3114
11737771_a_at	11142	PKIG	cAMP-dependent protein kinase inhibitor gamma	-1.17802	8.26984	-16.4751	3.14432e-12	1.5641e-10	18.1114
11739458_at	81493	SYNC	syncoilin, intermediate filament protein	-1.17845	9.47577	-13.5414	8.09373e-11	2.53544e-09	14.7519
11740606_a_at	123688	HYKK	hydroxylysine kinase	-1.17928	5.1859	-9.72114	1.51132e-08	2.39752e-07	9.32428
11725627_at	57185	NIPAL3	NIPA like domain containing 3	-1.17976	10.1571	-20.0484	1.12829e-13	9.57887e-12	21.5322
11741136_x_at	1123	CHN1	chimerin 1	-1.17996	6.88411	-19.1578	2.45088e-13	1.82966e-11	20.7372
11728306_s_at	51454	GULP1	GULP, engulfment adaptor PTB domain containing 1	-1.18008	7.81862	-9.60145	1.82237e-08	2.82311e-07	9.12999
11724625_a_at	55812	SPATA7	spermatogenesis associated 7	-1.18033	6.61328	-9.10499	4.03099e-08	5.6874e-07	8.30604
11753952_a_at	2592	GALT	galactose-1-phosphate uridylyltransferase	-1.1809	7.46005	-17.6201	1.014e-12	5.97477e-11	19.2778
11747255_a_at	4211	MEIS1	Meis homeobox 1	-1.18181	8.30271	-10.5965	4.03304e-09	7.58416e-08	10.6959
11751260_a_at	6422	SFRP1	secreted frizzled related protein 1	-1.18199	6.12345	-7.24061	1.04376e-06	9.91382e-06	4.93485
11718452_at	8313	AXIN2	axin 2	-1.18205	4.8303	-13.1378	1.32456e-10	3.84287e-09	14.2413
11725443_at	56849	TCEAL7	transcription elongation factor A like 7	-1.18221	6.90749	-15.4325	9.37658e-12	3.933e-10	16.9831
11740603_a_at	83464	APH1B	aph-1 homolog B, gamma-secretase subunit	-1.18245	7.30198	-19.8071	1.38785e-13	1.14105e-11	21.3201
11728921_at	83992	CTTNBP2	cortactin binding protein 2	-1.18296	6.85121	-6.62188	3.4019e-06	2.79882e-05	3.71498
11749754_a_at	1915	EEF1A1	eukaryotic translation elongation factor 1 alpha 1	-1.18408	5.51824	-6.44852	4.78124e-06	3.76408e-05	3.36417
11742904_s_at	9532	BAG2	BCL2 associated athanogene 2	-1.18532	9.68887	-12.5673	2.71575e-10	7.11531e-09	13.4966
11758625_s_at	2941	GSTA4	glutathione S-transferase alpha 4	-1.18537	9.00838	-13.7006	6.68684e-11	2.14773e-09	14.9498
11742698_at	6447	SCG5	secretogranin V	-1.18737	8.06308	-11.3104	1.45564e-09	3.08816e-08	11.7541
11744277_x_at	822	CAPG	capping actin protein, gelsolin like	-1.18781	8.01924	-15.5385	8.36651e-12	3.56983e-10	17.1009
11755291_a_at	79961	DENND2D	DENN domain containing 2D	-1.18877	5.30719	-8.34771	1.43251e-07	1.73186e-06	6.9909
11722154_a_at	166929	SGMS2	sphingomyelin synthase 2	-1.18909	6.43252	-10.998	2.25958e-09	4.53335e-08	11.2975
11716987_a_at	3157	HMGCS1	3-hydroxy-3-methylglutaryl-CoA synthase 1	-1.18912	7.30059	-8.62804	8.88488e-08	1.13868e-06	7.48616
11719487_a_at	3914	LAMB3	laminin subunit beta 3	-1.18925	5.19911	-11.3248	1.42685e-09	3.04012e-08	11.7748
11716055_s_at	50861	STMN3	stathmin 3	-1.18991	8.00035	-13.831	5.72636e-11	1.87949e-09	15.1104
11729280_a_at	84142	FAM175A	family with sequence similarity 175 member A	-1.19032	7.50678	-15.6788	7.20175e-12	3.14608e-10	17.2558
11757283_s_at	1634	DCN	decorin	-1.1918	12.1034	-8.40267	1.30343e-07	1.59056e-06	7.0888
11733018_s_at	5295	PIK3R1	phosphoinositide-3-kinase regulatory subunit 1	-1.19303	7.32265	-10.4164	5.25702e-09	9.58366e-08	10.4207
11728978_x_at	841	CASP8	caspase 8	-1.19338	6.85389	-8.69935	7.88077e-08	1.02404e-06	7.61053
11754719_x_at	10742	RAI2	retinoic acid induced 2	-1.19412	5.50046	-10.4547	4.96757e-09	9.10967e-08	10.4795
11727189_x_at	7474	WNT5A	Wnt family member 5A	-1.19468	9.93355	-8.3788	1.35793e-07	1.65218e-06	7.04633
11743850_at	5156	PDGFRA	platelet derived growth factor receptor alpha	-1.19507	11.2627	-19.4149	1.95258e-13	1.51478e-11	20.9703
11721598_a_at	10278	EFS	embryonal Fyn-associated substrate	-1.19523	6.31799	-18.019	6.94282e-13	4.33335e-11	19.6675
11746634_a_at	26586	CKAP2	cytoskeleton associated protein 2	-1.19554	4.66836	-5.50172	3.28975e-05	0.000204804	1.38312
11745989_a_at	3108	HLA-DMA	major histocompatibility complex, class II, DM alpha	-1.19708	6.32652	-11.7085	8.42346e-10	1.91247e-08	12.3219
11721840_at	11010	GLIPR1	GLI pathogenesis related 1	-1.1973	10.6615	-9.09985	4.06488e-08	5.7303e-07	8.29735
11719302_a_at	5836	PYGL	glycogen phosphorylase L	-1.19744	8.66669	-15.3913	9.803e-12	4.08417e-10	16.9371
11753953_x_at	79411	GLB1L	galactosidase beta 1 like	-1.19824	5.92469	-12.9061	1.76755e-10	4.92594e-09	13.9421
11722573_a_at	64167	ERAP2	endoplasmic reticulum aminopeptidase 2	-1.19912	7.31098	-7.20298	1.11984e-06	1.05334e-05	4.86212
11720695_at	79630	C1orf54	chromosome 1 open reading frame 54	-1.19919	8.54803	-13.6681	6.95124e-11	2.22543e-09	14.9096
11724984_a_at	23086	EXPH5	exophilin 5	-1.19942	4.95101	-7.96309	2.80415e-07	3.12382e-06	6.29492
11738542_a_at	8710	SERPINB7	serpin family B member 7	-1.19991	7.6276	-7.40702	7.66362e-07	7.556e-06	5.25428
11740173_a_at	9655	SOCS5	suppressor of cytokine signaling 5	-1.20043	8.91995	-7.44523	7.14266e-07	7.10891e-06	5.3271
11731544_at	23235	SIK2	salt inducible kinase 2	-1.2012	7.39939	-12.5485	2.78202e-10	7.27013e-09	13.4716
11759766_at	3140	MR1	major histocompatibility complex, class I-related	-1.20141	7.54928	-17.9918	7.12275e-13	4.44006e-11	19.6412
11741350_a_at	311	ANXA11	annexin A11	-1.20163	11.4859	-19.429	1.92853e-13	1.49847e-11	20.983
11752913_a_at	143686	SESN3	sestrin 3	-1.20387	4.08037	-7.6794	4.65945e-07	4.87981e-06	5.76912
11718868_a_at	54873	PALMD	palmdelphin	-1.20424	4.05362	-12.5003	2.95962e-10	7.6775e-09	13.4074
11750541_a_at	6744	SSFA2	sperm specific antigen 2	-1.20483	8.6376	-16.3342	3.63154e-12	1.75702e-10	17.9628
11725198_at	3552	IL1A	interleukin 1 alpha	-1.20558	4.26459	-8.26602	1.64955e-07	1.96166e-06	6.84468
11717348_a_at	120	ADD3	adducin 3	-1.20561	9.67655	-9.56999	1.91477e-08	2.94963e-07	9.07864
11746149_x_at	590	BCHE	butyrylcholinesterase	-1.20628	7.9245	-6.01933	1.1298e-05	8.00336e-05	2.47933
11740170_s_at	143872	ARHGAP42	Rho GTPase activating protein 42	-1.20687	4.98224	-11.2147	1.66394e-09	3.47644e-08	11.6152
11756867_a_at	10673	TNFSF13B	TNF superfamily member 13b	-1.20797	5.51346	-9.71307	1.53043e-08	2.42086e-07	9.31123
11749792_a_at	5087	PBX1	PBX homeobox 1	-1.20804	6.64205	-13.6865	6.7999e-11	2.1798e-09	14.9324
11759498_at	81553	FAM49A	family with sequence similarity 49 member A	-1.20812	5.70921	-7.20601	1.11351e-06	1.04838e-05	4.86799
11759062_s_at	23235	SIK2	salt inducible kinase 2	-1.2093	9.35959	-13.9511	4.96945e-11	1.66755e-09	15.2573
11743036_s_at	6303	SAT1	spermidine/spermine N1-acetyltransferase 1	-1.20969	10.6619	-11.1339	1.86414e-09	3.83482e-08	11.4972
11740390_a_at	54502	RBM47	RNA binding motif protein 47	-1.20994	4.20383	-8.63941	8.71619e-08	1.11909e-06	7.50604
11750740_a_at	8869	ST3GAL5	ST3 beta-galactoside alpha-2,3-sialyltransferase 5	-1.21033	7.3587	-10.0804	8.70085e-09	1.49117e-07	9.89753
11728670_a_at	7328	UBE2H	ubiquitin conjugating enzyme E2 H	-1.21287	7.38173	-8.32374	1.49292e-07	1.79567e-06	6.94809
11729279_x_at	84142	FAM175A	family with sequence similarity 175 member A	-1.2131	6.96399	-11.1292	1.87655e-09	3.85394e-08	11.4903
11746430_a_at	9194	SLC16A7	solute carrier family 16 member 7	-1.21338	6.33827	-7.08787	1.39049e-06	1.27142e-05	4.63844
11745050_a_at	214	ALCAM	activated leukocyte cell adhesion molecule	-1.21361	5.41099	-8.15247	2.00973e-07	2.3241e-06	6.64001
11726190_a_at	9732	DOCK4	dedicator of cytokinesis 4	-1.2141	8.8534	-14.3911	2.98263e-11	1.06897e-09	15.786
11749660_a_at	4343	MOV10	Mov10 RISC complex RNA helicase	-1.21506	6.73351	-13.5196	8.30955e-11	2.59483e-09	14.7246
11721988_at	57577	CCDC191	coiled-coil domain containing 191	-1.21641	6.68375	-12.8154	1.98109e-10	5.44744e-09	13.8238
11744720_a_at	83445	GSG1	germ cell associated 1	-1.21752	5.06545	-8.84212	6.21009e-08	8.29829e-07	7.85766
11738200_a_at	79839	CCDC102B	coiled-coil domain containing 102B	-1.21817	4.38495	-10.033	9.34997e-09	1.58811e-07	9.82282
11729076_x_at	4056	LTC4S	leukotriene C4 synthase	-1.21823	5.49959	-11.5257	1.08098e-09	2.3811e-08	12.063
11755335_a_at	81563	C1orf21	chromosome 1 open reading frame 21	-1.21887	8.87206	-13.3384	1.03538e-10	3.10134e-09	14.4966
11735989_s_at	3512	JCHAIN	joining chain of multimeric IgA and IgM	-1.21943	7.15264	-13.9502	4.97525e-11	1.66836e-09	15.2561
11736145_a_at	64847	SPATA20	spermatogenesis associated 20	-1.21963	8.88968	-14.9905	1.51932e-11	5.96817e-10	16.484
11755819_a_at	23586	DDX58	DExD/H-box helicase 58	-1.22118	7.73135	-11.4899	1.13546e-09	2.4845e-08	12.0119
11755525_a_at	84913	ATOH8	atonal bHLH transcription factor 8	-1.2215	7.16614	-14.28	3.38887e-11	1.19723e-09	15.6538
11727269_at	6274	S100A3	S100 calcium binding protein A3	-1.22278	5.35371	-5.78908	1.80998e-05	0.000121372	1.99542
11745890_x_at	26118	WSB1	WD repeat and SOCS box containing 1	-1.22283	10.2985	-11.8837	6.65197e-10	1.54863e-08	12.567
11737146_a_at	8651	SOCS1	suppressor of cytokine signaling 1	-1.22303	5.57933	-8.60052	9.30735e-08	1.18882e-06	7.43798
11724781_a_at	26091	HERC4	HECT and RLD domain containing E3 ubiquitin protein ligase 4	-1.2244	7.02415	-10.5619	4.24241e-09	7.93268e-08	10.6434
11755618_a_at	8659	ALDH4A1	aldehyde dehydrogenase 4 family member A1	-1.22541	7.18753	-16.1667	4.3158e-12	2.03245e-10	17.7846
11748347_a_at	23243	ANKRD28	ankyrin repeat domain 28	-1.22618	7.17044	-11.5352	1.06694e-09	2.35437e-08	12.0766
11751989_a_at	3696	ITGB8	integrin subunit beta 8	-1.22621	2.9671	-11.7926	7.51785e-10	1.72747e-08	12.44
11741103_a_at	311	ANXA11	annexin A11	-1.22722	11.4041	-19.2554	2.24751e-13	1.69833e-11	20.826
11748863_x_at	10550	ARL6IP5	ADP ribosylation factor like GTPase 6 interacting protein 5	-1.2284	11.2317	-11.1113	1.92444e-09	3.93706e-08	11.4642
11751951_a_at	9414	TJP2	tight junction protein 2	-1.22969	6.84424	-11.9823	5.83074e-10	1.3795e-08	12.7038
11751943_a_at	57631	LRCH2	leucine rich repeats and calponin homology domain containing 2	-1.22976	7.68385	-13.9597	4.91987e-11	1.65436e-09	15.2677
11736533_s_at	9208	LRRFIP1	LRR binding FLII interacting protein 1	-1.23221	8.44101	-11.9409	6.16155e-10	1.44946e-08	12.6465
11730142_a_at	2044	EPHA5	EPH receptor A5	-1.23354	3.95213	-11.708	8.42943e-10	1.91295e-08	12.3212
11733066_at	4801	NFYB	nuclear transcription factor Y subunit beta	-1.23375	6.02611	-14.0061	4.65925e-11	1.58169e-09	15.3241
11746047_x_at	654466	FGF7P3	fibroblast growth factor 7 pseudogene 3	-1.23476	6.47422	-13.5942	7.59491e-11	2.40134e-09	14.8178
11738056_a_at	219902	TMEM136	transmembrane protein 136	-1.23584	7.10065	-8.86819	5.94738e-08	7.99255e-07	7.9025
11758317_s_at	22898	DENND3	DENN domain containing 3	-1.23685	7.09523	-15.6737	7.24134e-12	3.1578e-10	17.2501
11753968_a_at	79987	SVEP1	sushi, von Willebrand factor type A, EGF and pentraxin domain containing 1	-1.2375	3.96614	-6.87808	2.07257e-06	1.80665e-05	4.22624
11717738_at	51449	PCYOX1	prenylcysteine oxidase 1	-1.23837	8.44525	-8.97621	4.97634e-08	6.84775e-07	8.08743
11717386_s_at	4495	MT1G	metallothionein 1G	-1.23886	4.76015	-8.14348	2.04153e-07	2.35593e-06	6.62374
11759623_at	54494	C11orf71	chromosome 11 open reading frame 71	-1.23998	5.41234	-9.67354	1.62779e-08	2.55526e-07	9.2472
11745716_s_at	857	CAV1	caveolin 1	-1.24056	12.4853	-17.2638	1.43178e-12	7.99844e-11	18.9225
11721902_a_at	5274	SERPINI1	serpin family I member 1	-1.24069	8.12026	-11.7487	7.97742e-10	1.82291e-08	12.3784
11753029_a_at	130733	TMEM178A	transmembrane protein 178A	-1.2419	4.93744	-8.40089	1.30741e-07	1.59503e-06	7.08563
11751430_a_at	116535	MRGPRF	MAS related GPR family member F	-1.2442	6.84821	-11.375	1.33078e-09	2.85756e-08	11.8472
11718988_s_at	6038	RNASE4	ribonuclease A family member 4	-1.24423	9.52425	-10.7674	3.14517e-09	6.088e-08	10.9541
11733140_s_at	10124	ARL4A	ADP ribosylation factor like GTPase 4A	-1.24428	9.83403	-16.2351	4.0214e-12	1.92308e-10	17.8575
11723802_at	2159	F10	coagulation factor X	-1.24478	6.50282	-9.87904	1.18358e-08	1.94622e-07	9.57805
11716975_a_at	5166	PDK4	pyruvate dehydrogenase kinase 4	-1.24551	3.77072	-9.91747	1.11568e-08	1.85304e-07	9.63939
11760256_a_at	56898	BDH2	3-hydroxybutyrate dehydrogenase 2	-1.24593	6.62867	-11.9994	5.69973e-10	1.3538e-08	12.7274
11733702_x_at	11065	UBE2C	ubiquitin conjugating enzyme E2 C	-1.24657	7.21559	-6.31157	6.27414e-06	4.77898e-05	3.08432
11724490_x_at	57016	AKR1B10	aldo-keto reductase family 1 member B10	-1.24674	4.7859	-7.7044	4.45359e-07	4.69458e-06	5.8159
11722193_a_at	387882	C12orf75	chromosome 12 open reading frame 75	-1.2477	10.5613	-16.1699	4.30152e-12	2.02765e-10	17.788
11728295_a_at	11142	PKIG	cAMP-dependent protein kinase inhibitor gamma	-1.24945	8.47453	-17.9334	7.52554e-13	4.6328e-11	19.5846
11758560_s_at	26091	HERC4	HECT and RLD domain containing E3 ubiquitin protein ligase 4	-1.24948	10.2847	-11.5266	1.07952e-09	2.37893e-08	12.0644
11716184_s_at	214	ALCAM	activated leukocyte cell adhesion molecule	-1.25023	8.55676	-11.4646	1.17562e-09	2.56106e-08	11.9759
11730240_a_at	154091	SLC2A12	solute carrier family 2 member 12	-1.25036	5.19838	-11.1841	1.73685e-09	3.6029e-08	11.5707
11736002_s_at	1634	DCN	decorin	-1.25178	12.1357	-11.5944	9.83797e-10	2.19042e-08	12.1608
11730383_a_at	112574	SNX18	sorting nexin 18	-1.25289	9.87697	-11.8766	6.71507e-10	1.56259e-08	12.5572
11750423_a_at	51091	SEPSECS	Sep (O-phosphoserine) tRNA:Sec (selenocysteine) tRNA synthase	-1.25509	4.92786	-9.81139	1.31379e-08	2.12296e-07	9.46969
11723389_a_at	404550	C16orf74	chromosome 16 open reading frame 74	-1.25613	5.63113	-12.6402	2.47416e-10	6.60511e-09	13.5933
11745791_a_at	100288152	SLC9A3-AS1	SLC9A3 antisense RNA 1	-1.25642	6.81886	-11.3604	1.35791e-09	2.907e-08	11.8262
11745724_at	378938	MALAT1	metastasis associated lung adenocarcinoma transcript 1 (non-protein coding)	-1.25764	7.35792	-15.8245	6.17174e-12	2.76694e-10	17.4152
11723352_a_at	130733	TMEM178A	transmembrane protein 178A	-1.25786	4.89834	-9.08367	4.17348e-08	5.8667e-07	8.26999
11721751_s_at	8324	FZD7	frizzled class receptor 7	-1.25789	9.13651	-18.477	4.53557e-13	3.02138e-11	20.1052
11720967_a_at	29899	GPSM2	G-protein signaling modulator 2	-1.25988	6.28272	-12.1734	4.5283e-10	1.11507e-08	12.9661
11757990_s_at	3075	CFH	complement factor H	-1.26048	9.77106	-16.501	3.06249e-12	1.53419e-10	18.1386
11757990_s_at	3078	CFHR1	complement factor H related 1	-1.26048	9.77106	-16.501	3.06249e-12	1.53419e-10	18.1386
11741761_a_at	60686	C14orf93	chromosome 14 open reading frame 93	-1.26061	3.90411	-9.82311	1.29021e-08	2.09031e-07	9.48849
11759499_at	81553	FAM49A	family with sequence similarity 49 member A	-1.2609	5.78426	-10.112	8.29341e-09	1.42876e-07	9.94733
11747487_a_at	5521	PPP2R2B	protein phosphatase 2 regulatory subunit Bbeta	-1.26121	3.05372	-12.6818	2.34632e-10	6.31833e-09	13.6483
11720048_x_at	51309	ARMCX1	armadillo repeat containing, X-linked 1	-1.26151	8.56993	-10.0258	9.45397e-09	1.60248e-07	9.81134
11744416_s_at	6297	SALL2	spalt like transcription factor 2	-1.26316	5.47705	-12.6036	2.59256e-10	6.8583e-09	13.5448
11757519_x_at	822	CAPG	capping actin protein, gelsolin like	-1.2643	8.4861	-16.3656	3.5164e-12	1.71641e-10	17.996
11715649_s_at	7296	TXNRD1	thioredoxin reductase 1	-1.26436	11.7244	-21.6132	3.10868e-14	3.31603e-12	22.8491
11736478_a_at	22936	ELL2	elongation factor for RNA polymerase II 2	-1.26485	7.58695	-13.878	5.41701e-11	1.79341e-09	15.168
11731052_a_at	57562	CEP126	centrosomal protein 126	-1.26491	7.00093	-16.739	2.40785e-12	1.25054e-10	18.3867
11739372_a_at	10982	MAPRE2	microtubule associated protein RP/EB family member 2	-1.26518	5.82043	-13.3771	9.87635e-11	2.98431e-09	14.5456
11716339_a_at	3638	INSIG1	insulin induced gene 1	-1.26523	7.75175	-9.73516	1.47871e-08	2.35094e-07	9.34692
11743514_a_at	3918	LAMC2	laminin subunit gamma 2	-1.26547	5.84836	-11.0458	2.11142e-09	4.27072e-08	11.3679
11734021_at	22941	SHANK2	SH3 and multiple ankyrin repeat domains 2	-1.26858	5.63728	-13.2426	1.16421e-10	3.42381e-09	14.3751
11740375_a_at	6001	RGS10	regulator of G-protein signaling 10	-1.26869	9.22947	-20.0898	1.08924e-13	9.27919e-12	21.5682
11723297_a_at	11217	AKAP2	A-kinase anchoring protein 2	-1.26907	9.90178	-9.51013	2.10437e-08	3.19888e-07	8.98064
11723297_a_at	445815	PALM2-AKAP2	PALM2-AKAP2 readthrough	-1.26907	9.90178	-9.51013	2.10437e-08	3.19888e-07	8.98064
11725890_s_at	368	ABCC6	ATP binding cassette subfamily C member 6	-1.27022	4.238	-12.6388	2.47849e-10	6.6131e-09	13.5915
11725890_s_at	653190	ABCC6P1	ATP binding cassette subfamily C member 6 pseudogene 1	-1.27022	4.238	-12.6388	2.47849e-10	6.6131e-09	13.5915
11725890_s_at	730013	ABCC6P2	ATP binding cassette subfamily C member 6 pseudogene 2	-1.27022	4.238	-12.6388	2.47849e-10	6.6131e-09	13.5915
11725890_s_at	105369239	LOC105369239	multidrug resistance-associated protein 6	-1.27022	4.238	-12.6388	2.47849e-10	6.6131e-09	13.5915
11736513_s_at	9397	NMT2	N-myristoyltransferase 2	-1.27205	7.88376	-14.8582	1.75971e-11	6.79384e-10	16.3321
11741255_at	200316	APOBEC3F	apolipoprotein B mRNA editing enzyme catalytic subunit 3F	-1.27221	6.99165	-14.2754	3.40692e-11	1.20275e-09	15.6483
11719412_at	5087	PBX1	PBX homeobox 1	-1.27397	7.244	-13.2903	1.09802e-10	3.25235e-09	14.4358
11717737_at	51449	PCYOX1	prenylcysteine oxidase 1	-1.2767	7.66306	-7.89725	3.15191e-07	3.46216e-06	6.17383
11730106_a_at	23236	PLCB1	phospholipase C beta 1	-1.27765	8.55643	-17.6135	1.02049e-12	5.98448e-11	19.2712
11736701_at	375287	RBM43	RNA binding motif protein 43	-1.27832	6.41735	-9.69275	1.57969e-08	2.49081e-07	9.27834
11718168_a_at	26509	MYOF	myoferlin	-1.28019	11.4443	-18.1869	5.93251e-13	3.81337e-11	19.8293
11719520_at	9037	SEMA5A	semaphorin 5A	-1.28071	8.36402	-17.3454	1.3222e-12	7.53074e-11	19.0045
11716182_s_at	214	ALCAM	activated leukocyte cell adhesion molecule	-1.28103	8.8623	-7.93959	2.92344e-07	3.23849e-06	6.25177
11730806_at	11118	BTN3A2	butyrophilin subfamily 3 member A2	-1.28181	6.48692	-16.118	4.53919e-12	2.11888e-10	17.7325
11722638_at	23243	ANKRD28	ankyrin repeat domain 28	-1.28413	10.2854	-15.3135	1.06652e-11	4.39527e-10	16.85
11741146_x_at	221	ALDH3B1	aldehyde dehydrogenase 3 family member B1	-1.28453	7.64564	-16.175	4.27908e-12	2.02093e-10	17.7934
11726141_at	56776	FMN2	formin 2	-1.2849	7.22812	-15.3931	9.78323e-12	4.07937e-10	16.9392
11719521_at	9037	SEMA5A	semaphorin 5A	-1.28517	9.06143	-16.6227	2.70707e-12	1.38134e-10	18.2659
11725277_a_at	117854	TRIM6	tripartite motif containing 6	-1.28626	6.62347	-16.5927	2.79046e-12	1.41946e-10	18.2346
11763874_x_at	100128108	LOC100128108	putative ubiquitin-conjugating enzyme E2Q2-like protein	-1.28669	5.70854	-9.8463	1.24483e-08	2.02764e-07	9.52567
11755831_a_at	126820	WDR63	WD repeat domain 63	-1.28735	5.26385	-13.4589	8.94206e-11	2.7507e-09	14.6486
11720068_a_at	83464	APH1B	aph-1 homolog B, gamma-secretase subunit	-1.28883	7.19928	-18.2282	5.70874e-13	3.70806e-11	19.8688
11739667_at	11226	GALNT6	polypeptide N-acetylgalactosaminyltransferase 6	-1.2892	6.56032	-16.4792	3.1311e-12	1.56206e-10	18.1158
11719522_at	9037	SEMA5A	semaphorin 5A	-1.28945	9.51552	-14.5263	2.55643e-11	9.29688e-10	15.9456
11725691_a_at	4013	VWA5A	von Willebrand factor A domain containing 5A	-1.28983	5.30247	-9.47206	2.23509e-08	3.37377e-07	8.91808
11723981_s_at	79822	ARHGAP28	Rho GTPase activating protein 28	-1.28984	5.88467	-15.158	1.26359e-11	5.08467e-10	16.6746
11725761_at	8506	CNTNAP1	contactin associated protein 1	-1.29032	7.19532	-12.1564	4.63051e-10	1.13853e-08	12.943
11720948_a_at	771	CA12	carbonic anhydrase 12	-1.29218	5.76405	-11.399	1.28712e-09	2.77344e-08	11.8818
11736102_at	4121	MAN1A1	mannosidase alpha class 1A member 1	-1.29266	8.46441	-12.1064	4.94603e-10	1.19943e-08	12.8746
11748495_a_at	116039	OSR2	odd-skipped related transciption factor 2	-1.29319	4.50696	-13.3234	1.05445e-10	3.14399e-09	14.4777
11721978_a_at	51196	PLCE1	phospholipase C epsilon 1	-1.29363	5.61716	-13.8657	5.49633e-11	1.8136e-09	15.1529
11724836_at	57552	NCEH1	neutral cholesterol ester hydrolase 1	-1.2938	7.88467	-10.9301	2.48948e-09	4.93855e-08	11.1969
11751921_s_at	196	AHR	aryl hydrocarbon receptor	-1.29425	9.61665	-10.5931	4.05295e-09	7.618e-08	10.6908
11724720_a_at	79695	GALNT12	polypeptide N-acetylgalactosaminyltransferase 12	-1.29443	6.90855	-14.6702	2.17234e-11	8.10859e-10	16.1141
11735263_s_at	6326	SCN2A	sodium voltage-gated channel alpha subunit 2	-1.2965	5.01518	-10.0369	9.2957e-09	1.58052e-07	9.82887
11753923_at	401093	MBNL1-AS1	MBNL1 antisense RNA 1	-1.29736	7.54999	-15.5333	8.41296e-12	3.58656e-10	17.0952
11746351_a_at	5980	REV3L	REV3 like, DNA directed polymerase zeta catalytic subunit	-1.29851	8.28419	-13.4214	9.35769e-11	2.85417e-09	14.6015
11745075_x_at	2941	GSTA4	glutathione S-transferase alpha 4	-1.29913	9.49496	-20.6402	6.85618e-14	6.20586e-12	22.0417
11756160_x_at	8727	CTNNAL1	catenin alpha like 1	-1.29932	9.13318	-15.9038	5.67758e-12	2.57809e-10	17.5014
11756073_x_at	3115	HLA-DPB1	major histocompatibility complex, class II, DP beta 1	-1.30051	4.58401	-10.5178	4.52629e-09	8.39059e-08	10.5761
11718023_x_at	6744	SSFA2	sperm specific antigen 2	-1.30121	9.7634	-12.5614	2.73641e-10	7.15471e-09	13.4888
11721873_at	3433	IFIT2	interferon induced protein with tetratricopeptide repeats 2	-1.30122	5.02117	-6.95082	1.80349e-06	1.59742e-05	4.36982
11747726_s_at	29091	STXBP6	syntaxin binding protein 6	-1.30128	5.12962	-12.6154	2.55351e-10	6.79494e-09	13.5605
11762266_x_at	3575	IL7R	interleukin 7 receptor	-1.30157	5.72422	-12.727	2.21535e-10	6.01416e-09	13.7079
11715652_a_at	5118	PCOLCE	procollagen C-endopeptidase enhancer	-1.30186	10.2266	-18.0907	6.49103e-13	4.08226e-11	19.7367
11756473_a_at	10659	CELF2	CUGBP Elav-like family member 2	-1.30211	8.58601	-11.6974	8.55178e-10	1.93716e-08	12.3062
11755900_a_at	2131	EXT1	exostosin glycosyltransferase 1	-1.30215	10.9865	-19.4697	1.86091e-13	1.45818e-11	21.0196
11742823_a_at	51110	LACTB2	lactamase beta 2	-1.30485	8.00944	-7.14014	1.26003e-06	1.16986e-05	4.74023
11720799_s_at	51762	RAB8B	RAB8B, member RAS oncogene family	-1.30487	10.243	-12.1479	4.68309e-10	1.14804e-08	12.9312
11749677_a_at	9666	DZIP3	DAZ interacting zinc finger protein 3	-1.30592	6.68812	-12.8273	1.95169e-10	5.38155e-09	13.8393
11752577_at	2495	FTH1	ferritin heavy chain 1	-1.30643	11.5884	-23.9519	5.27831e-15	7.84534e-13	24.6509
11753292_x_at	960	CD44	CD44 molecule (Indian blood group)	-1.30675	10.4485	-22.9327	1.1195e-14	1.42076e-12	23.8884
11720500_a_at	144363	ETFRF1	electron transfer flavoprotein regulatory factor 1	-1.30688	7.57548	-5.32078	4.81675e-05	0.000286809	0.993168
11724466_x_at	54443	ANLN	anillin actin binding protein	-1.30805	6.81535	-9.69121	1.58349e-08	2.49602e-07	9.27585
11716847_a_at	29015	SLC43A3	solute carrier family 43 member 3	-1.30926	6.25658	-13.3997	9.60804e-11	2.91391e-09	14.5741
11753004_a_at	1152	CKB	creatine kinase B	-1.30997	8.60288	-18.0513	6.73496e-13	4.2225e-11	19.6988
11756387_x_at	10124	ARL4A	ADP ribosylation factor like GTPase 4A	-1.31035	8.71178	-16.4614	3.18856e-12	1.58293e-10	18.097
11749184_a_at	1837	DTNA	dystrobrevin alpha	-1.31136	4.69124	-8.57504	9.71736e-08	1.23355e-06	7.39328
11745976_x_at	311	ANXA11	annexin A11	-1.31151	10.8622	-21.8746	2.52778e-14	2.77524e-12	23.0599
11742043_a_at	960	CD44	CD44 molecule (Indian blood group)	-1.31243	9.51212	-18.3993	4.87181e-13	3.21936e-11	20.0317
11744615_s_at	126823	KLHDC9	kelch domain containing 9	-1.31284	5.69503	-9.87735	1.18667e-08	1.95e-07	9.57535
11736803_at	2254	FGF9	fibroblast growth factor 9	-1.31371	6.07304	-10.6419	3.7741e-09	7.16254e-08	10.7648
11716716_x_at	1508	CTSB	cathepsin B	-1.3147	10.8307	-8.48905	1.12453e-07	1.39705e-06	7.24186
11715584_a_at	857	CAV1	caveolin 1	-1.31471	12.8026	-23.6509	6.56973e-15	9.31716e-13	24.4292
11745715_a_at	857	CAV1	caveolin 1	-1.31471	12.8026	-23.6509	6.56973e-15	9.31716e-13	24.4292
11758261_s_at	55165	CEP55	centrosomal protein 55	-1.31489	6.00567	-8.08858	2.24759e-07	2.5597e-06	6.52411
11724084_a_at	126823	KLHDC9	kelch domain containing 9	-1.31495	4.92816	-9.76005	1.42261e-08	2.27457e-07	9.38708
11738248_a_at	54494	C11orf71	chromosome 11 open reading frame 71	-1.31538	5.87398	-14.0963	4.19309e-11	1.44323e-09	15.4333
11743261_a_at	311	ANXA11	annexin A11	-1.31603	11.9714	-19.1018	2.57616e-13	1.89418e-11	20.686
11745464_x_at	1033	CDKN3	cyclin dependent kinase inhibitor 3	-1.31693	5.73296	-10.2461	6.77669e-09	1.19747e-07	10.157
11753788_x_at	1033	CDKN3	cyclin dependent kinase inhibitor 3	-1.31712	5.65289	-10.9272	2.49972e-09	4.95687e-08	11.1926
11715956_s_at	10550	ARL6IP5	ADP ribosylation factor like GTPase 6 interacting protein 5	-1.31728	10.813	-16.2249	4.0637e-12	1.93583e-10	17.8467
11745948_a_at	1111	CHEK1	checkpoint kinase 1	-1.31967	6.25554	-12.7575	2.13152e-10	5.81265e-09	13.7479
11761270_a_at	79587	CARS2	cysteinyl-tRNA synthetase 2, mitochondrial (putative)	-1.31998	4.65467	-13.4089	9.50133e-11	2.88685e-09	14.5857
11725554_at	83935	TMEM133	transmembrane protein 133	-1.32011	6.04653	-16.3883	3.43545e-12	1.68688e-10	18.0201
11747262_s_at	22800	RRAS2	related RAS viral (r-ras) oncogene homolog 2	-1.3207	9.88644	-9.76757	1.4061e-08	2.25518e-07	9.3992
11747064_x_at	311	ANXA11	annexin A11	-1.3226	10.8619	-21.2033	4.32026e-14	4.26017e-12	22.5134
11754769_a_at	79656	BEND5	BEN domain containing 5	-1.32411	3.73028	-12.9242	1.72786e-10	4.84261e-09	13.9657
11722162_a_at	10769	PLK2	polo like kinase 2	-1.32528	7.74592	-14.8513	1.77327e-11	6.84085e-10	16.3241
11734948_x_at	2252	FGF7	fibroblast growth factor 7	-1.32634	9.28634	-9.43799	2.3593e-08	3.54504e-07	8.86194
11755947_x_at	134147	CMBL	carboxymethylenebutenolidase homolog	-1.32689	9.37976	-18.7565	3.51425e-13	2.44295e-11	20.3673
11719891_s_at	1429	CRYZ	crystallin zeta	-1.3273	8.08532	-11.5452	1.05243e-09	2.32857e-08	12.0908
11749208_a_at	22936	ELL2	elongation factor for RNA polymerase II 2	-1.32745	8.6913	-7.54064	5.99636e-07	6.08925e-06	5.50807
11757871_s_at	5087	PBX1	PBX homeobox 1	-1.32789	11.1582	-16.5321	2.96722e-12	1.49554e-10	18.1713
11723747_a_at	54478	PIMREG	PICALM interacting mitotic regulator	-1.32819	5.51878	-5.8295	1.66546e-05	0.000112766	2.08081
11719489_a_at	1909	EDNRA	endothelin receptor type A	-1.32983	4.96537	-10.3858	5.50098e-09	9.98793e-08	10.3736
11731557_at	171024	SYNPO2	synaptopodin 2	-1.33001	4.88234	-11.9727	5.90609e-10	1.394e-08	12.6904
11743816_s_at	1901	S1PR1	sphingosine-1-phosphate receptor 1	-1.33073	6.39725	-9.26711	3.10064e-08	4.50311e-07	8.57835
11716554_a_at	3108	HLA-DMA	major histocompatibility complex, class II, DM alpha	-1.33078	6.22854	-11.0261	2.17112e-09	4.37539e-08	11.3389
11718002_at	64115	VSIR	V-set immunoregulatory receptor	-1.33127	5.1789	-10.9602	2.38455e-09	4.75057e-08	11.2416
11722601_a_at	39	ACAT2	acetyl-CoA acetyltransferase 2	-1.33182	8.79794	-11.9133	6.39323e-10	1.49765e-08	12.6082
11721712_at	57619	SHROOM3	shroom family member 3	-1.33367	8.45882	-15.6315	7.57426e-12	3.27413e-10	17.2037
11758089_s_at	3161	HMMR	hyaluronan mediated motility receptor	-1.33388	6.19913	-7.01129	1.60747e-06	1.445e-05	4.48865
11726260_a_at	50862	RNF141	ring finger protein 141	-1.33407	8.14525	-19.7899	1.40859e-13	1.15237e-11	21.305
11746088_a_at	10561	IFI44	interferon induced protein 44	-1.33425	5.12316	-7.27455	9.79726e-07	9.35949e-06	5.0003
11726871_s_at	3953	LEPR	leptin receptor	-1.33462	6.67164	-11.484	1.14471e-09	2.50142e-08	12.0035
11728826_s_at	388610	TRNP1	TMF1-regulated nuclear protein 1	-1.33465	9.00004	-14.7782	1.92413e-11	7.30889e-10	16.2397
11748817_a_at	285195	SLC9A9	solute carrier family 9 member A9	-1.33556	4.32039	-12.4511	3.15353e-10	8.12513e-09	13.3416
11730821_x_at	1033	CDKN3	cyclin dependent kinase inhibitor 3	-1.33667	6.0923	-9.23486	3.26595e-08	4.71278e-07	8.52444
11720488_a_at	126393	HSPB6	heat shock protein family B (small) member 6	-1.33815	5.92299	-9.06009	4.33727e-08	6.06764e-07	8.23005
11736101_at	4121	MAN1A1	mannosidase alpha class 1A member 1	-1.33887	7.66905	-10.5138	4.55329e-09	8.43748e-08	10.5699
11753291_a_at	960	CD44	CD44 molecule (Indian blood group)	-1.33963	10.5415	-23.0996	9.87689e-15	1.27973e-12	24.0156
11715917_a_at	960	CD44	CD44 molecule (Indian blood group)	-1.33998	11.0654	-13.3965	9.64613e-11	2.92367e-09	14.57
11718781_s_at	23635	SSBP2	single stranded DNA binding protein 2	-1.34045	9.15129	-12.5902	2.63736e-10	6.95452e-09	13.527
11744436_a_at	11113	CIT	citron rho-interacting serine/threonine kinase	-1.3409	5.57124	-10.1058	8.37138e-09	1.44119e-07	9.93761
11736856_at	387496	RASL11A	RAS like family 11 member A	-1.34331	5.1151	-13.5617	7.89791e-11	2.4788e-09	14.7773
11739617_x_at	960	CD44	CD44 molecule (Indian blood group)	-1.34383	10.9079	-15.4998	8.72087e-12	3.69238e-10	17.058
11747923_s_at	3918	LAMC2	laminin subunit gamma 2	-1.34449	7.54243	-15.6517	7.4126e-12	3.21548e-10	17.226
11730555_a_at	445372	TRIM6-TRIM34	TRIM6-TRIM34 readthrough	-1.3448	5.81796	-13.2513	1.15181e-10	3.39138e-09	14.3862
11730555_a_at	53840	TRIM34	tripartite motif containing 34	-1.3448	5.81796	-13.2513	1.15181e-10	3.39138e-09	14.3862
11730363_a_at	3269	HRH1	histamine receptor H1	-1.3455	6.53366	-8.10733	2.17487e-07	2.48775e-06	6.55818
11721305_a_at	22822	PHLDA1	pleckstrin homology like domain family A member 1	-1.34639	10.4042	-9.94924	1.06264e-08	1.77627e-07	9.68996
11747570_a_at	4257	MGST1	microsomal glutathione S-transferase 1	-1.34749	11.4479	-19.843	1.34549e-13	1.10992e-11	21.3519
11736387_a_at	18	ABAT	4-aminobutyrate aminotransferase	-1.34787	5.60709	-11.255	1.57266e-09	3.30947e-08	11.6738
11723563_at	4013	VWA5A	von Willebrand factor A domain containing 5A	-1.34844	6.57173	-10.404	5.35455e-09	9.72921e-08	10.4016
11718335_a_at	25802	LMOD1	leiomodin 1	-1.35059	6.8345	-17.3287	1.34389e-12	7.61048e-11	18.9877
11718269_x_at	23452	ANGPTL2	angiopoietin like 2	-1.3517	8.99415	-15.696	7.07137e-12	3.09732e-10	17.2747
11743846_s_at	3075	CFH	complement factor H	-1.35278	8.99135	-13.4926	8.58523e-11	2.66367e-09	14.6908
11743846_s_at	3078	CFHR1	complement factor H related 1	-1.35278	8.99135	-13.4926	8.58523e-11	2.66367e-09	14.6908
11742282_a_at	958	CD40	CD40 molecule	-1.35424	4.6001	-10.6202	3.89547e-09	7.35341e-08	10.732
11725413_x_at	9830	TRIM14	tripartite motif containing 14	-1.35641	7.5479	-10.183	7.45052e-09	1.29892e-07	10.0586
11743262_x_at	311	ANXA11	annexin A11	-1.3565	10.9216	-22.5776	1.46548e-14	1.7478e-12	23.6148
11737948_a_at	727	C5	complement C5	-1.35676	5.0852	-13.3872	9.75578e-11	2.95329e-09	14.5583
11757237_s_at	93164	HTR7P1	5-hydroxytryptamine receptor 7 pseudogene 1	-1.35705	7.86831	-13.2727	1.12198e-10	3.31268e-09	14.4134
11718876_at	92737	DNER	delta/notch like EGF repeat containing	-1.35773	4.45621	-9.71427	1.52758e-08	2.41867e-07	9.31316
11735990_x_at	3512	JCHAIN	joining chain of multimeric IgA and IgM	-1.35787	6.86423	-12.3037	3.81831e-10	9.59813e-09	13.1431
11759177_at	4121	MAN1A1	mannosidase alpha class 1A member 1	-1.35813	10.096	-12.156	4.63337e-10	1.13867e-08	12.9423
11749307_x_at	900	CCNG1	cyclin G1	-1.35946	9.08799	-12.0932	5.03357e-10	1.21768e-08	12.8563
11723755_x_at	6943	TCF21	transcription factor 21	-1.36014	7.18011	-11.9869	5.79519e-10	1.37175e-08	12.7101
11759214_s_at	375287	RBM43	RNA binding motif protein 43	-1.36084	7.76422	-13.3351	1.03957e-10	3.10522e-09	14.4925
11740540_a_at	5980	REV3L	REV3 like, DNA directed polymerase zeta catalytic subunit	-1.3619	9.65417	-12.6144	2.55709e-10	6.79508e-09	13.5591
11757072_s_at	9394	HS6ST1	heparan sulfate 6-O-sulfotransferase 1	-1.36195	7.86721	-14.5726	2.42564e-11	8.89311e-10	16
11750871_a_at	9060	PAPSS2	3'-phosphoadenosine 5'-phosphosulfate synthase 2	-1.36207	8.47159	-12.4167	3.29709e-10	8.45979e-09	13.2954
11726682_a_at	4211	MEIS1	Meis homeobox 1	-1.36269	8.86503	-14.8808	1.71597e-11	6.64569e-10	16.3581
11751005_a_at	7869	SEMA3B	semaphorin 3B	-1.3631	6.49063	-9.16102	3.68022e-08	5.24331e-07	8.40051
11716148_a_at	10758	TRAF3IP2	TRAF3 interacting protein 2	-1.36317	7.93575	-18.9001	3.0865e-13	2.20125e-11	20.5005
11743112_at	6281	S100A10	S100 calcium binding protein A10	-1.36342	11.6631	-16.664	2.59651e-12	1.33452e-10	18.3089
11716185_a_at	214	ALCAM	activated leukocyte cell adhesion molecule	-1.36391	7.38105	-10.5325	4.42931e-09	8.23859e-08	10.5986
11724066_s_at	54985	HCFC1R1	host cell factor C1 regulator 1	-1.36402	9.62175	-19.4929	1.82349e-13	1.43487e-11	21.0404
11758602_at	79875	THSD4	thrombospondin type 1 domain containing 4	-1.36416	7.7767	-15.2292	1.16899e-11	4.766e-10	16.7551
11743113_x_at	6281	S100A10	S100 calcium binding protein A10	-1.36515	12.004	-14.4525	2.78037e-11	1.00375e-09	15.8587
11754652_a_at	10455	ECI2	enoyl-CoA delta isomerase 2	-1.3662	9.60847	-17.0417	1.78093e-12	9.63358e-11	18.6976
11745192_a_at	23136	EPB41L3	erythrocyte membrane protein band 4.1 like 3	-1.36708	7.38053	-8.49669	1.10998e-07	1.38182e-06	7.25536
11729663_a_at	1111	CHEK1	checkpoint kinase 1	-1.36756	6.06501	-13.2724	1.12241e-10	3.31268e-09	14.413
11732609_s_at	84224	NBPF3	NBPF member 3	-1.36765	7.29064	-9.9813	1.01178e-08	1.70102e-07	9.74088
11741427_a_at	114876	OSBPL1A	oxysterol binding protein like 1A	-1.36787	8.9548	-20.0448	1.13184e-13	9.5925e-12	21.529
11722367_a_at	9787	DLGAP5	DLG associated protein 5	-1.36891	4.33138	-7.92258	3.01312e-07	3.33112e-06	6.22047
11754316_a_at	8503	PIK3R3	phosphoinositide-3-kinase regulatory subunit 3	-1.36907	6.59532	-16.9407	1.96847e-12	1.05329e-10	18.5944
11715921_a_at	10801	SEPT9	septin 9	-1.36941	10.9757	-18.5307	4.31729e-13	2.90332e-11	20.1559
11721759_a_at	55616	ASAP3	ArfGAP with SH3 domain, ankyrin repeat and PH domain 3	-1.36978	8.27746	-18.8297	3.28889e-13	2.32548e-11	20.4353
11752548_a_at	216	ALDH1A1	aldehyde dehydrogenase 1 family member A1	-1.3698	6.50553	-10.3791	5.55645e-09	1.00628e-07	10.3632
11722358_a_at	2037	EPB41L2	erythrocyte membrane protein band 4.1 like 2	-1.37072	7.61804	-18.5377	4.28993e-13	2.88884e-11	20.1624
11739699_at	11037	STON1	stonin 1	-1.3713	7.00417	-15.2989	1.0835e-11	4.45044e-10	16.8336
11758070_s_at	5087	PBX1	PBX homeobox 1	-1.37343	10.2842	-16.7659	2.34372e-12	1.22108e-10	18.4145
11758489_s_at	57619	SHROOM3	shroom family member 3	-1.37397	8.90817	-22.0858	2.14228e-14	2.41531e-12	23.2285
11725191_s_at	57211	ADGRG6	adhesion G protein-coupled receptor G6	-1.3742	10.4142	-18.9004	3.08559e-13	2.20125e-11	20.5008
11758196_s_at	3488	IGFBP5	insulin like growth factor binding protein 5	-1.37513	12.0897	-13.937	5.053e-11	1.68643e-09	15.24
11723773_a_at	26090	ABHD12	abhydrolase domain containing 12	-1.3769	7.84454	-19.141	2.48768e-13	1.85154e-11	20.7219
11759301_at	10982	MAPRE2	microtubule associated protein RP/EB family member 2	-1.37837	4.96472	-10.2981	6.26935e-09	1.1182e-07	10.2378
11715710_s_at	1075	CTSC	cathepsin C	-1.37957	8.65627	-13.1662	1.27902e-10	3.72822e-09	14.2776
11722359_x_at	2037	EPB41L2	erythrocyte membrane protein band 4.1 like 2	-1.38045	7.75118	-17.2953	1.3884e-12	7.81435e-11	18.9542
11716183_a_at	214	ALCAM	activated leukocyte cell adhesion molecule	-1.38093	7.8941	-8.94819	5.2111e-08	7.11906e-07	8.03961
11715675_a_at	900	CCNG1	cyclin G1	-1.38234	8.92843	-9.60555	1.81066e-08	2.80585e-07	9.13668
11726693_s_at	284	ANGPT1	angiopoietin 1	-1.38384	7.60058	-14.1841	3.78591e-11	1.3196e-09	15.5391
11723465_a_at	10659	CELF2	CUGBP Elav-like family member 2	-1.38393	8.08849	-14.3064	3.28718e-11	1.16463e-09	15.6853
11721308_at	22822	PHLDA1	pleckstrin homology like domain family A member 1	-1.3852	8.41368	-9.31764	2.85893e-08	4.18895e-07	8.66258
11749122_a_at	79649	MAP7D3	MAP7 domain containing 3	-1.38536	4.75762	-11.1914	1.71922e-09	3.57532e-08	11.5813
11736250_a_at	9768	PCLAF	PCNA clamp associated factor	-1.38557	7.67371	-11.0979	1.96129e-09	4.00471e-08	11.4445
11733535_a_at	283927	NUDT7	nudix hydrolase 7	-1.386	6.49832	-13.1754	1.26457e-10	3.69261e-09	14.2893
11731681_a_at	83473	KATNAL2	katanin catalytic subunit A1 like 2	-1.38616	5.05794	-11.3847	1.31293e-09	2.82291e-08	11.8612
11750585_a_at	10801	SEPT9	septin 9	-1.38683	10.9701	-20.2522	9.49055e-14	8.22653e-12	21.7092
11720971_at	7153	TOP2A	topoisomerase (DNA) II alpha	-1.39079	6.41928	-10.6862	3.53806e-09	6.75082e-08	10.8319
11726691_a_at	284	ANGPT1	angiopoietin 1	-1.39119	7.1607	-8.90059	5.63683e-08	7.61657e-07	7.95814
11719488_at	1909	EDNRA	endothelin receptor type A	-1.39203	7.4337	-15.8043	6.30462e-12	2.81671e-10	17.3932
11723774_x_at	26090	ABHD12	abhydrolase domain containing 12	-1.39215	7.96357	-16.1979	4.17897e-12	1.98311e-10	17.8179
11723951_a_at	7035	TFPI	tissue factor pathway inhibitor	-1.39233	9.31136	-14.5059	2.61636e-11	9.4939e-10	15.9216
11743847_x_at	3075	CFH	complement factor H	-1.39396	8.97189	-15.4763	8.94366e-12	3.77058e-10	17.0319
11724830_at	412	STS	steroid sulfatase	-1.39418	7.07968	-11.6353	9.30512e-10	2.09059e-08	12.2186
11750598_s_at	22974	TPX2	TPX2, microtubule nucleation factor	-1.397	6.13454	-11.7518	7.9436e-10	1.81602e-08	12.3828
11744567_a_at	971	CD72	CD72 molecule	-1.39792	3.75963	-14.3816	3.01545e-11	1.07917e-09	15.7747
11743568_a_at	23266	ADGRL2	adhesion G protein-coupled receptor L2	-1.39887	7.90332	-14.7719	1.93793e-11	7.35001e-10	16.2323
11735377_at	2660	MSTN	myostatin	-1.39923	3.44135	-15.6276	7.60537e-12	3.28184e-10	17.1994
11720574_s_at	5205	ATP8B1	ATPase phospholipid transporting 8B1	-1.39993	9.82956	-11.4663	1.17294e-09	2.55634e-08	11.9782
11732901_a_at	9582	APOBEC3B	apolipoprotein B mRNA editing enzyme catalytic subunit 3B	-1.39996	4.74949	-6.53572	4.02682e-06	3.24446e-05	3.54112
11732901_a_at	200315	APOBEC3A	apolipoprotein B mRNA editing enzyme catalytic subunit 3A	-1.39996	4.74949	-6.53572	4.02682e-06	3.24446e-05	3.54112
11732901_a_at	100913187	APOBEC3A_B	APOBEC3A and APOBEC3B deletion hybrid	-1.39996	4.74949	-6.53572	4.02682e-06	3.24446e-05	3.54112
11728404_at	79801	SHCBP1	SHC binding and spindle associated 1	-1.39999	5.40286	-7.04225	1.5158e-06	1.37131e-05	4.5493
11733262_a_at	10659	CELF2	CUGBP Elav-like family member 2	-1.40112	7.48984	-10.6991	3.47278e-09	6.6365e-08	10.8512
11757793_s_at	7035	TFPI	tissue factor pathway inhibitor	-1.40158	10.8873	-18.7757	3.45337e-13	2.40754e-11	20.3852
11746893_a_at	4354	MPP1	membrane palmitoylated protein 1	-1.40234	7.82528	-21.2188	4.26634e-14	4.24142e-12	22.5262
11733864_a_at	332	BIRC5	baculoviral IAP repeat containing 5	-1.40253	7.55581	-8.34377	1.44225e-07	1.74321e-06	6.98388
11722563_x_at	1595	CYP51A1	cytochrome P450 family 51 subfamily A member 1	-1.40421	9.30119	-9.18104	3.56274e-08	5.09353e-07	8.43417
11722563_x_at	401387	LRRD1	leucine rich repeats and death domain containing 1	-1.40421	9.30119	-9.18104	3.56274e-08	5.09353e-07	8.43417
11720494_a_at	8727	CTNNAL1	catenin alpha like 1	-1.40457	9.63723	-12.6881	2.32767e-10	6.27836e-09	13.6566
11751274_a_at	283298	OLFML1	olfactomedin like 1	-1.40458	4.85824	-14.397	2.96245e-11	1.06251e-09	15.793
11731866_a_at	127943	FCRLB	Fc receptor like B	-1.40481	4.62181	-12.1844	4.4634e-10	1.10277e-08	12.9811
11753706_a_at	808	CALM3	calmodulin 3	-1.40764	7.80609	-12.8946	1.79314e-10	4.99446e-09	13.9272
11753706_a_at	805	CALM2	calmodulin 2	-1.40764	7.80609	-12.8946	1.79314e-10	4.99446e-09	13.9272
11755671_a_at	54843	SYTL2	synaptotagmin like 2	-1.4088	7.80249	-12.9228	1.73078e-10	4.84806e-09	13.9639
11748602_a_at	9532	BAG2	BCL2 associated athanogene 2	-1.41089	8.28541	-9.83936	1.25823e-08	2.0443e-07	9.51455
11744218_at	6591	SNAI2	snail family transcriptional repressor 2	-1.41143	9.99289	-19.5875	1.67888e-13	1.33381e-11	21.1251
11741135_s_at	1123	CHN1	chimerin 1	-1.41187	11.3064	-21.7681	2.74926e-14	2.99724e-12	22.9744
11730873_a_at	83593	RASSF5	Ras association domain family member 5	-1.41385	6.02306	-13.5832	7.6963e-11	2.42939e-09	14.8041
11733841_a_at	2123	EVI2A	ecotropic viral integration site 2A	-1.41676	5.12087	-6.47508	4.53708e-06	3.59358e-05	3.41817
11732567_at	4155	MBP	myelin basic protein	-1.41751	4.88811	-10.4735	4.83197e-09	8.89395e-08	10.5083
11724701_x_at	57412	AS3MT	arsenite methyltransferase	-1.41764	5.11522	-8.50848	1.08794e-07	1.35944e-06	7.27616
11724701_x_at	100528007	BORCS7-ASMT	BORCS7-ASMT readthrough (NMD candidate)	-1.41764	5.11522	-8.50848	1.08794e-07	1.35944e-06	7.27616
11726055_at	8705	B3GALT4	beta-1,3-galactosyltransferase 4	-1.41815	6.14419	-11.1267	1.88311e-09	3.8626e-08	11.4867
11728763_x_at	79690	GAL3ST4	galactose-3-O-sulfotransferase 4	-1.41956	9.10661	-21.1871	4.37713e-14	4.29002e-12	22.5001
11728307_x_at	51454	GULP1	GULP, engulfment adaptor PTB domain containing 1	-1.42092	7.11831	-9.75747	1.42831e-08	2.2812e-07	9.38292
11722639_a_at	23648	SSBP3	single stranded DNA binding protein 3	-1.42117	8.24343	-20.1813	1.00773e-13	8.67436e-12	21.6478
11723448_x_at	7851	MALL	mal, T-cell differentiation protein like	-1.42139	6.34642	-12.4088	3.33076e-10	8.52409e-09	13.2848
11724061_s_at	114876	OSBPL1A	oxysterol binding protein like 1A	-1.42169	9.40232	-18.1564	6.10404e-13	3.90335e-11	19.8
11720535_a_at	326625	MMAB	methylmalonic aciduria (cobalamin deficiency) cblB type	-1.42243	7.48033	-12.7235	2.22524e-10	6.03498e-09	13.7033
11737791_s_at	23780	APOL2	apolipoprotein L2	-1.42273	7.63322	-14.0051	4.66454e-11	1.5824e-09	15.3229
11737791_s_at	8542	APOL1	apolipoprotein L1	-1.42273	7.63322	-14.0051	4.66454e-11	1.5824e-09	15.3229
11715665_a_at	5696	PSMB8	proteasome subunit beta 8	-1.42552	8.93419	-21.2949	4.01176e-14	4.0689e-12	22.589
11716455_at	22836	RHOBTB3	Rho related BTB domain containing 3	-1.42582	10.4409	-10.4305	5.14846e-09	9.41696e-08	10.4424
11747259_a_at	4856	NOV	nephroblastoma overexpressed	-1.4261	6.21317	-12.9135	1.75114e-10	4.88865e-09	13.9518
11745975_a_at	311	ANXA11	annexin A11	-1.42687	10.847	-23.3748	8.04912e-15	1.09448e-12	24.2233
11715411_a_at	2034	EPAS1	endothelial PAS domain protein 1	-1.4271	11.0037	-19.3601	2.04909e-13	1.5724e-11	20.9208
11757425_s_at	7412	VCAM1	vascular cell adhesion molecule 1	-1.42718	7.0326	-12.8767	1.83401e-10	5.09681e-09	13.9038
11746894_x_at	4354	MPP1	membrane palmitoylated protein 1	-1.4276	7.79014	-19.2735	2.21193e-13	1.67869e-11	20.8424
11723754_a_at	6943	TCF21	transcription factor 21	-1.42806	6.94322	-14.1124	4.11524e-11	1.42138e-09	15.4527
11744276_a_at	822	CAPG	capping actin protein, gelsolin like	-1.42868	7.97818	-16.3373	3.61998e-12	1.75499e-10	17.9661
11733530_at	51279	C1RL	complement C1r subcomponent like	-1.42954	8.35605	-18.4339	4.7189e-13	3.12667e-11	20.0645
11722998_a_at	4329	ALDH6A1	aldehyde dehydrogenase 6 family member A1	-1.43029	7.04314	-16.7027	2.49727e-12	1.28753e-10	18.3491
11757789_a_at	2037	EPB41L2	erythrocyte membrane protein band 4.1 like 2	-1.43072	9.79798	-21.2385	4.19874e-14	4.21414e-12	22.5425
11726173_at	51435	SCARA3	scavenger receptor class A member 3	-1.43367	8.76988	-14.1147	4.10415e-11	1.41854e-09	15.4555
11758294_s_at	51309	ARMCX1	armadillo repeat containing, X-linked 1	-1.43508	9.35951	-9.4195	2.42967e-08	3.64303e-07	8.83144
11717575_at	5507	PPP1R3C	protein phosphatase 1 regulatory subunit 3C	-1.43519	11.8785	-19.7914	1.40675e-13	1.15237e-11	21.3063
11756706_a_at	1803	DPP4	dipeptidyl peptidase 4	-1.43544	7.70949	-10.2411	6.82793e-09	1.20524e-07	10.1492
11715691_s_at	7538	ZFP36	ZFP36 ring finger protein	-1.43708	10.1152	-15.2818	1.10384e-11	4.52272e-10	16.8144
11734982_a_at	9737	GPRASP1	G protein-coupled receptor associated sorting protein 1	-1.43758	5.62079	-10.4949	4.68163e-09	8.63972e-08	10.5411
11740120_a_at	10592	SMC2	structural maintenance of chromosomes 2	-1.43787	7.6988	-18.3565	5.06837e-13	3.32704e-11	19.9911
11723641_a_at	2517	FUCA1	fucosidase, alpha-L- 1, tissue	-1.43868	7.4794	-14.3111	3.26964e-11	1.15925e-09	15.6909
11718268_a_at	23452	ANGPTL2	angiopoietin like 2	-1.44027	9.91292	-19.9881	1.18793e-13	9.9967e-12	21.4794
11721897_a_at	79132	DHX58	DExH-box helicase 58	-1.44271	6.59503	-12.851	1.89427e-10	5.24662e-09	13.8703
[truncated: 738 more rows]
